# Supplementary material for: Dimerization reactions with oxidized brominated thiophenes
Source: Royal Society of Chemistry journal article supplement (doi:10.1039/d3nj00029j), 2023-01-01
Supplement: d3nj00029j1.pdf [file d3nj00029j1.pdf]

## Supporting Information

### Dimerization reactions with oxidized brominated thiophenes

Univ Angers, CNRS, MOLTECH-ANJOU, SFR MATRIX, F-49000 Angers, France

Khaled Youssef, Magali Alain, Thomas Cauchy and Frédéric Gohier

|                                                                              |                     |
|------------------------------------------------------------------------------|---------------------|
| A- Experimental procedure.....                                               | 2                   |
| Figure S 1 : <sup>1</sup> H NMR spectrum of <b>1-SO<sub>2</sub></b> .....    | 6                   |
| Figure S 2 : <sup>1</sup> H NMR spectrum of <b>1-CySO</b> .....              | 6                   |
| Figure S 3: <sup>13</sup> C NMR spectrum of <b>1-CySO</b> .....              | 7                   |
| Figure S 4: <sup>1</sup> H NMR spectrum of <b>1-BtSO<sub>2</sub></b> .....   | 8                   |
| Figure S 5: <sup>13</sup> C NMR spectrum of <b>1-BtSO<sub>2</sub></b> .....  | 8                   |
| Figure S 6: <sup>1</sup> H NMR spectrum of <b>2-Cymix</b> .....              | 9                   |
| Figure S 7: <sup>13</sup> C NMR spectrum of <b>2-Cymix</b> .....             | 9                   |
| Figure S 8: <sup>1</sup> H NMR spectrum of <b>3-Cymix</b> .....              | 10                  |
| Figure S 9: <sup>13</sup> C NMR spectrum of <b>3-Cymix</b> .....             | 10                  |
| Figure S 10 : <sup>1</sup> H NMR spectrum of <b>4-SO<sub>2</sub></b> .....   | 11                  |
| Figure S 11: <sup>1</sup> H NMR spectrum of <b>4-BtSO<sub>2</sub></b> .....  | 11                  |
| Figure S 12: <sup>13</sup> C NMR spectrum of <b>4-BtSO<sub>2</sub></b> ..... | 12                  |
| <a href="#">X-ray structures of</a>                                          |                     |
| 1-CySO.....                                                                  | 13                  |
| 2-Cymix.....                                                                 | 14                  |
| 3-Cymix.....                                                                 | 15                  |
| B- Theoretical calculations.....                                             | 17                  |
| <a href="#">3,4-dibromothiophene 1</a> .....                                 | <a href="#">18</a>  |
| <a href="#">1-SO</a> .....                                                   | <a href="#">27</a>  |
| <a href="#">1-SO<sub>2</sub></a> .....                                       | <a href="#">34</a>  |
| <a href="#">1-CySO</a> .....                                                 | <a href="#">42</a>  |
| <a href="#">1-Cymix</a> .....                                                | <a href="#">45</a>  |
| <a href="#">1-Cy</a> .....                                                   | <a href="#">47</a>  |
| <a href="#">2-bromothiophene 2</a> .....                                     | <a href="#">51</a>  |
| <a href="#">2-SO</a> .....                                                   | <a href="#">58</a>  |
| <a href="#">2-SO<sub>2</sub></a> .....                                       | <a href="#">66</a>  |
| <a href="#">2-CySO</a> .....                                                 | <a href="#">74</a>  |
| <a href="#">2-Cymix</a> .....                                                | <a href="#">77</a>  |
| <a href="#">2-Cy</a> .....                                                   | <a href="#">81</a>  |
| <a href="#">3-bromothiophene 3</a> .....                                     | <a href="#">84</a>  |
| <a href="#">3-SO</a> .....                                                   | <a href="#">90</a>  |
| <a href="#">3-SO<sub>2</sub></a> .....                                       | <a href="#">96</a>  |
| <a href="#">3-CySO</a> .....                                                 | <a href="#">99</a>  |
| <a href="#">3-Cymix</a> .....                                                | <a href="#">102</a> |
| <a href="#">3-Cy</a> .....                                                   | <a href="#">105</a> |
| <a href="#">2,5-dibromothiophene 4</a> .....                                 | <a href="#">108</a> |
| <a href="#">4-SO</a> .....                                                   | <a href="#">111</a> |

## A- Experimental Procedure

**General information.** 3,4-dibromothiophene S,S-dioxide was prepared by the procedure of Lu.<sup>1</sup> 2,5-dibromothiophene, 2,3,4,5-tetrabromothiophene S,S-dioxides are synthesized following the procedure of V. G. Nenajdenko.<sup>2</sup> Reagents and chemicals from commercial sources were used without further purification. Solvents were dried and purified using standard techniques. Microwave-assisted reactions were performed in the cavity of a Biotage Initiator+ system in sealed reactors. Flexible plates ALUGRAM® Xtra SIL G UV254 from MACHEREY-NAGEL were used for TLC. Compounds were detected by UV irradiation (Bio block Scientific). NMR spectra were recorded with a Bruker AVANCE III 300 (<sup>1</sup>H, 300 MHz and <sup>13</sup>C, 75MHz) or a Bruker AVANCE DRX500 (<sup>1</sup>H, 500 MHz; <sup>13</sup>C, 125 MHz). Chemical shifts are given in ppm relative to the deuterated solvent and coupling constants J in Hz. Matrix-Assisted Laser Desorption/Ionization was performed on MALDI-TOF MS BIFLEX III Bruker Daltonics spectrometer. High-resolution mass spectrometry (HRMS) was performed with a JEOL JMS700 B/E or a JEOL Spiral-TOF JMS3000.

### ❖ Synthesis of 1-SO<sub>2</sub>

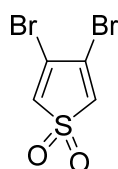

Formula: C<sub>4</sub>H<sub>2</sub>Br<sub>2</sub>O<sub>2</sub>S  
MW= 271.8142g/mol

To a 100 ml three-neck round-bottom flask fitted with a dropping funnel and a thermometer, 1.6 ml (35eq) of 30% H<sub>2</sub>O<sub>2</sub> was added dropwise to the mixture of trifluoroacetic anhydride (4.23 ml, 15eq) and sulfuric acid (0.25ml) and stirred in a NaCl-ice bath (-15 to -20 °C) so that the temperature was kept below 0°C. The solution was stirred for another 15 min, and 0.5 g (2.1 mmol) of 3,4-dibromothiophene in 5 ml of dichloromethane was added all at once. The reaction mixture was allowed to warm to room temperature with stirring for 3 h. Then the solution was transferred to a 250 ml erlenmeyer flask in a NaCl-ice bath, and 150 ml of saturated sodium carbonate solution were slowly added to bring the pH up to around 7. The solution was extracted with dichloromethane. The organic phases were combined and dried over MgSO<sub>4</sub>. Solvents were removed on a rotary evaporator, to give a white-pale yellow powder with a yield of 76%. <sup>1</sup>H NMR (300 MHz, Chloroform-*d*) δ 6.83 (s, 1H).

### ❖ Synthesis of 1-CySO

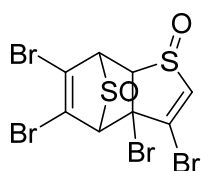

Formula: C<sub>8</sub>H<sub>4</sub>Br<sub>4</sub>O<sub>2</sub>S<sub>2</sub>  
MW: 511.6386g/mol

To a 100 ml three-neck round-bottom flask fitted with a dropping funnel and a thermometer, 0.38 ml (8eq) of 30% H<sub>2</sub>O<sub>2</sub> was added dropwise to the mixture of trifluoroacetic anhydride (4.23 ml, 15eq) and sulfuric acid (0.25ml) and stirred in a NaCl-ice bath (-15 to -20 °C) so that the temperature was kept below 0°C. The solution was stirred for another 15 min, and 0.5 g (2.1 mmol) of 3,4-dibromothiophene in 5 ml of dichloromethane was added all at once. The reaction mixture was allowed to warm to room

temperature with stirring for 3 h. Then the solution was transferred to a 250 ml erlenmeyer flask in a NaCl-ice bath, and 150 ml of saturated sodium carbonate solution was slowly added to bring the pH up to around 7. The solution was extracted with dichloromethane. The organic solutions were combined and dried over MgSO<sub>4</sub>. Solvents were removed on a rotary evaporator, and the remaining brown-orange solid was washed with 20 ml of ethanol (three times). A gray precipitate was obtained in 42 % yield. **<sup>1</sup>H NMR** (300 MHz, DMSO-*d*<sub>6</sub>) δ 7.43 (s, 1H), 5.52 (d, *J* = 3.7 Hz, 1H), 5.04 (dd, *J* = 2.1, 0.5 Hz, 1H), 4.74 (dd, *J* = 3.7, 2.1 Hz, 1H). **<sup>13</sup>C NMR** (75 MHz, DMSO-*d*<sub>6</sub>) δ 138.1, 131.4, 121.7, 117.2, 79.9, 72.6, 70.6, 70.4. **HRMS** (EI) *m/z*: Calc for C<sub>8</sub>H<sub>4</sub>Br<sub>4</sub>O<sub>2</sub>S (M<sup>+</sup>), 511.6386; Found 367.7499 (extrusion of SO<sub>2</sub>, HBr upon measurement). **IR**: 1148, 1123, 1052, 1028 cm<sup>-1</sup>.

#### ❖ Synthesis of 1-BtSO<sub>2</sub>

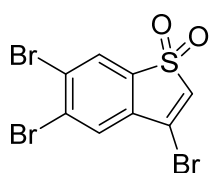

Formula: C<sub>8</sub>H<sub>3</sub>Br<sub>3</sub>O<sub>2</sub>S  
MW= 399.7404

Into a round bottom flask charged stirring bar, 3g of 3,4-dibromothiophene S,S-dioxide **1-SO<sub>2</sub>** were dissolved in 40 ml of acetic acid and heated at 170°C for 2 days. Purification using column chromatography with (PE/DCM;1/1) as eluent gave a white powder with 82% (1.8g) yield. **<sup>1</sup>H NMR** (300 MHz, Chloroform-*d*) δ 7.94 (s, 1H), 7.78 (s, 1H), 6.99 (s, 1H). **<sup>13</sup>C NMR** (75 MHz, Chloroform-*d*) δ 136.59, 131.26, 131.10, 130.73, 129.55, 128.96, 127.60, 125.84. **HRMS** (EI) *m/z*: Calc for C<sub>8</sub>H<sub>3</sub>Br<sub>3</sub>O<sub>2</sub>S (M<sup>+</sup>), 399.7404; Found: 399.7402. **Mp**= 200-203°C. **IR**: 1306 cm<sup>-1</sup>.

#### ❖ Synthesis of 2-Cymix

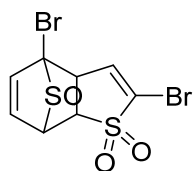

Formula: C<sub>8</sub>H<sub>6</sub>Br<sub>2</sub>O<sub>3</sub>S<sub>2</sub>  
MW=374.0610 g/mol

To a round bottom flask charged with 0.3g of 2-bromothiophene in 5ml of DCM, 1.58g (3.5eq) of *m*-CPBA dissolved in 15ml of DCM was added dropwise while stirring the mixture at 0°C. This mixture was allowed to come back to room temperature and was stirred for 17h. The reaction medium is diluted with DCM (15ml) and then washed with 1M NaHCO<sub>3</sub> solution, and 1M NaHSO<sub>3</sub> solution. The organic phase was dried over MgSO<sub>4</sub>. The solvent was removed on a rotary evaporator, and purified with SiO<sub>2</sub> column chromatography using PE/DCM (6/4) as eluent to give a pale-yellow color powder with a 70% yield. **<sup>1</sup>H NMR** (300 MHz, Chloroform-*d*) δ 6.73 (dd, *J* = 3.1, 0.7 Hz, 1H), 6.39 (ddd, *J* = 7.0, 5.0, 0.6 Hz, 1H), 6.21 (ddd, *J* = 7.0, 1.6, 0.6 Hz, 1H), 4.67 – 4.60 (m, 1H), 4.31 (dd, *J* = 8.4, 3.0 Hz, 1H), 4.25 (t, *J* = 4.5 Hz, 1H). **<sup>13</sup>C NMR** (75 MHz, Chloroform-*d*) δ 132.30, 131.55, 128.44, 124.90, 62.09, 61.54, 54.04. **HRMS** (EI) *m/z*: Calc for C<sub>8</sub>H<sub>6</sub>Br<sub>2</sub>O<sub>3</sub>S<sub>2</sub> (M<sup>+</sup>): 371.8125; Found: 371.8122. **Mp**= 166-168°C. **IR**: 1307, 1133, 1115.80, 1092 cm<sup>-1</sup>.

### ❖ Synthesis of 3-Cymix

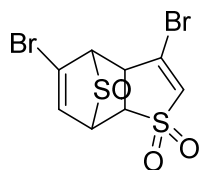

Formula: C<sub>8</sub>H<sub>6</sub>Br<sub>2</sub>O<sub>3</sub>S<sub>2</sub>  
MW=374.0610 g/mol

This compound was synthesized using the same procedure than 2-bromothiophene but using 3-bromothiophene. A pale-yellow powder was obtained and isolated with a 70% yield. <sup>1</sup>H NMR (300 MHz, Chloroform-*d*) δ 6.77 (dd, *J* = 1.7, 0.6 Hz, 1H), 6.58 (dd, *J* = 4.8, 1.7 Hz, 1H), 4.72 (ddd, *J* = 8.0, 3.9, 1.7 Hz, 1H), 4.56 (ddt, *J* = 8.0, 3.9, 0.5 Hz, 1H), 4.33 (ddd, *J* = 5.1, 3.9, 1.5 Hz, 1H), 4.27 (dt, *J* = 3.9, 1.6 Hz, 1H). <sup>13</sup>C NMR (125 MHz, DMSO-*d*<sub>6</sub>) δ 135.50, 133.61, 129.62, 115.32, 70.54, 64.81, 64.29, 54.72. HRMS (EI) *m/z*: Calc for C<sub>8</sub>H<sub>6</sub>Br<sub>2</sub>O<sub>3</sub>S<sub>2</sub> (M<sup>+</sup>): 371.8125; Found: 371.8119. Mp= 112-114°C. IR: 1298, 1284, 1216, 11249, 1086 cm<sup>-1</sup>.

### ❖ Synthesis of 4-SO<sub>2</sub>

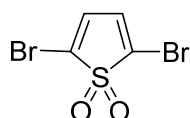

Formula: C<sub>4</sub>H<sub>2</sub>Br<sub>2</sub>O<sub>2</sub>S  
MW= 271.8142g/mol

To a 100 ml three-neck round-bottom flask fitted with a dropping funnel and a thermometer, 1.6 ml (35eq) of 30% H<sub>2</sub>O<sub>2</sub> was added to the mixture of trifluoroacetic anhydride (4.23 ml, 15eq) and sulfuric acid (0.25ml) and stirred in a NaCl-ice bath (-15 to -20 °C) so that the temperature was kept below 0°C. The solution was stirred for another 15 min, and 0.5 g (2.1 mmol) of 2,5-dibromothiophene in 5 ml of acetonitrile was added all at once. The reaction mixture was allowed to warm to room temperature with stirring for 3 h. Then the solution was transferred to a 250 ml erlenmeyer flask in a NaCl-ice bath, and 150 ml of saturated sodium carbonate solution was slowly added to bring the pH up to around 7. The solution was extracted with dichloromethane. The organic phases were combined and dried over MgSO<sub>4</sub>. Solvents were removed on a rotary evaporator, to give a white-pale yellow powder with a yield of 69%. <sup>1</sup>H NMR (300 MHz, Chloroform-*d*) 6.87 (s, 1H).

### ❖ Synthesis of 4-BtSO<sub>2</sub>

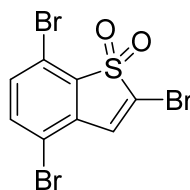

Formula: C<sub>8</sub>H<sub>3</sub>Br<sub>3</sub>O<sub>2</sub>S  
MW= 399.7404

Into a round bottom flask charged with stirring bar, 0.45g of 2,5-dibromothiophene was dissolved in 20 ml of acetic acid and heated at 170°C for 2 days and followed by TLC. Purification using column chromatography with (PE/DCM;1/1) as eluent gave a white powder (260 mg, 77%). <sup>1</sup>H NMR (300 MHz, Chloroform-*d*) δ 7.54 (d, *J* = 8.6 Hz, 1H), 7.45 (d, *J* = 8.6 Hz, 1H), 7.37 (s, 1H). <sup>13</sup>C NMR (76 MHz, Chloroform-*d*) δ 138.11, 136.64, 134.89, 133.97, 128.28, 125.15, 118.15, 116.14. HRMS (EI) *m/z*: Calc for C<sub>8</sub>H<sub>3</sub>Br<sub>3</sub>O<sub>2</sub>S (M<sup>+</sup>),399.7404; Found :399.7402. Mp= 175-177°C. IR: 1315, 1149.59 cm<sup>-1</sup>.

## ❖ Synthesis of 5-SO<sub>2</sub>

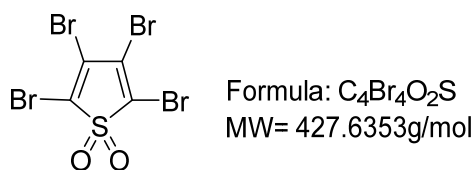

To a 100 ml three-neck round-bottom flask fitted with a dropping funnel and a thermometer, 2ml (35eq) of 30% H<sub>2</sub>O<sub>2</sub> were added dropwise to a mixture of trifluoroacetic anhydride (5.2ml,15eq) and sulfuric acid (1ml) and stirred in a NaCl-ice bath (-15 to -20 °C) so that the temperature was kept below 0°C. The solution was stirred for another 15 min, and 1 g (2.5mmol) of 2,3,4,5-tetrabromothiophene in 5 ml of dichloromethane was added all at once. The reaction mixture was allowed to warm to room temperature with stirring for 3 h. Then the solution was transferred to a 250 ml erlenmeyer flask in a NaCl-ice bath, and 150 ml of saturated sodium carbonate solution was slowly added to bring the pH up to around 7. The solution was extracted with dichloromethane. The organic phases were combined and dried over MgSO<sub>4</sub>. Solvents were removed on a rotary evaporator, to give a gray-brown powder with a yield of 80%. **HRMS** (EI) m/z: Calc for C<sub>4</sub>Br<sub>4</sub>O<sub>2</sub>S (M<sup>+</sup>): 427.6353; Found: 427.6345. **<sup>13</sup>C NMR** (76 MHz, Chloroform-*d*) δ 128.55, 120.49. Mp=198-200°C

# NMR Spectra of synthesized compounds

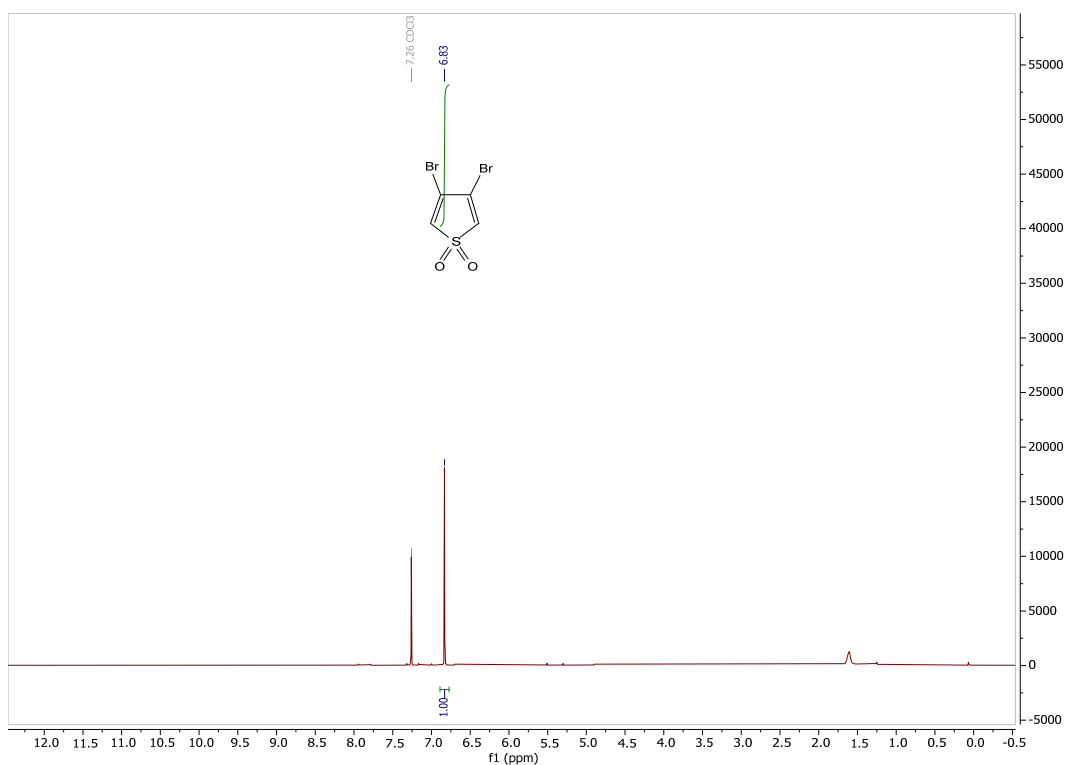

Figure S 1 :  $^1\text{H}$  NMR spectrum of **1-SO<sub>2</sub>**

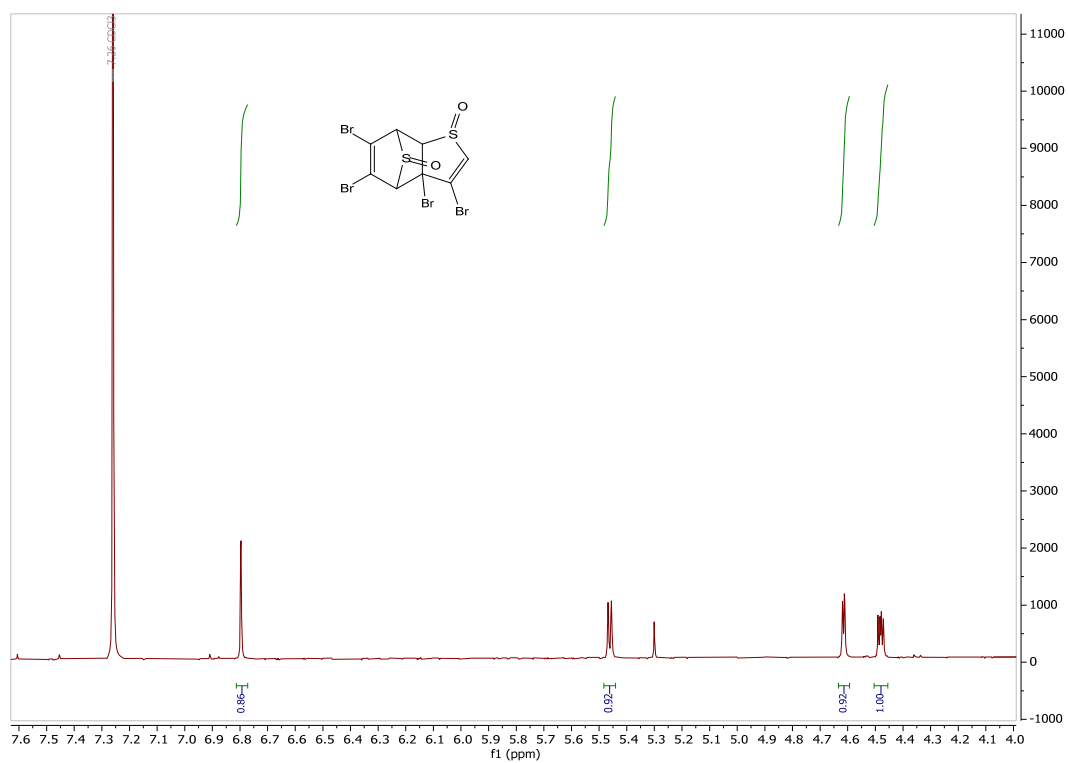

Figure S 2 :  $^1\text{H}$  NMR spectrum of **1-CySO**

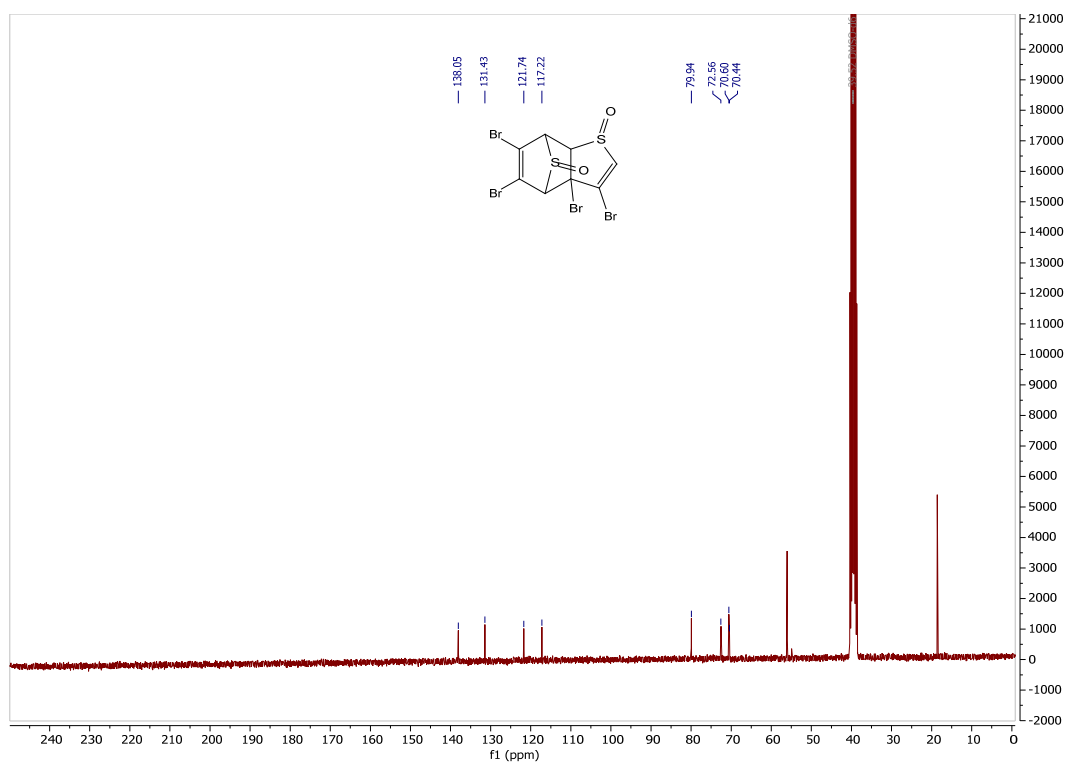

Figure S 3:  $^{13}\text{C}$  NMR spectrum of 1-CySO

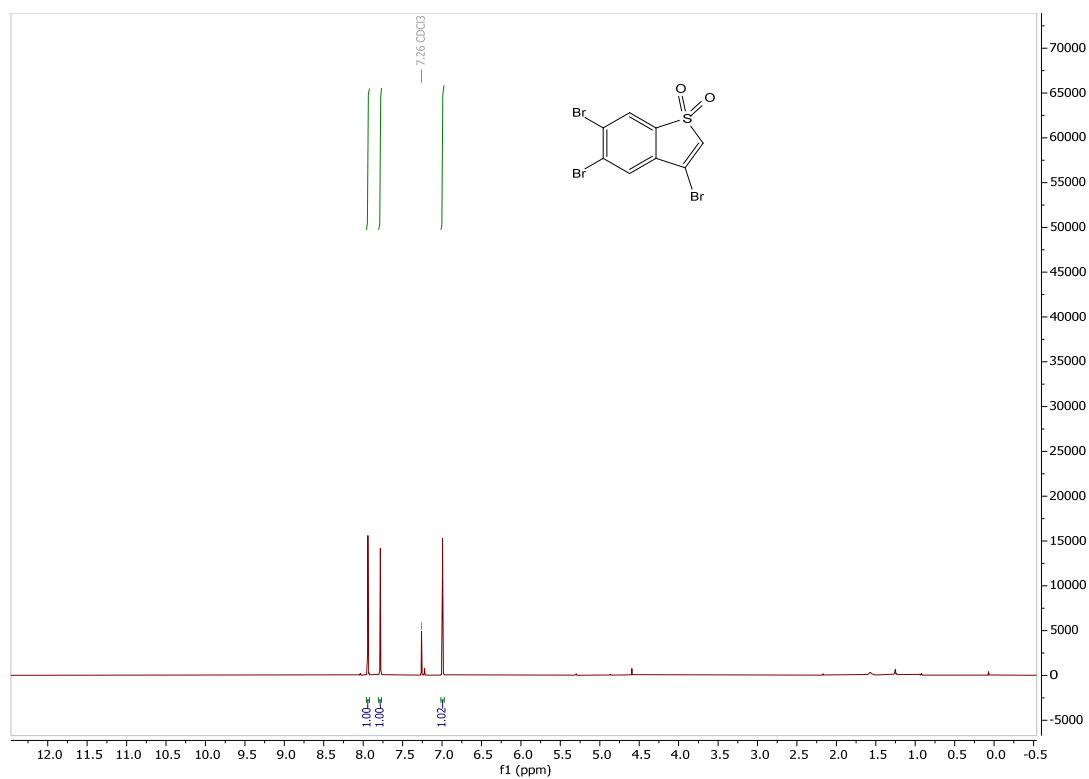

Figure S 4: <sup>1</sup>H NMR spectrum of 1-BtSO<sub>2</sub>

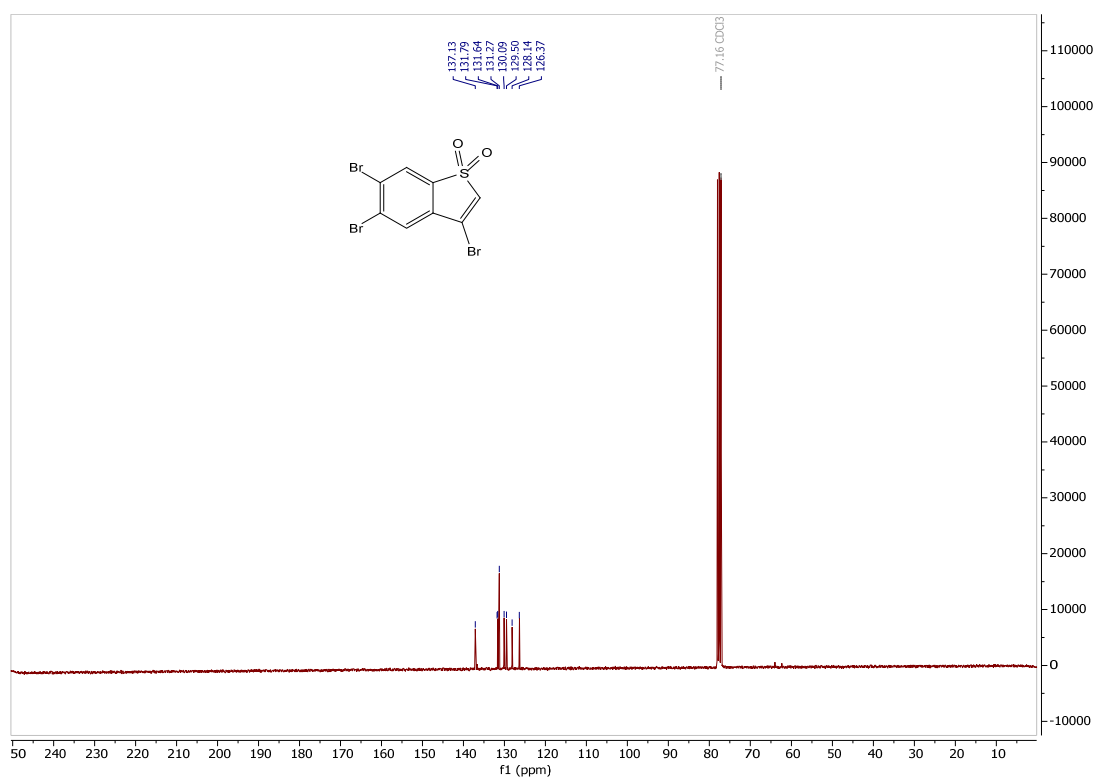

Figure S 5: <sup>13</sup>C NMR spectrum of 1-BtSO<sub>2</sub>



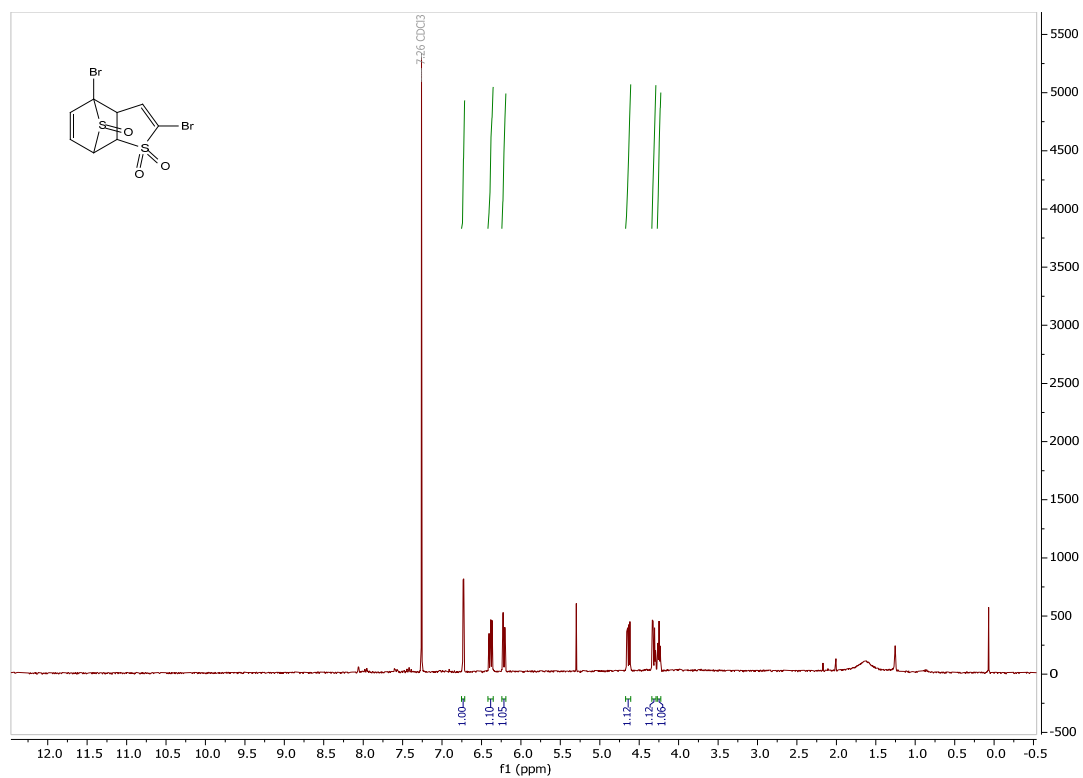

Figure S 6:  $^1\text{H}$  NMR spectrum of 2-Cymix

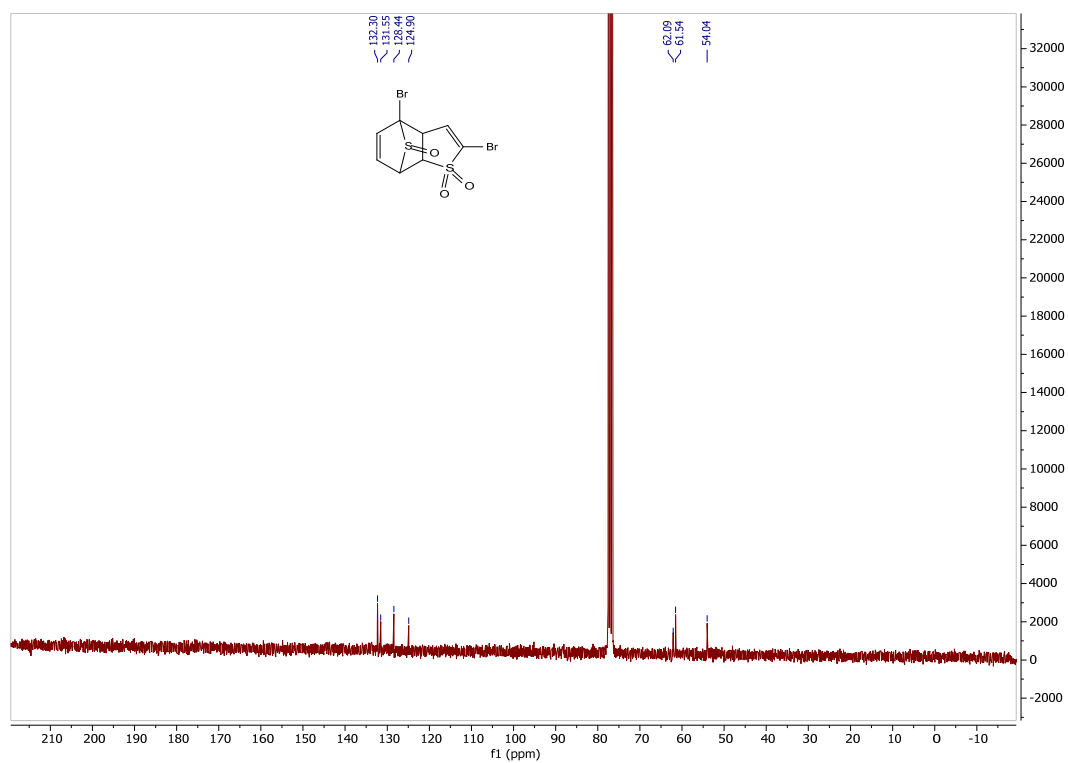

Figure S 7:  $^{13}\text{C}$  NMR spectrum of 2-Cymix

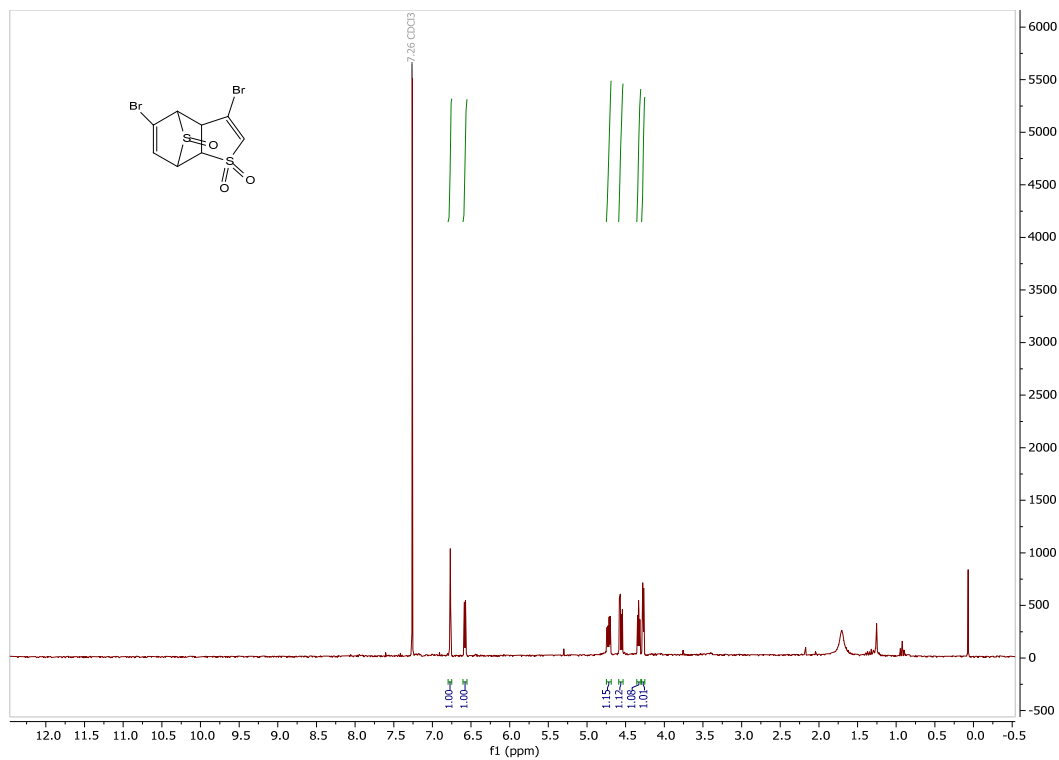

Figure S 8:  $^1\text{H}$  NMR spectrum of 3-Cymix

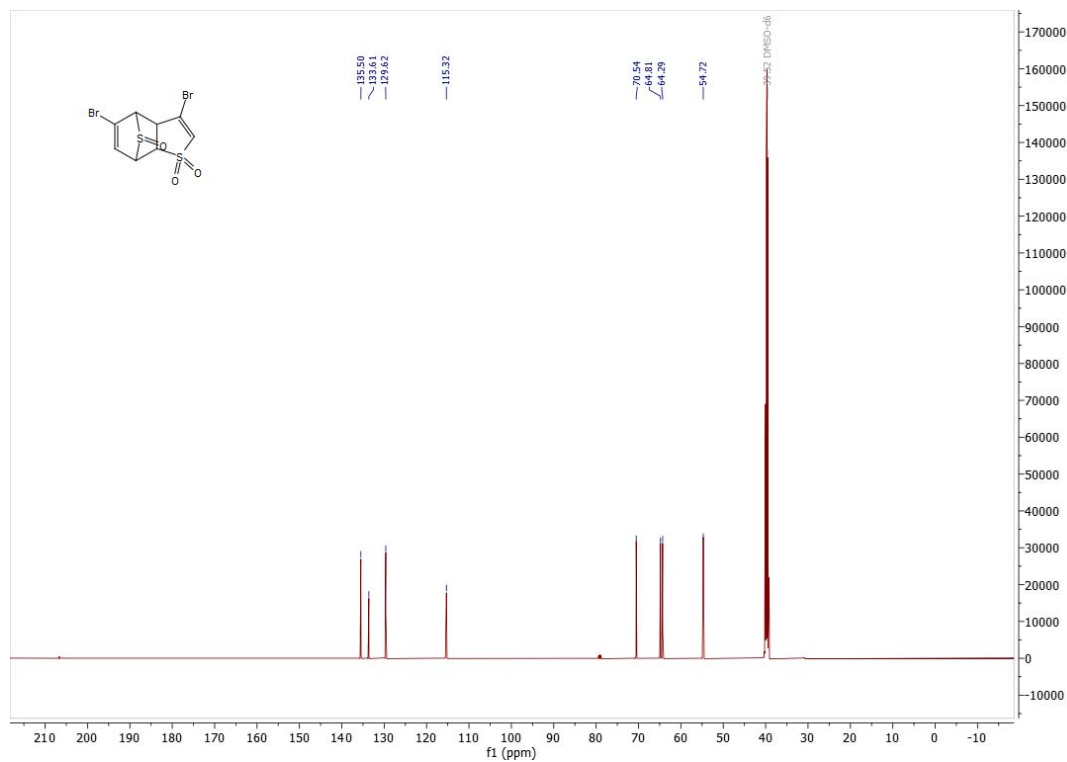

Figure S 9:  $^{13}\text{C}$  NMR spectrum of 3-Cymix

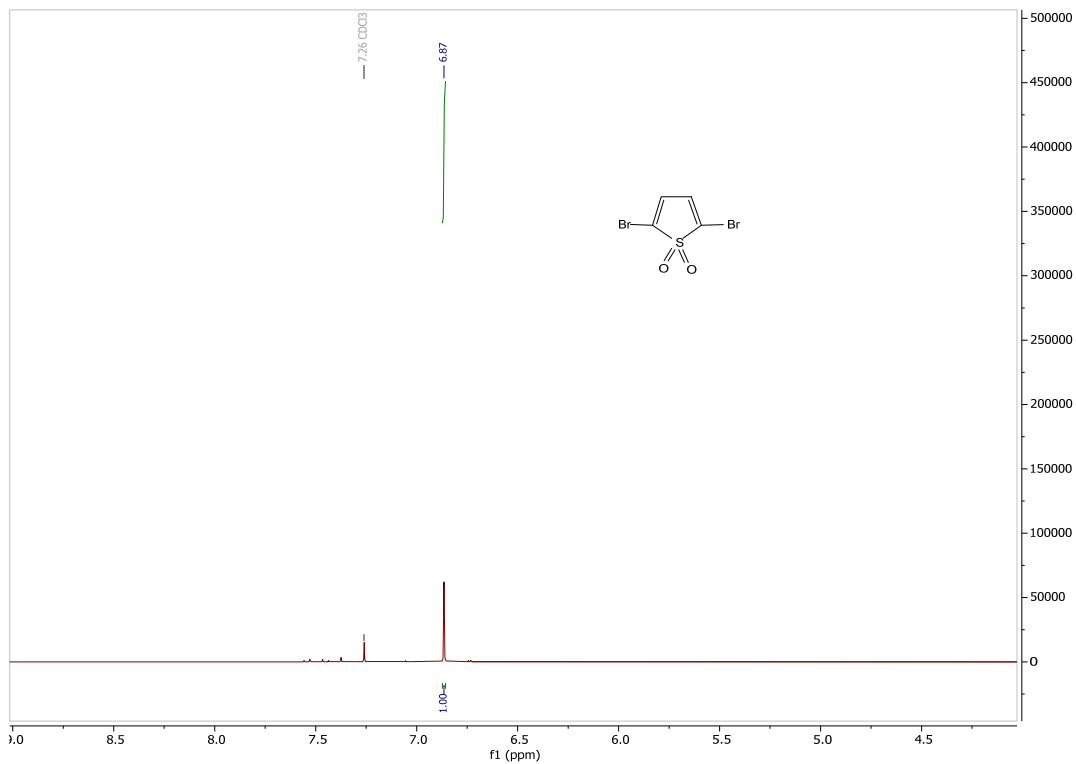

Figure S 10 :  $^1\text{H}$  NMR spectrum of **4-SO<sub>2</sub>**

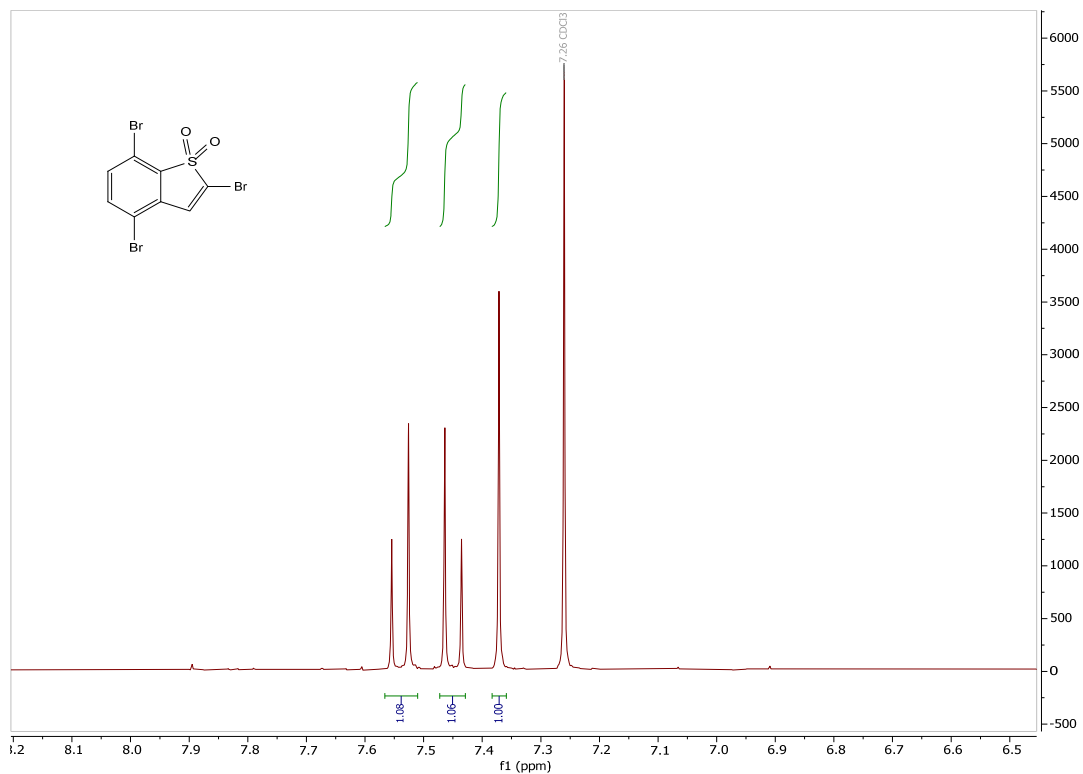

Figure S 11:  $^1\text{H}$  NMR spectrum of **4-BtSO<sub>2</sub>**

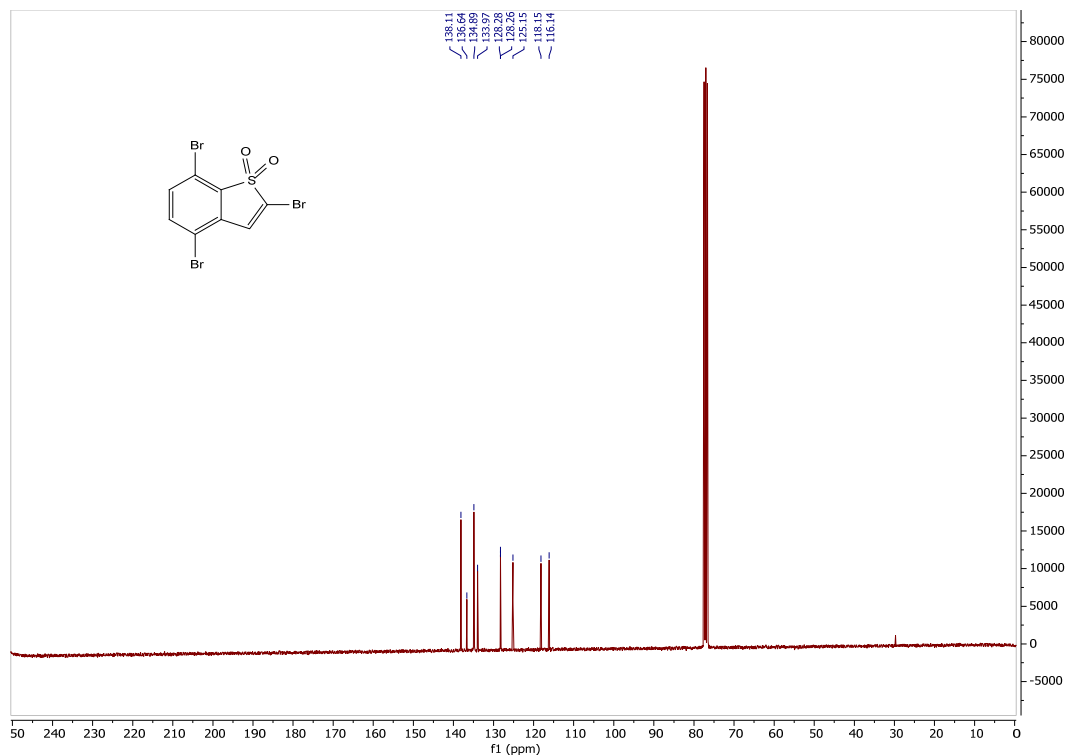

Figure S 12:  $^{13}\text{C}$  NMR spectrum of 4-BtSO<sub>2</sub>

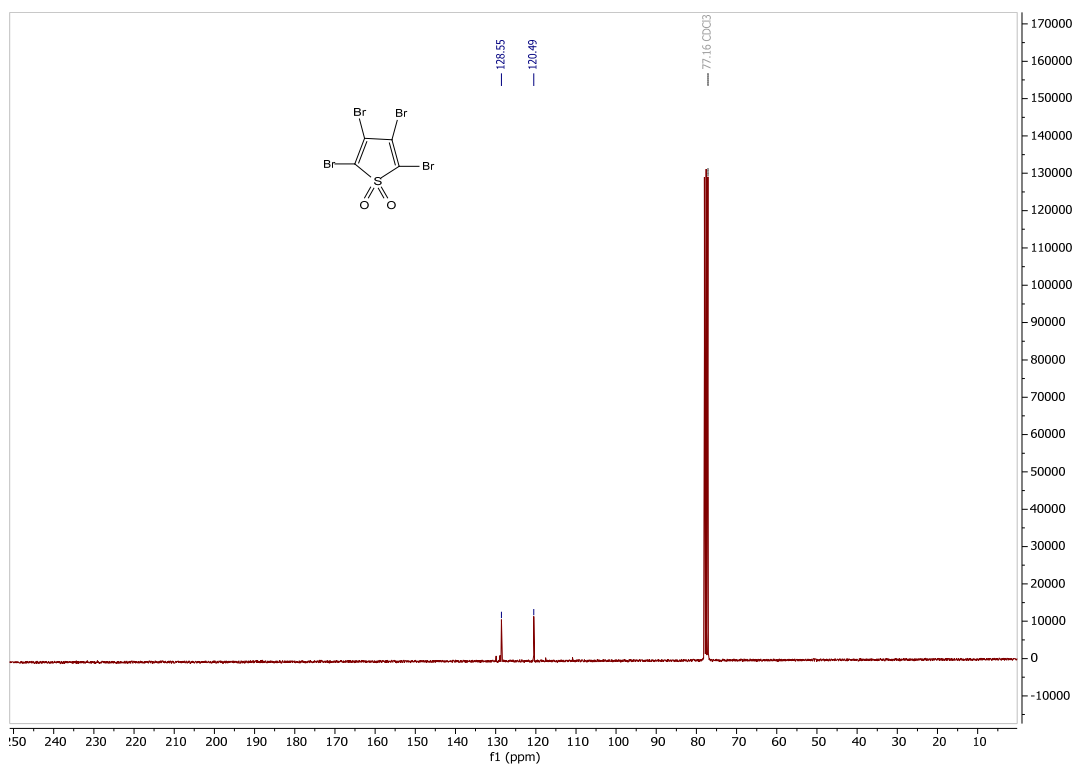

Figure S 13:  $^{13}\text{C}$  NMR spectrum of 5-SO<sub>2</sub>

## X-ray structures

X-ray single-crystal diffraction data were collected at 293K on a BRUKER-NONIUS KappaCCD diffractometer equipped with a graphite monochromator utilizing MoK $\alpha$  radiation ( $\lambda = 0.71073\text{\AA}$ ). The structures were solved by direct methods using SIR92 (Altomare et al., 1993) and the two refinements were performed on  $F^2$  by full matrix least-squares techniques using SHELX-97 package (G.M. Sheldrick, 1998). All non-H atoms were refined anisotropically and the H atoms were included in the calculation without refinement. Absorption was corrected by Sadabs program (Sheldrick, Bruker, 2000).

### X-ray structure of **1-CySO**

Colorless plate (0.150 x 0.092 x 0.021 mm); C<sub>8</sub> H<sub>4</sub> Br<sub>4</sub> O<sub>2</sub> S<sub>2</sub>; Monoclinic, P 2<sub>1</sub>/n; a = 11.4291(6) Å b = 19.1658(7) Å c = 11.4923(7) Å . Volume 2495.0(2) Å<sup>3</sup>; Z 8 Calculated density 2.747 g/cm<sup>3</sup>; Absorption coefficient 18.748 mm<sup>-1</sup>; F(000)1920; Theta range for data collection from 4.516 to 78.446 deg. Limiting indices -13<=h<=14, -23<=k<=20, -14<=l<=12; Reflections collected / unique 14452 / 4919 [R(int) = 0.0940]; Completeness to theta = 68.000 98.0 %; Max. and min. transmission 1.00000 and 0.68195; Refinement method Full-matrix least-squares on  $F^2$ ; Data / restraints / parameters 4919 / 0 / 290; Goodness-of-fit on  $F^2$  1.070; Final R indices [ $I > 2\sigma(I)$ ] R1 = 0.0692, wR2 = 0.1875 [3211 Fo]; R indices (all data) R1 = 0.1024, wR2 = 0.2105; Extinction coefficient 0.00074(10); Largest diff. peak and hole 1.018 and -1.323 e. Å<sup>-3</sup>.

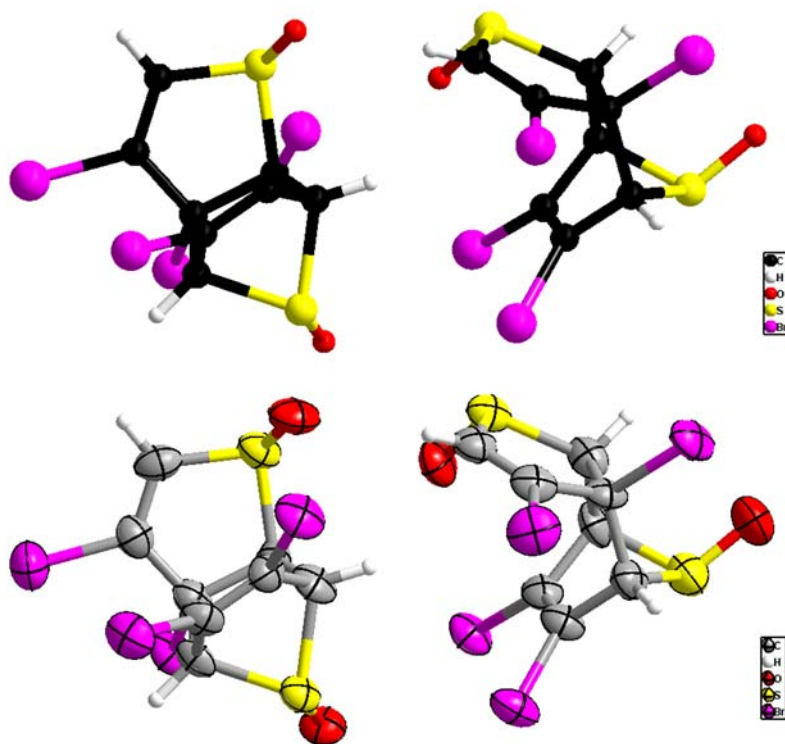

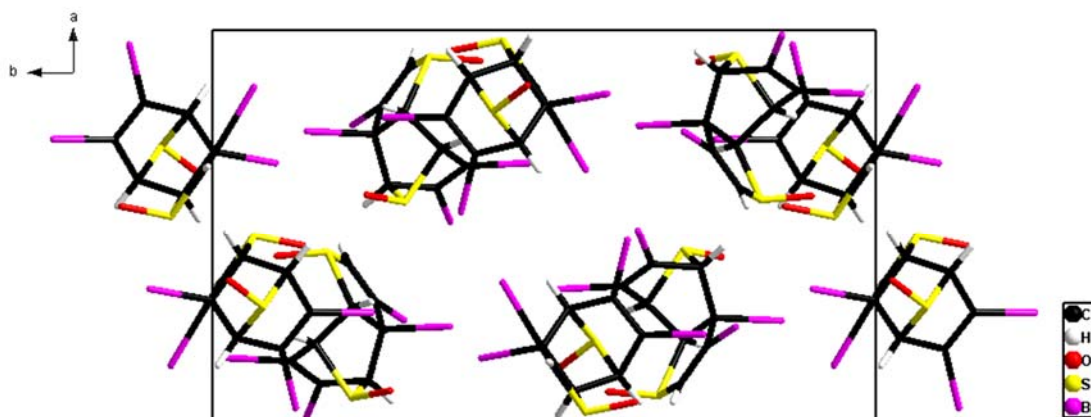

### X-ray structure of 2-Cymix

Colorless plate (0.237 x 0.151 x 0.038 mm); Orthorhombic,  $Pbcn$ ;  $a = 25.0891(6)$  Å  $b = 9.7366(2)$  Å  $c = 9.1903(2)$  Å. Volume 2245.03(9) Å<sup>3</sup>;  $Z$  8; Calculated density 2.213 mg/cm<sup>3</sup>; Absorption coefficient 12.534 mm<sup>-1</sup>;  $F(000)$  1440; Theta range for data collection from 3.523 to 76.203 deg.; Limiting indices  $-30 \leq h \leq 31$ ,  $-10 \leq k \leq 12$ ,  $-9 \leq l \leq 11$ ; Reflections collected / unique 6496 / 2255 [ $R(\text{int}) = 0.0305$ ]; Completeness to theta = 70.000 98.0%; Max. and min. transmission 1.00000 and 0.35601; Refinement method Full-matrix least-squares on  $F^2$ ; Data / restraints / parameters 2255 / 0 / 136 Goodness-of-fit on  $F^2$  1.040; Final  $R$  indices [ $I > 2\sigma(I)$ ]  $R_1 = 0.0307$ ,  $wR_2 = 0.0782$  [2063  $F_o$ ];  $R$  indices (all data)  $R_1 = 0.0340$ ,  $wR_2 = 0.0807$ ; Largest diff. peak and hole 0.556 and  $-0.450$  e.Å<sup>-3</sup>.

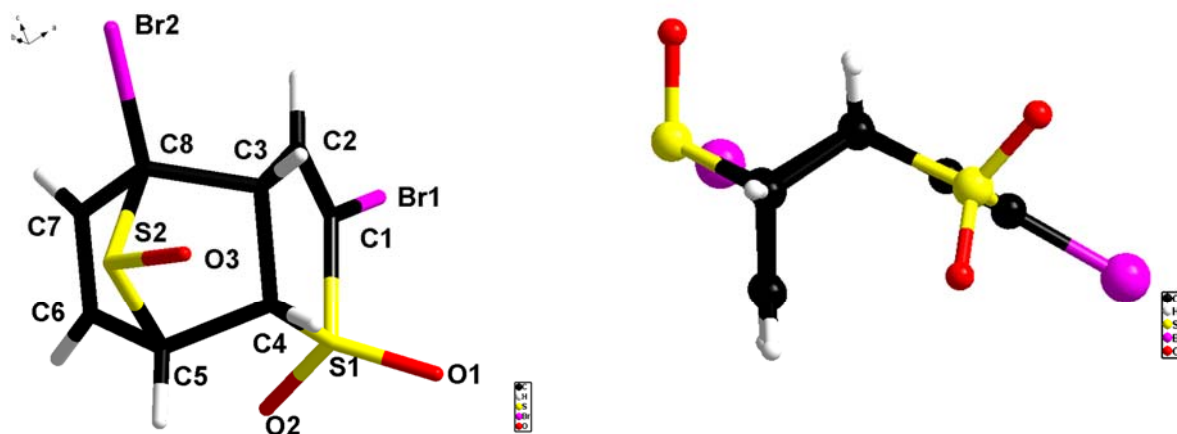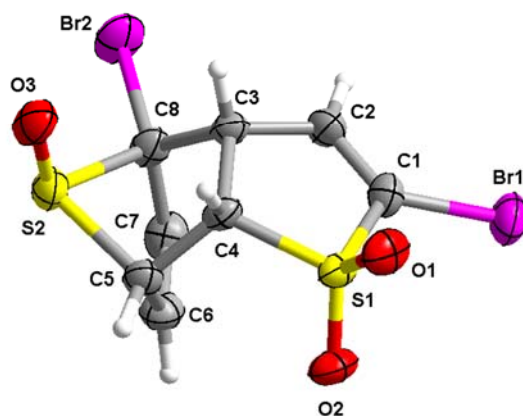

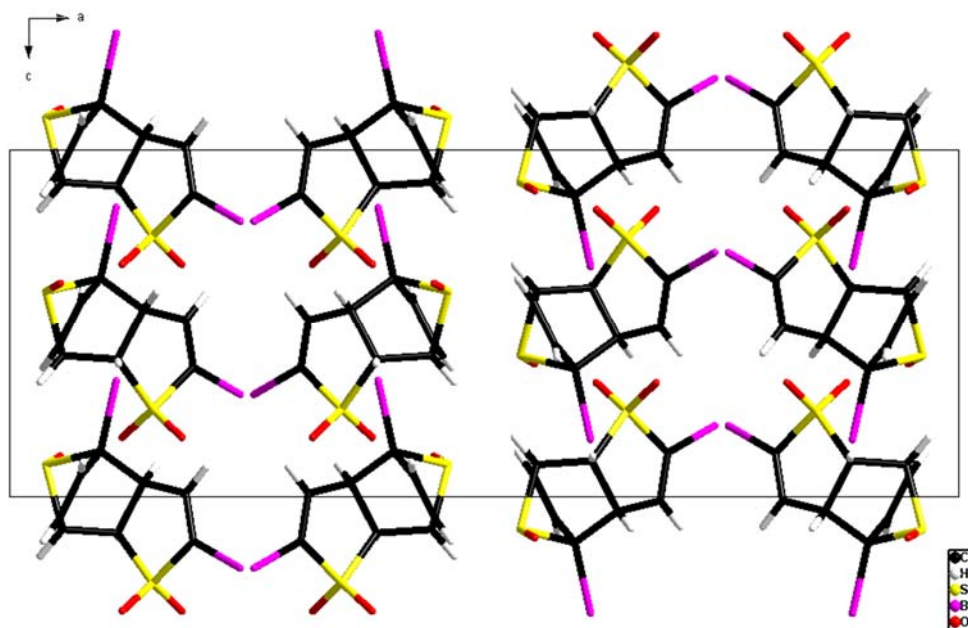

### X-ray structure of **3-Cymix**

Colorless prism (0.313 x 0.298 x 0.157 mm); Monoclinic,  $P 2_1/n$ ; Unit cell dimensions  $a = 7.8922(6) \text{ \AA}$   $b = 10.1295(7) \text{ \AA}$   $c = 14.0460(10) \text{ \AA}$ ; Volume  $1107.29(14) \text{ \AA}^3$ ;  $Z$  4; Calculated density  $2.244 \text{ g/cm}^3$ ; Absorption coefficient  $12.707 \text{ mm}^{-1}$ ;  $F(000)$  720; Theta range for data collection from  $5.410$  to  $76.168$  deg; Limiting indices  $-9 \leq h \leq 9$ ,  $-11 \leq k \leq 12$ ,  $-17 \leq l \leq 16$ ; Reflections collected / unique 4877 / 2246 [ $R(\text{int}) = 0.0443$ ]; Completeness to theta =  $74.000$   $98.2\%$ ; Max. and min. transmission  $1.00000$  and  $0.44962$ ; Refinement method Full-matrix least-squares on  $F^2$ ; Data / restraints / parameters  $2246 / 0 / 136$ ; Goodness-of-fit on  $F^2$   $1.058$ ; Final  $R$  indices [ $>2\sigma(I)$ ]  $R1 = 0.0452$ ,  $wR2 = 0.1210$  [2043 Fo];  $R$  indices (all data)  $R1 = 0.0489$ ,  $wR2 = 0.1261$ ; Largest diff. peak and hole  $0.686$  and  $-1.274 \text{ e. \AA}^{-3}$ .

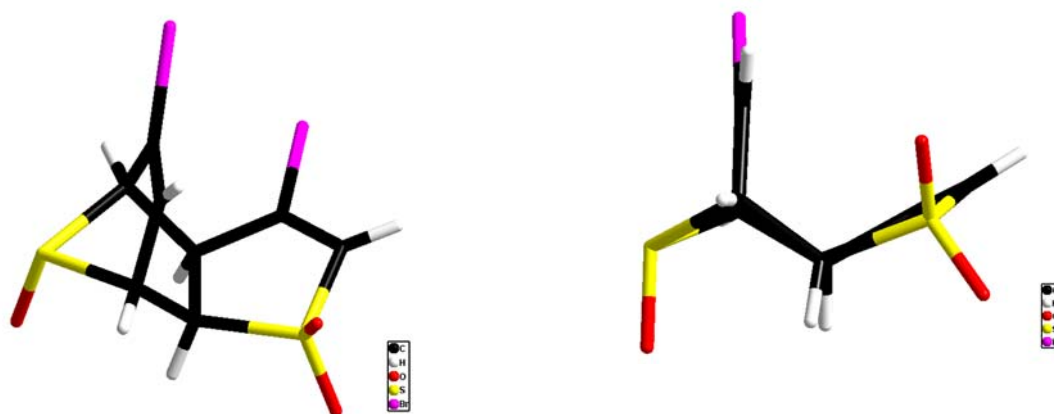

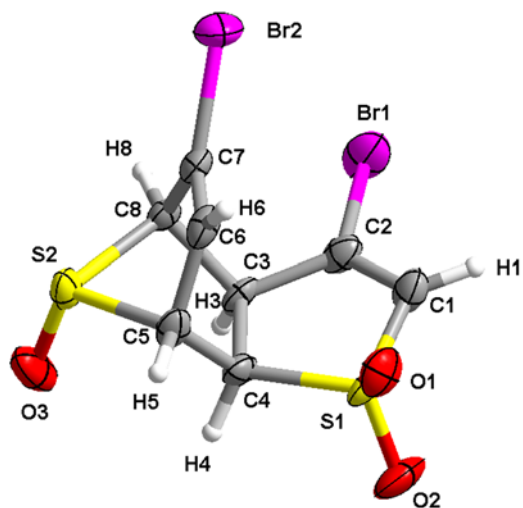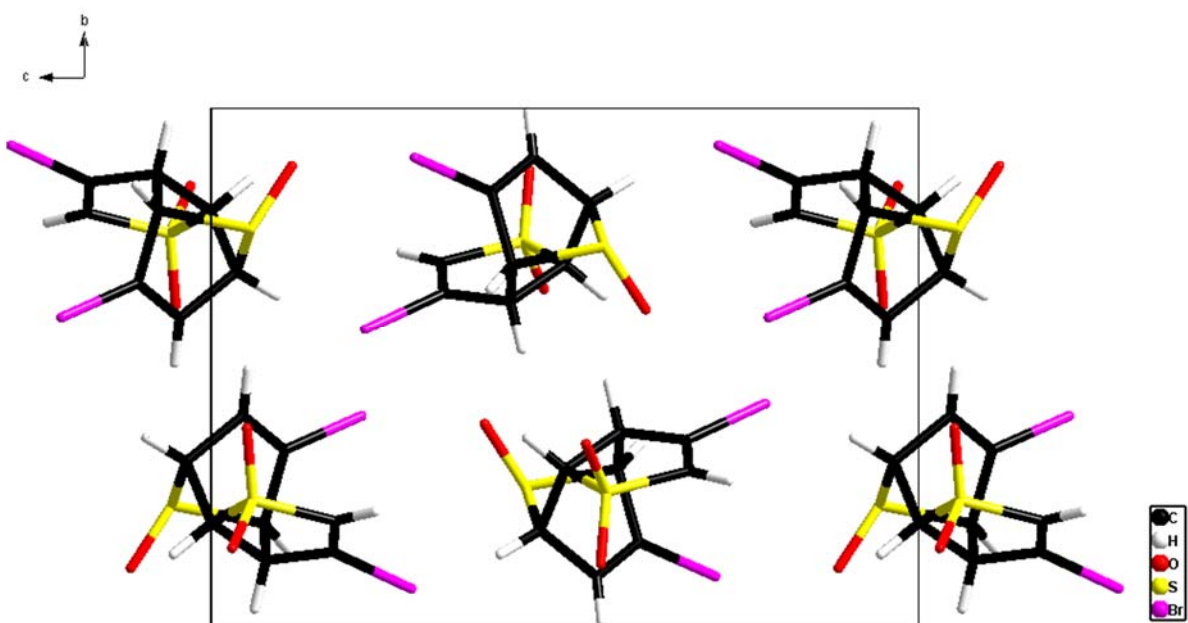



## B- Theoretical Calculations

### Computational details.

All calculated compounds have been optimized in gas phase by a DFT method with the B3LYP<sup>1</sup> hybrid functional since it is very reliable for geometry and thermochemistry and the 6–311G(2d,p) basis set. The Gaussian 09 software (revision D.01) has been used.<sup>2</sup> Normal modes frequencies have then been calculated to control the geometry as a minimum. The molecular orbitals pictures have been automatically generated by a homemade Python program, quchemreport, based on cclib.<sup>34</sup>

---

<sup>1</sup> A. D. Becke, *J. Chem. Phys.*, 1993, **98**, 5648.

<sup>2</sup> M. J. Frisch, G. W. Trucks, H. B. Schlegel, G. E. Scuseria, M. A. Robb, J. R. Cheeseman, G. Scalmani, V. Barone, B. Mennucci, G. A. Petersson, H. Nakatsuji, M. Caricato, X. Li, H. P. Hratchian, A. F. Izmaylov, J. Bloino, G. Zheng, J. L. Sonnenberg, M. Hada, M. Ehara, K. Toyota, R. Fukuda, J. Hasegawa, M. Ishida, T. Nakajima, Y. Honda, O. Kitao, H. Nakai, T. Vreven, J. A. Montgomery Jr., J. E. Peralta, F. Ogliaro, M. Bearpark, J. J. Heyd, E. Brothers, K. N. Kudin, V. N. Staroverov, R. Kobayashi, J. Normand, K. Raghavachari, A. Rendell, J. C. Burant, S. S. Iyengar, J. Tomasi, M. Cossi, N. Rega, J. M. Millam, M. Klene, J. E. Knox, J. B. Cross, V. Bakken, C. Adamo, J. Jaramillo, R. Gomperts, R. E. Stratmann, O. Yazyev, A. J. Austin, R. Cammi, C. Pomelli, J. W. Ochterski, R. L. Martin, K. Morokuma, V. G. Zakrzewski, G. A. Voth, P. Salvador, J. J. Dannenberg, S. Dapprich, A. D. Daniels, Ö. Farkas, J. B. Foresman, J. V. Ortiz, J. Cioslowski and D. J. Fox, *Gaussian ~09 Revision D.01*.

<sup>3</sup> N. M. O'boyle, A. L. Tenderholt and K. M. Langner, *J. Comput. Chem.*, 2008, **29**, 839–845.

<sup>4</sup> T. Cauchy and B. Da Mota, quchemreport. A python program for control quality and automatic generation of quantum chemistry results 2020.

# 1- 3,4-Dibromothiophene 1

## a. Description

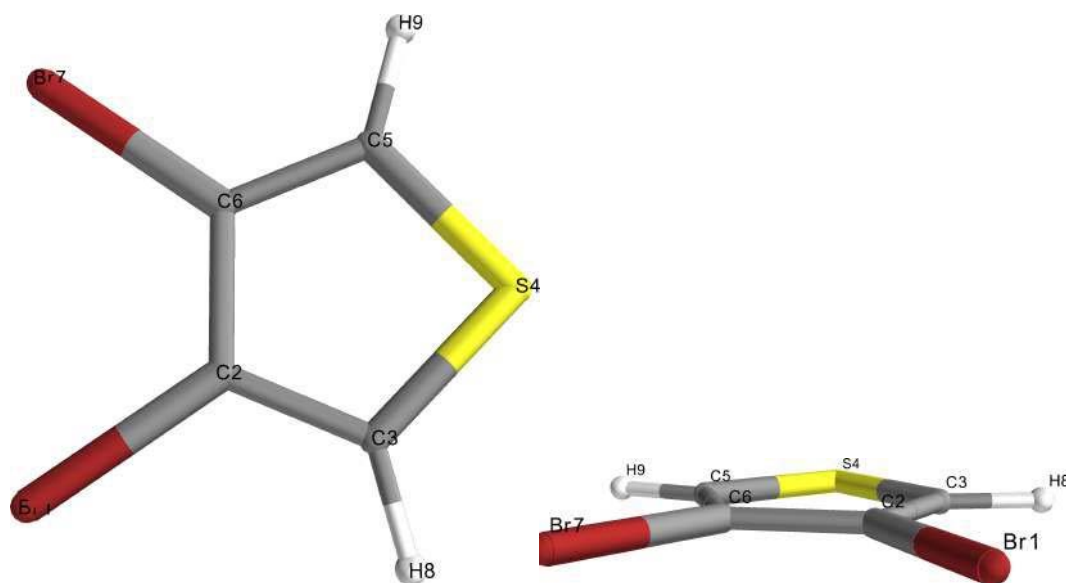

Figure 1: Chemical structure diagram with atomic numbering from two points of view.

|                   |                                    |
|-------------------|------------------------------------|
| Directory name    | 1                                  |
| Formula           | C4H2Br2S                           |
| Charge            | 0                                  |
| Spin multiplicity | 1                                  |
| Monoisotopic mass | 239.82440 Da                       |
| InChI             | 1S/C4H2Br2S/c5-3-1-7-2-4(3)6/h1-2H |
| SMILES            | BrC1csc1Br                         |

## b. Computational details

|                                                         |              |             |
|---------------------------------------------------------|--------------|-------------|
| Software                                                | Gaussian     | (2009+D.01) |
| Computational method                                    | DFT          |             |
| Functional                                              | B3LYP        |             |
| Basis set name                                          | 6-311G(2d,p) |             |
| Number of basis set functions                           | 233          |             |
| Closed shell calculation                                | True         |             |
| Requested SCF convergence on RMS and Max density matrix | 1e-08        | 1e-06       |
| Requested SCF convergence on energy                     | 1e-06        |             |
| Job type: Geometry optimization                         |              |             |
| Max Force value and threshold                           | 0.000153     | 0.000450    |
| RMS Force value and threshold                           | 0.000046     | 0.000300    |
| Max Displacement value and threshold                    | 0.000543     | 0.001800    |
| RMS Displacement value and threshold                    | 0.000240     | 0.001200    |
| Job type: Frequency and thermochemical analysis         |              |             |
| Temperature                                             | 298.15 K     |             |

Anharmonic effects  
Anharmonic effects

None  
None

Job type: Time-dependent calculation  
Number of calculated excited states and spin state

15

['Singlet-A']

## c. Results

|                                                           |                      |                 |
|-----------------------------------------------------------|----------------------|-----------------|
| Total molecular energy                                    | -5700.14795 hartrees |                 |
| HOMO number                                               | 56                   |                 |
| LUMO+1 energies                                           | -0.92 eV             |                 |
| LUMO energies                                             | -1.14 eV             |                 |
| HOMO energies                                             | -6.91 eV             |                 |
| HOMO-1 energies                                           | -6.95 eV             |                 |
| CDFT indices: Electron Affinity                           | -0.0010 hartrees     |                 |
| CDFT indices: Ionisation Potential                        | 0.0119 hartrees      |                 |
| CDFT indices: Electronegativity                           | 0.0054 hartrees      |                 |
| CDFT indices: Hardness                                    | 0.0129 hartrees      |                 |
| CDFT indices: Electrophilicity                            | 0.0011               |                 |
| CDFT indices: Electron-flow                               | 0.4202 e-            |                 |
| Geometry optimization specific results                    |                      |                 |
| Converged nuclear repulsion energy                        | 842.69185 Hartrees   |                 |
| Frequency and Thermochemistry specific results            |                      |                 |
| Enthalpy at 298.15 K                                      | -5700.09353 Hartrees |                 |
| Gibbs free energy at 298.15 K                             | -5700.13530 Hartrees |                 |
| Entropy at 298.15 K                                       | 0.00014 Hartrees     |                 |
| Mean Mulliken atomic charge and standard deviation        | -0.0000 e-           | 0.0930 e-       |
| Atoms with negatives charges under the standard deviation | N 1°                 | Mulliken charge |
|                                                           | C 2                  | -0.116          |
|                                                           | C 6                  | -0.116          |
| Atoms with positives charges over the standard deviation  | N 1°                 | Mulliken charge |
|                                                           | H 8                  | +0.095          |
|                                                           | H 9                  | +0.095          |
|                                                           | S 4                  | +0.138          |

Table. Selection of the most important condensed Fukui functions based on Mulliken charges.

| Atom | atomic dual descriptor ( $f^+ - f^-$ ) | atomic electrophilicity $f^+$ | atomic nucleophilicity $f^-$ |
|------|----------------------------------------|-------------------------------|------------------------------|
| Br 1 | -0.06                                  | 0.18                          | 0.24                         |
| Br 7 | -0.06                                  | 0.18                          | 0.24                         |
| S 4  | 0.10                                   | 0.26                          | 0.16                         |

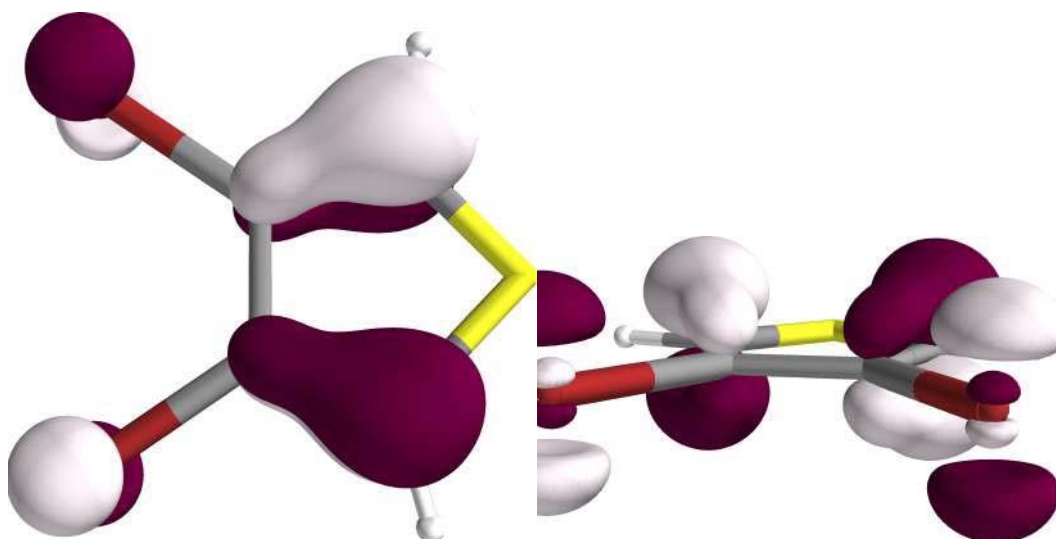

Figure 2: Representation of the HOMO from two points of view.

Table. Most intense (> 50 km/mol) molecular vibrations in wavenumbers

| Frequencies | Intensity | Symmetry |
|-------------|-----------|----------|
| 919         | 52        | A        |
| 797         | 58        | A        |

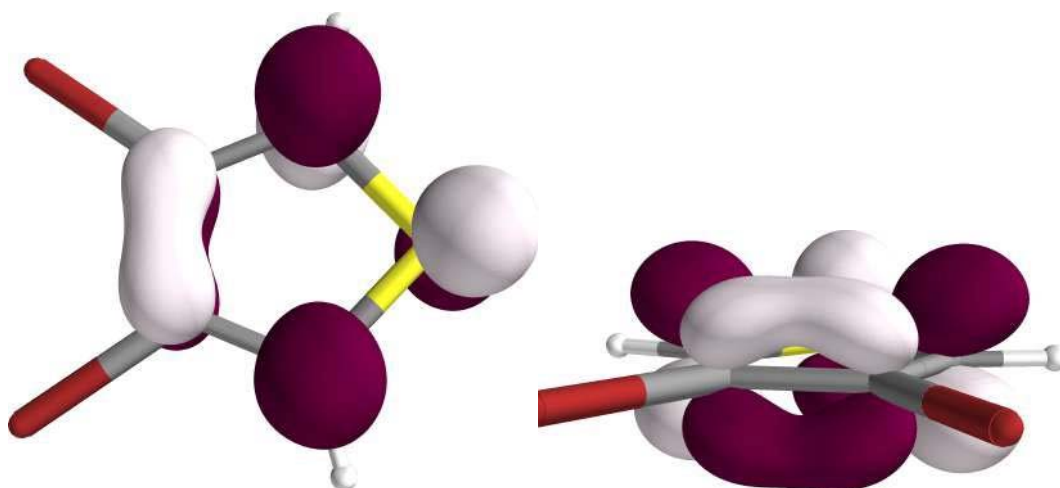

Figure 3: Representation of the LUMO from two points of view.

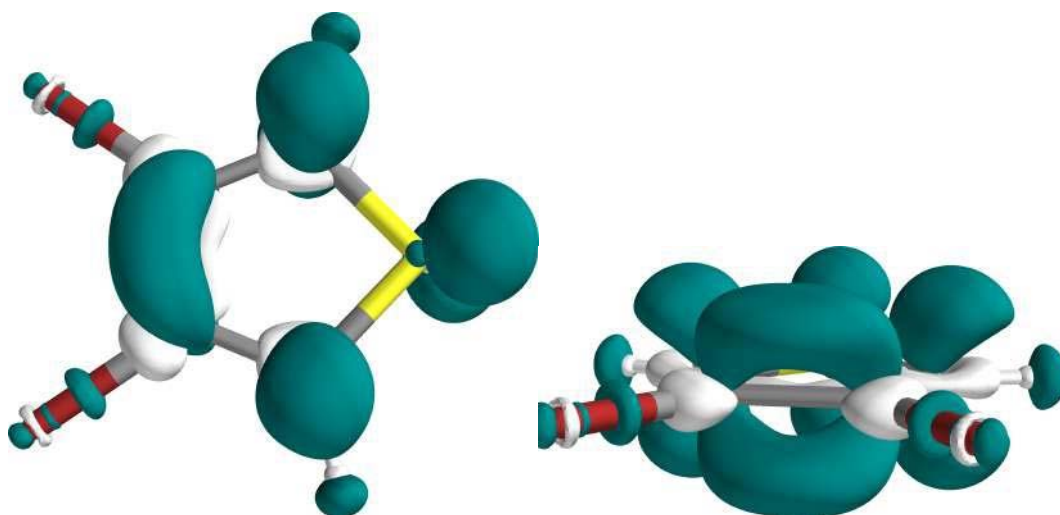

Figure 4: Representation of the F+ function from two points of view. The Blue color indicate the most electrophilic regions.

Table. Results concerning the calculated mono-electronic excitations.

| E.S. | Symmetry  | nm  | cm <sup>-1</sup> | <i>f</i> | R   | Λ    | d <sub>CT</sub> | q <sub>CT</sub> | Excitation description :<br>initial OM - end-ing OM<br>(% if 5%) |
|------|-----------|-----|------------------|----------|-----|------|-----------------|-----------------|------------------------------------------------------------------|
| 1    | Singlet-A | 253 | 39401            | 0.000    | 0.0 | 0.49 | 139.81          | 0.73            | 56-58(96);                                                       |
| 2    | Singlet-A | 250 | 39985            | 0.000    | 0.0 | 0.60 | 127.62          | 0.65            | 55-58(96);                                                       |
| 3    | Singlet-A | 237 | 42144            | 0.107    | 0.0 | 0.65 | 175.57          | 0.52            | 55-57(91); 56-60(6);                                             |
| 4    | Singlet-A | 231 | 43177            | 0.000    | 0.0 | 0.53 | 86.91           | 0.70            | 56-59(96);                                                       |
| 5    | Singlet-A | 230 | 43330            | 0.000    | 0.0 | 0.55 | 118.72          | 0.67            | 55-59(95);                                                       |
| 6    | Singlet-A | 228 | 43738            | 0.017    | 0.0 | 0.75 | 196.69          | 0.39            | 56-57(96);                                                       |
| 7    | Singlet-A | 207 | 48181            | 0.000    | 0.0 | 0.22 | 281.60          | 0.93            | 54-57(99);                                                       |
| 8    | Singlet-A | 206 | 48523            | 0.001    | 0.0 | 0.55 | 111.95          | 0.69            | 54-58(96);                                                       |
| 9    | Singlet-A | 195 | 51216            | 0.002    | 0.0 | 0.31 | 280.92          | 0.87            | 53-57(98);                                                       |
| 10   | Singlet-A | 194 | 51442            | 0.003    | 0.0 | 0.55 | 158.40          | 0.68            | 53-58(71); 54-59(24);                                            |
| 11   | Singlet-A | 185 | 53990            | 0.003    | 0.0 | 0.49 | 19.71           | 0.70            | 56-61(93);                                                       |
| 12   | Singlet-A | 184 | 54101            | 0.000    | 0.0 | 0.55 | 23.97           | 0.65            | 51-59(6); 52-58(13); 55-61(78);                                  |
| 13   | Singlet-A | 184 | 54252            | 0.001    | 0.0 | 0.49 | 251.82          | 0.73            | 53-58(26); 54-59(67);                                            |
| 14   | Singlet-A | 179 | 55811            | 0.107    | 0.0 | 0.65 | 37.78           | 0.55            | 55-60(89);                                                       |
| 15   | Singlet-A | 178 | 56141            | 0.000    | 0.0 | 0.58 | 31.54           | 0.63            | 52-58(83); 55-61(14);                                            |

Table. Converged cartesian atomic coordinates in Angstroms

| Atom | X       | Y       | Z       |
|------|---------|---------|---------|
| Br   | 1.0984  | 1.7867  | 0.0000  |
| C    | -0.4651 | 0.7138  | 0.0000  |
| C    | -1.7179 | 1.2402  | 0.0000  |
| S    | -2.9183 | -0.0000 | -0.0000 |
| C    | -1.7179 | -1.2402 | 0.0000  |
| C    | -0.4651 | -0.7138 | 0.0000  |
| Br   | 1.0984  | -1.7867 | 0.0000  |
| H    | -1.9980 | 2.2798  | 0.0000  |
| H    | -1.9980 | -2.2798 | 0.0000  |

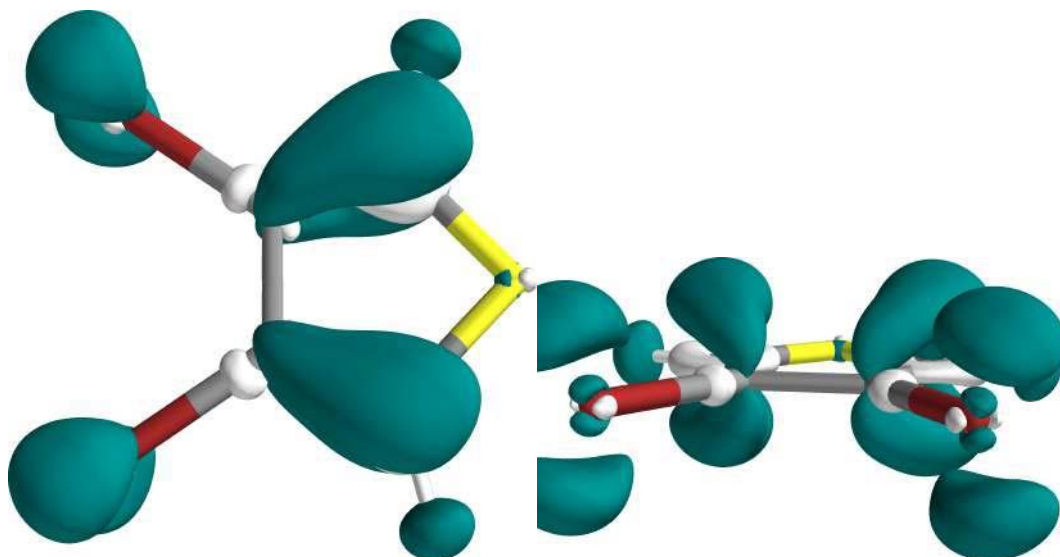

Figure 5: Representation of the F- function from two points of view. The Blue color indicate the most nucleophilic regions.

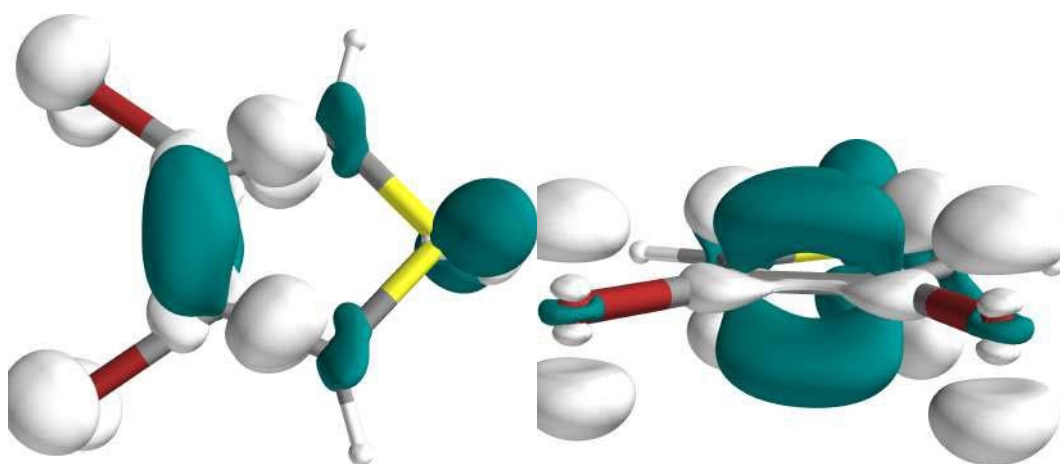

Figure 6: Representation of the Dual descriptor from two points of view. Electrophilic and nucleophilic regions correspond to blue and white surfaces.

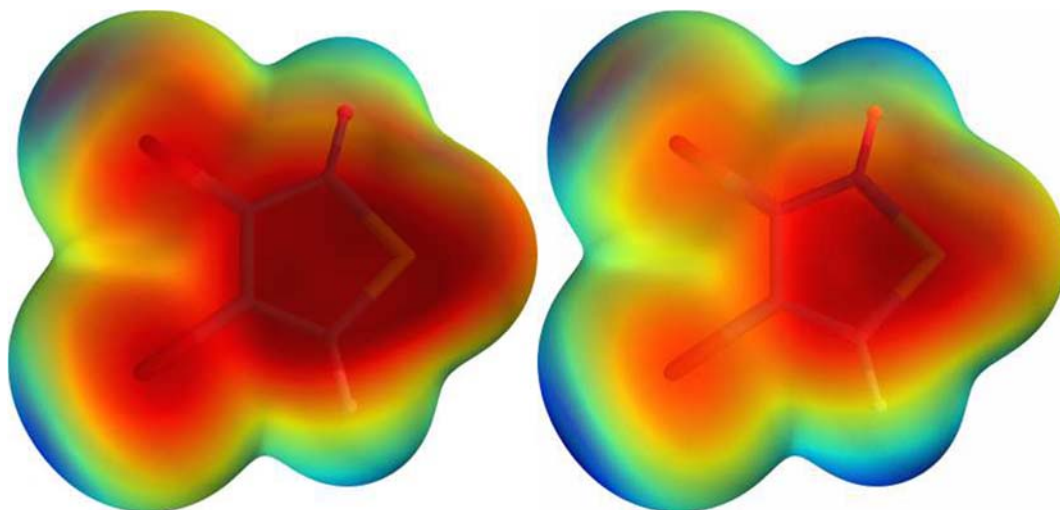

Figure 7: Representations of the Molecular Electrostatic Potential mapped on the electron density (cutoff value of

$0.002 \text{ e}^-/\text{bohr}^3$ ). On the left, red, blue and green regions correspond to negative values  $< -0.06 \text{ a.u.}$ , positive values  $>$

$0.08 \text{ a.u.}$  and neutral values respectively. On the right, the scale is set automatically to highlight the minimum values in red and the maximum values in blues.



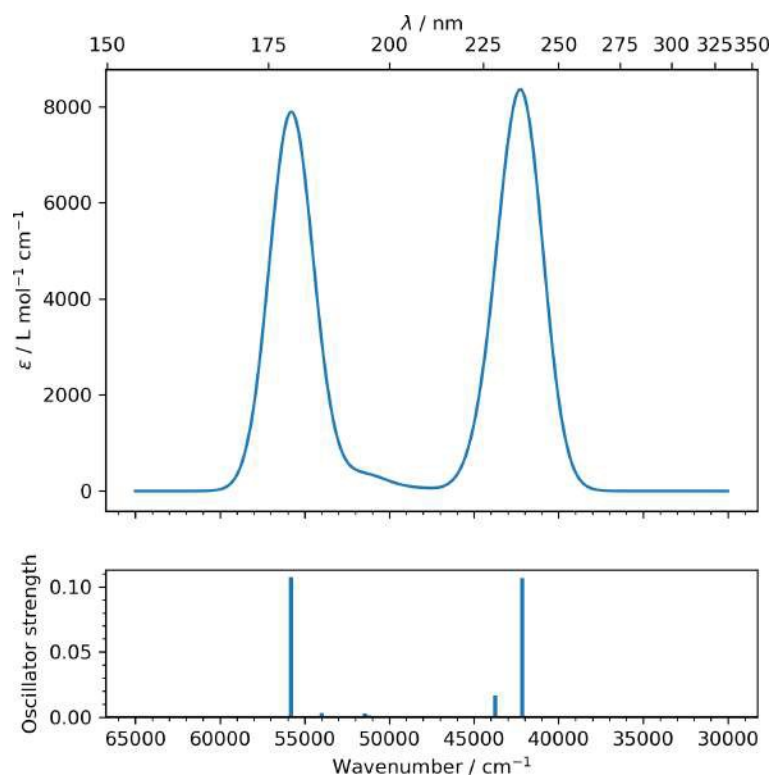

Figure 8: Calculated UV visible Absorption spectrum with a gaussian broadening (FWHM = 3000 cm<sup>-1</sup>)

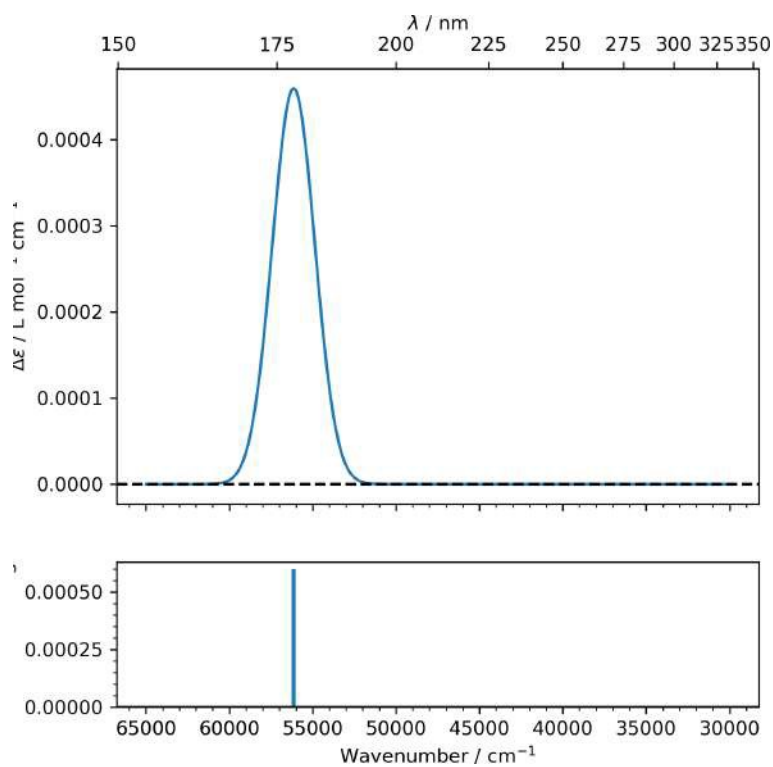

Figure 9: Calculated Circular Dichroism spectrum with a gaussian broadening (FWHM = 3000 cm<sup>-1</sup>)

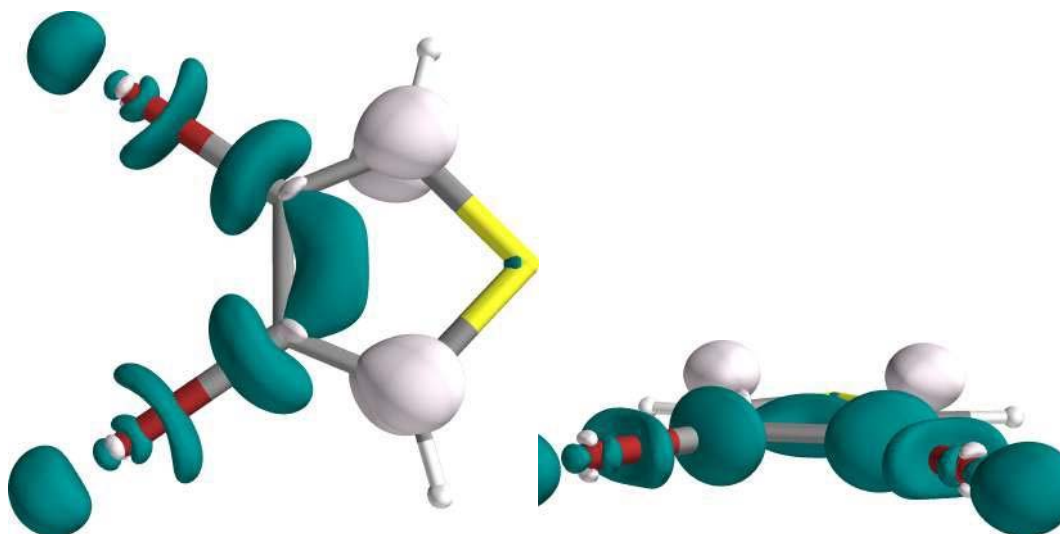

Figure 10: Representation of the Electron Density Difference (S1-S0) from two points of view.

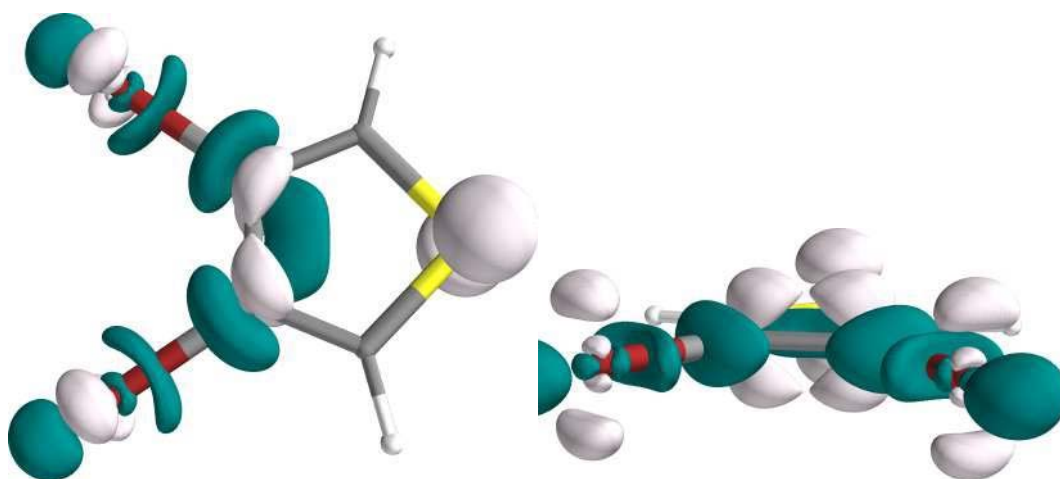

Figure 11: Representation of the Electron Density Difference (S2-S0) from two points of view.

## 2- 3,4-dibromothiophene sulfoxide 1-SO

### a. Description

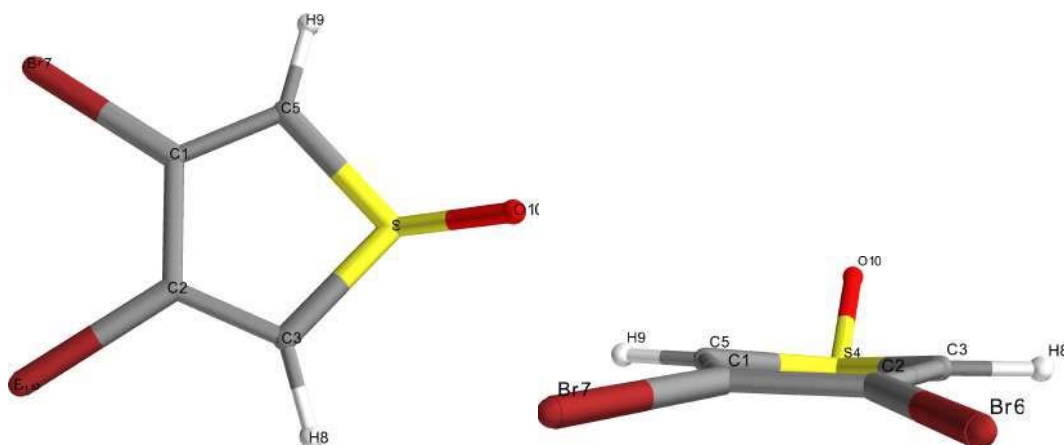

Figure 1: Chemical structure diagram with atomic numbering from two points of view.

|                   |                                       |
|-------------------|---------------------------------------|
| Directory name    | 1-SO                                  |
| Formula           | C4H2Br2OS                             |
| Charge            | 0                                     |
| Spin multiplicity | 1                                     |
| Monoisotopic mass | 255.81931 Da                          |
| InChI             | 1S/C4H2Br2OS/c5-3-1-8(7)2-4(3)6/h1-2H |
| SMILES            | c1(c(cs(=O)c1)Br)Br                   |

### b. Computational details

|                                                         |              |               |
|---------------------------------------------------------|--------------|---------------|
| Software                                                | Gaussian     | (2009+D.01)   |
| Computational method                                    | DFT          |               |
| Functional                                              | B3LYP        |               |
| Basis set name                                          | 6-311G(2d,p) |               |
| Number of basis set functions                           | 256          |               |
| Closed shell calculation                                | True         |               |
| Requested SCF convergence on RMS and Max density matrix | 1e-08        | 1e-06         |
| Requested SCF convergence on energy                     | 1e-06        |               |
| Job type: Geometry optimization                         |              |               |
| Max Force value and threshold                           | 0.000104     | 0.000450      |
| RMS Force value and threshold                           | 0.000033     | 0.000300      |
| Max Displacement value and threshold                    | 0.001386     | 0.001800      |
| RMS Displacement value and threshold                    | 0.000477     | 0.001200      |
| Job type: Frequency and thermochemical analysis         |              |               |
| Temperature                                             | 298.15 K     |               |
| Anharmonic effects                                      | None         |               |
| Anharmonic effects                                      | None         |               |
| Job type: Time-dependent calculation                    |              |               |
| Number of calculated excited states and spin state      | 15           | ['Singlet-A'] |

## c. Results

|                                                           |                      |                 |
|-----------------------------------------------------------|----------------------|-----------------|
| Total molecular energy                                    | -5775.32020 hartrees |                 |
| HOMO number                                               | 60                   |                 |
| LUMO+1 energies                                           | -1.35 eV             |                 |
| LUMO energies                                             | -2.67 eV             |                 |
| HOMO energies                                             | -6.97 eV             |                 |
| HOMO-1 energies                                           | -7.28 eV             |                 |
|                                                           |                      |                 |
| CDFT indices: Electron Affinity                           | 0.0011 hartrees      |                 |
|                                                           |                      |                 |
| CDFT indices: Ionisation Potential                        | 0.0121 hartrees      |                 |
| CDFT indices: Electronegativity                           | 0.0066 hartrees      |                 |
| CDFT indices: Hardness                                    | 0.0111 hartrees      |                 |
| CDFT indices: Electrophilicity                            | 0.0020               |                 |
| CDFT indices: Electron-flow                               | 0.5977 e-            |                 |
|                                                           |                      |                 |
| Geometry optimization specific results                    |                      |                 |
| Converged nuclear repulsion energy                        | 974.68476 Hartrees   |                 |
|                                                           |                      |                 |
| Frequency and Thermochemistry specific results            |                      |                 |
| Enthalpy at 298.15 K                                      | -5775.26175 Hartrees |                 |
| Gibbs free energy at 298.15 K                             | -5775.30658 Hartrees |                 |
| Entropy at 298.15 K                                       | 0.00015 Hartrees     |                 |
|                                                           |                      |                 |
| Mean Mulliken atomic charge and standard deviation        | 0.0000 e-            | 0.2971 e-       |
| Atoms with negatives charges under the standard deviation | N $\hat{A}^\circ$    | Mulliken charge |
|                                                           | O 10                 | -0.621          |
| Atoms with positives charges over the standard deviation  | N $\hat{A}^\circ$    | Mulliken charge |
|                                                           | S 4                  | +0.659          |

Table. Selection of the most important condensed Fukui functions based on Mulliken charges.

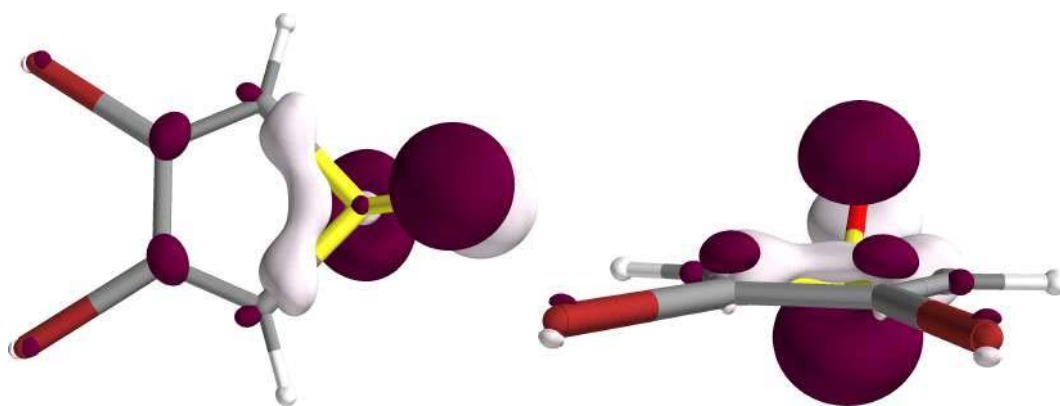

Figure 2: Representation of the HOMO from two points of view.

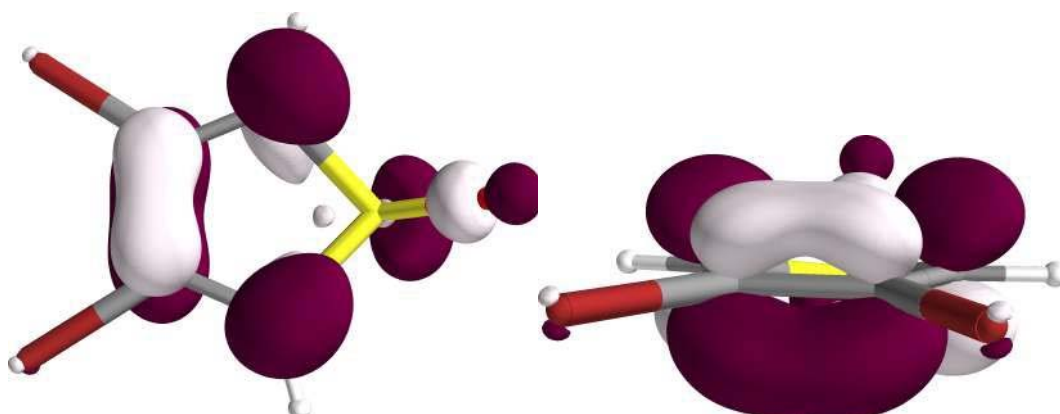

Figure 3: Representation of the LUMO from two points of view.

Table. Most intense (> 50 km/mol) molecular vibrations in wavenumbers

| Frequencies | Intensity | Symmetry |
|-------------|-----------|----------|
| 1267        | 123       | A        |
| 1108        | 95        | A        |
| 1055        | 112       | A        |
| 894         | 78        | A        |
| 815         | 52        | A        |

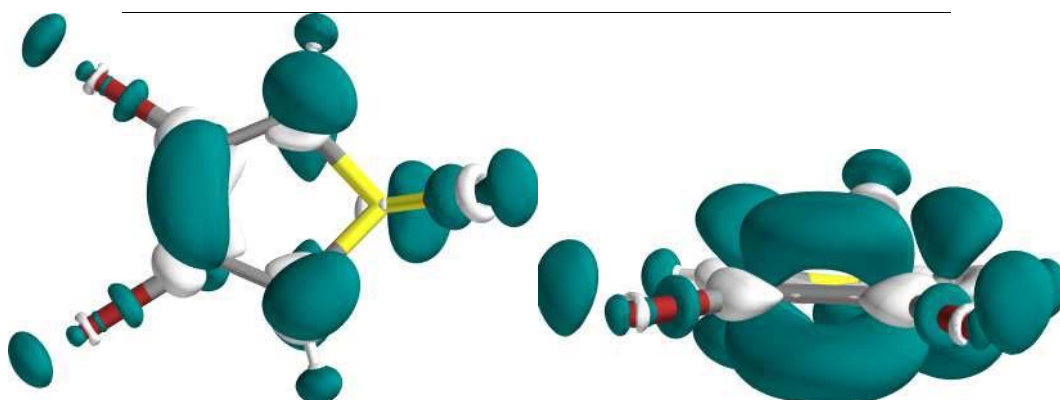

Figure 4: Representation of the F+ function from two points of view. The Blue color indicate the most electrophilic regions.

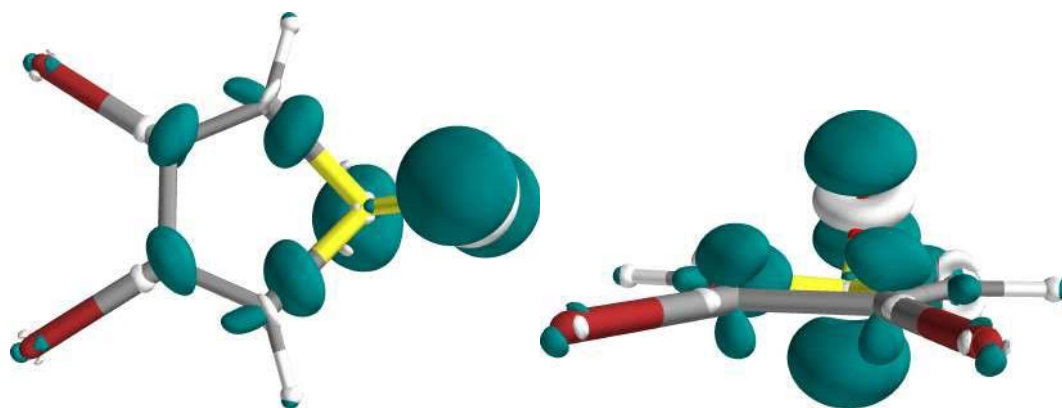

Figure 5: Representation of the F- function from two points of view. The Blue color indicate the most nucleophilic regions.

Table. Results concerning the calculated mono-electronic excitations.

| E.S. | Symmetry  | nm  | cm <sup>-1</sup> | <i>f</i> | R    | Λ    | <i>d<sub>CT</sub></i> | <i>q<sub>C</sub></i> | <i>τ</i> | Excitation description : initial OM - end-ing OM (% if > 5%) |
|------|-----------|-----|------------------|----------|------|------|-----------------------|----------------------|----------|--------------------------------------------------------------|
| 1    | Singlet-A | 379 | 26341            | 0.012    | -0.0 | 0.54 | 194.25                | 0.70                 |          | 60-61(97);                                                   |
| 2    | Singlet-A | 324 | 30825            | 0.000    | -0.1 | 0.74 | 120.04                | 0.49                 |          | 59-61(91);                                                   |
| 3    | Singlet-A | 270 | 36939            | 0.001    | -0.0 | 0.44 | 132.20                | 0.71                 |          | 58-61(88);                                                   |
| 4    | Singlet-A | 258 | 38679            | 0.000    | -0.0 | 0.52 | 199.66                | 0.58                 |          | 57-61(41); 60-62(56);                                        |
| 5    | Singlet-A | 254 | 39236            | 0.001    | -0.0 | 0.51 | 169.40                | 0.69                 |          | 59-62(95);                                                   |
| 6    | Singlet-A | 247 | 40451            | 0.000    | 0.1  | 0.44 | 37.99                 | 0.76                 |          | 56-61(91);                                                   |
| 7    | Singlet-A | 241 | 41459            | 0.152    | 0.1  | 0.53 | 95.41                 | 0.52                 |          | 57-61(49); 60-62(37);                                        |
| 8    | Singlet-A | 231 | 43190            | 0.003    | -0.0 | 0.33 | 278.48                | 0.86                 |          | 55-61(98);                                                   |
| 9    | Singlet-A | 230 | 43435            | 0.035    | -0.3 | 0.54 | 296.38                | 0.61                 |          | 60-63(86);                                                   |
| 10   | Singlet-A | 221 | 45233            | 0.015    | 0.0  | 0.63 | 34.84                 | 0.59                 |          | 57-62(6); 59-63(84);                                         |
| 11   | Singlet-A | 211 | 47322            | 0.000    | 0.0  | 0.54 | 101.03                | 0.65                 |          | 58-62(88);                                                   |
| 12   | Singlet-A | 205 | 48552            | 0.015    | 0.3  | 0.58 | 39.42                 | 0.62                 |          | 57-62(84); 59-63(7);                                         |
| 13   | Singlet-A | 205 | 48746            | 0.079    | -0.4 | 0.62 | 229.53                | 0.58                 |          | 54-61(85);                                                   |
| 14   | Singlet-A | 199 | 50020            | 0.004    | 0.0  | 0.39 | 342.82                | 0.77                 |          | 60-64(95);                                                   |
| 15   | Singlet-A | 192 | 51863            | 0.001    | -0.3 | 0.55 | 60.50                 | 0.60                 |          | 55-62(45); 58-63(42); 59-64(6);                              |

Table. Converged cartesian atomic coordinates in Angstroms

| Atom | X       | Y       | Z       |
|------|---------|---------|---------|
| C    | -0.2173 | -0.7361 | -0.0036 |
| C    | -0.2173 | 0.7358  | -0.0043 |
| C    | -1.4389 | 1.2693  | -0.0528 |
| S    | -2.6749 | -0.0004 | -0.3538 |
| C    | -1.4389 | -1.2697 | -0.0511 |
| Br   | 1.3798  | 1.7595  | 0.0232  |
| Br   | 1.3795  | -1.7595 | 0.0230  |
| H    | -1.7227 | 2.3085  | -0.0831 |
| H    | -1.7222 | -2.3090 | -0.0818 |
| O    | -3.8075 | 0.0012  | 0.6096  |

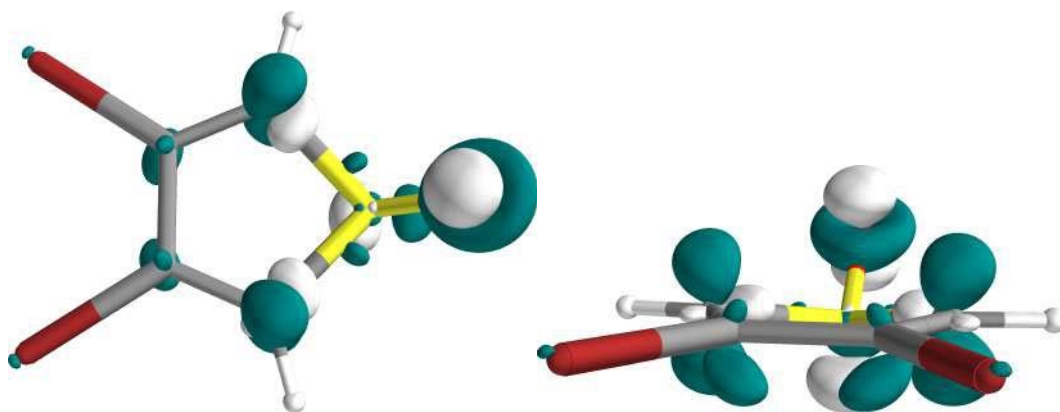

Figure 6: Representation of the Dual descriptor from two points of view. Electrophilic and nucleophilic regions correspond to blue and white surfaces.

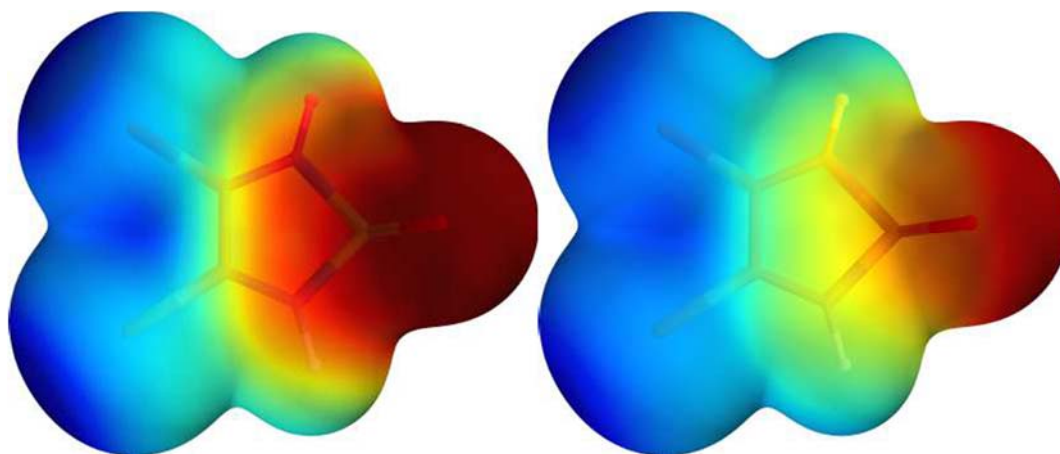

Figure 7: Representations of the Molecular Electrostatic Potential mapped on the electron density (cutoff value of

0.002 e<sup>-</sup>/bohr<sup>3</sup>). On the left, red, blue and green regions correspond to negative values < -0.06 a.u., positive values >

0.08 a.u. and neutral values respectively. On the right, the scale is set automatically to highlight the minimum values in red and the maximum values in blues.

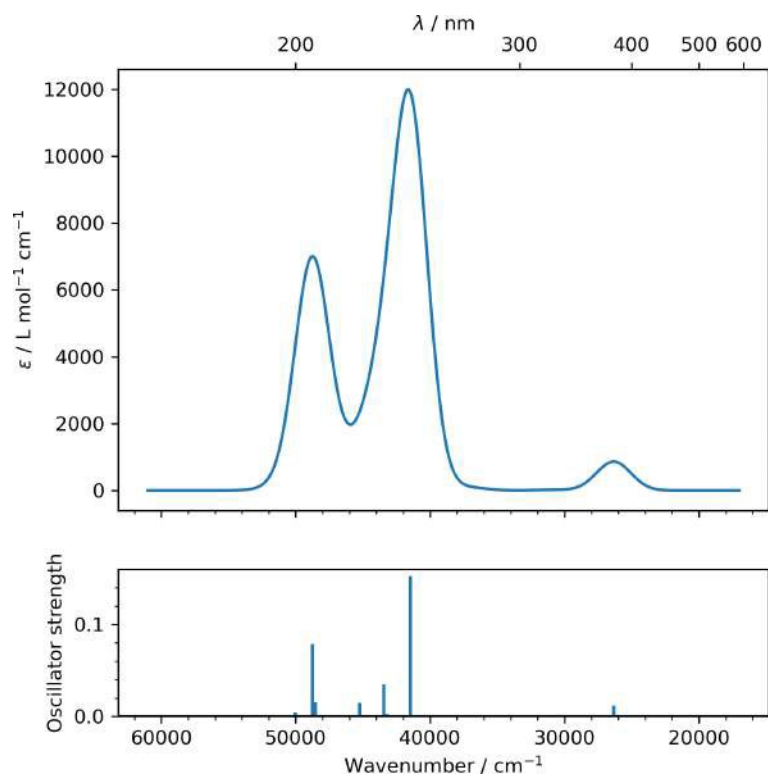

Figure 8: Calculated UV visible Absorption spectrum with a gaussian broadening (FWHM = 3000  $\text{cm}^{-1}$ )

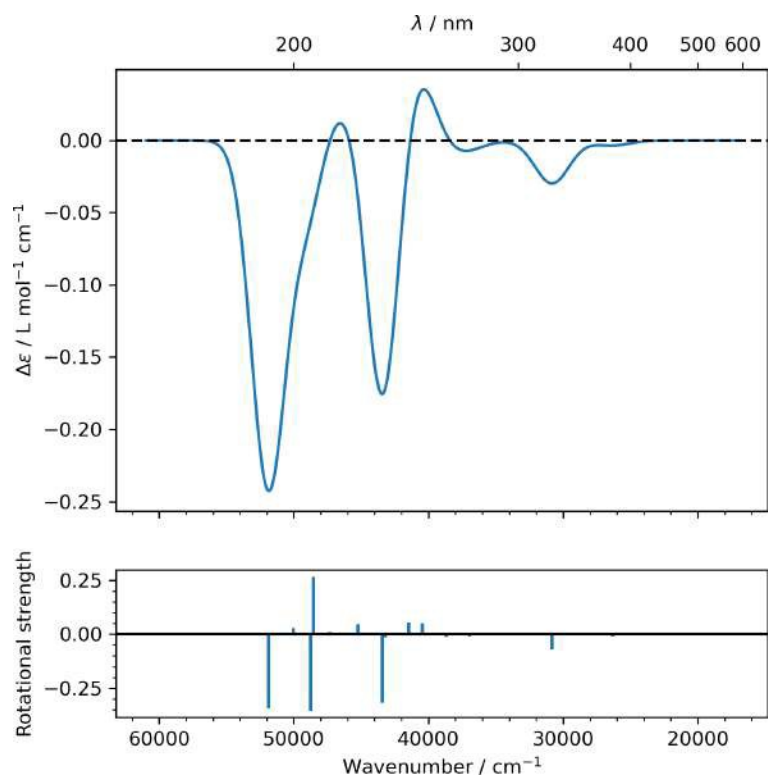

Figure 9: Calculated Circular Dichroism spectrum with a gaussian broadening (FWHM = 3000  $\text{cm}^{-1}$ )



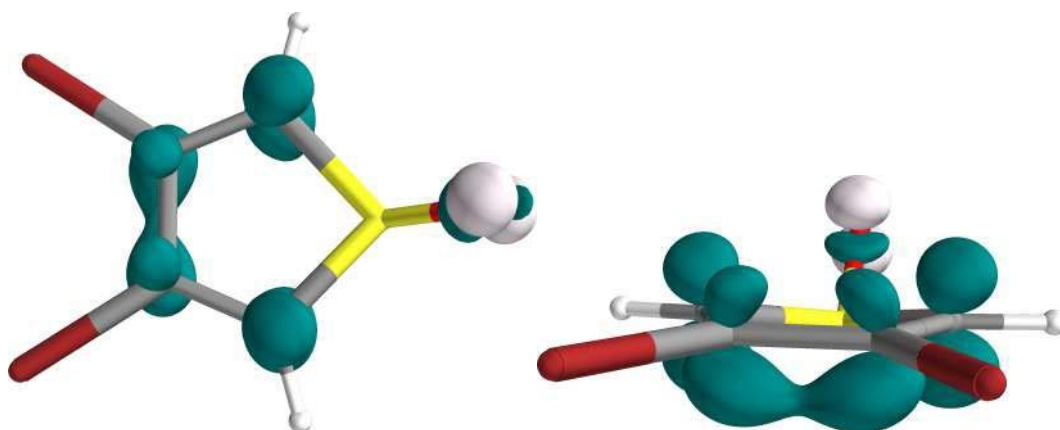

Figure 10: Representation of the Electron Density Difference (S1-S0) from two points of view.

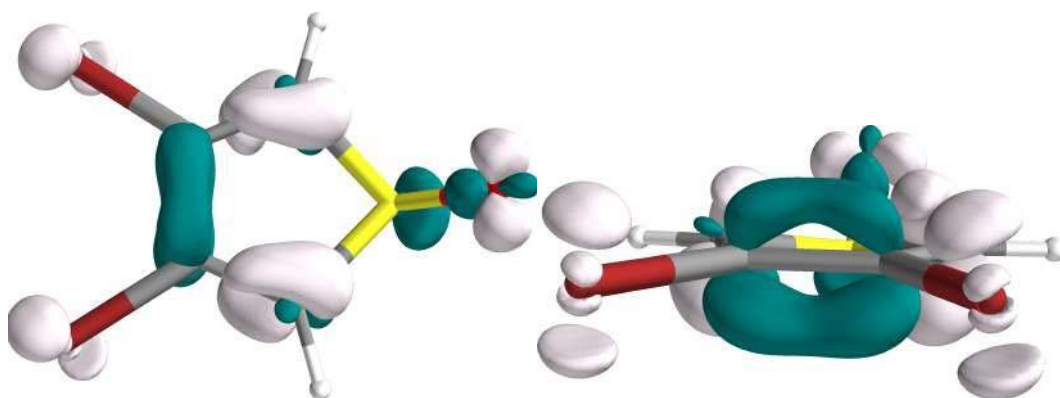

Figure 11: Representation of the Electron Density Difference (S2-S0) from two points of view.

## 3- 3,4-dibromothiophene sulfone 1-SO2

### a. Description

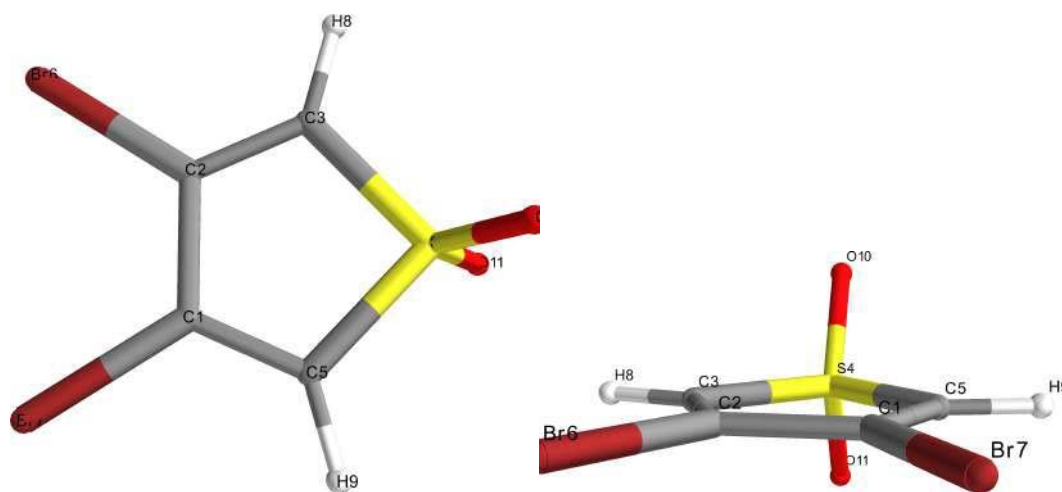

Figure 1: Chemical structure diagram with atomic numbering from two points of view.

|                   |                                          |
|-------------------|------------------------------------------|
| Directory name    | 1-SO2                                    |
| Formula           | C4H2Br2O2S                               |
| Charge            | 0                                        |
| Spin multiplicity | 1                                        |
| Monoisotopic mass | 271.81422 Da                             |
| InChI             | 1S/C4H2Br2O2S/c5-3-1-9(7,8)2-4(3)6/h1-2H |
| SMILES            | C1(=CS(=O)(=O)C=C1Br)Br                  |

### b. Computational details

|                                                         |              |               |
|---------------------------------------------------------|--------------|---------------|
| Software                                                | Gaussian     | (2009+D.01)   |
| Computational method                                    | DFT          |               |
| Functional                                              | B3LYP        |               |
| Basis set name                                          | 6-311G(2d,p) |               |
| Number of basis set functions                           | 279          |               |
| Closed shell calculation                                | True         |               |
| Requested SCF convergence on RMS and Max density matrix | 1e-08        | 1e-06         |
| Requested SCF convergence on energy                     | 1e-06        |               |
| Job type: Geometry optimization                         |              |               |
| Max Force value and threshold                           | 0.000081     | 0.000450      |
| RMS Force value and threshold                           | 0.000017     | 0.000300      |
| Max Displacement value and threshold                    | 0.000355     | 0.001800      |
| RMS Displacement value and threshold                    | 0.000084     | 0.001200      |
| Job type: Frequency and thermochemical analysis         |              |               |
| Temperature                                             | 298.15 K     |               |
| Anharmonic effects                                      | None         |               |
| Anharmonic effects                                      | None         |               |
| Job type: Time-dependent calculation                    |              |               |
| Number of calculated excited states and spin state      | 15           | ['Singlet-A'] |

## c. Results

|                                                           |                      |                 |
|-----------------------------------------------------------|----------------------|-----------------|
| Total molecular energy                                    | -5850.55860 hartrees |                 |
| HOMO number                                               | 64                   |                 |
| LUMO+1 energies                                           | -1.68 eV             |                 |
| LUMO energies                                             | -3.01 eV             |                 |
| HOMO energies                                             | -7.50 eV             |                 |
| HOMO-1 energies                                           | -8.36 eV             |                 |
|                                                           |                      |                 |
| CDFT indices: Electron Affinity                           | 0.0015 hartrees      |                 |
| CDFT indices: Ionisation Potential                        | 0.0127 hartrees      |                 |
| CDFT indices: Electronegativity                           | 0.0071 hartrees      |                 |
| CDFT indices: Hardness                                    | 0.0111 hartrees      |                 |
| CDFT indices: Electrophilicity                            | 0.0023               |                 |
| CDFT indices: Electron-flow                               | 0.6379 e-            |                 |
|                                                           |                      |                 |
| Geometry optimization specific results                    |                      |                 |
| Converged nuclear repulsion energy                        | 1136.05341 Hartrees  |                 |
|                                                           |                      |                 |
| Frequency and Thermochemistry specific results            |                      |                 |
| Enthalpy at 298.15 K                                      | -5850.49421 Hartrees |                 |
| Gibbs free energy at 298.15 K                             | -5850.54054 Hartrees |                 |
| Entropy at 298.15 K                                       | 0.00016 Hartrees     |                 |
|                                                           |                      |                 |
| Mean Mulliken atomic charge and standard deviation        | 0.0000 e-            | 0.4076 e-       |
| Atoms with negatives charges under the standard deviation | N 1°                 | Mulliken charge |
|                                                           | O 10                 | -0.561          |
|                                                           | O 11                 | -0.561          |
| Atoms with positives charges over the standard deviation  | N 1°                 | Mulliken charge |
|                                                           | S 4                  | +1.064          |

Table. Selection of the most important condensed Fukui functions based on Mulliken charges.

| Atom | atomic dual descriptor ( $f^+ - f^-$ ) | atomic electrophilicity $f^+$ | atomic nucleophilicity $f^-$ |
|------|----------------------------------------|-------------------------------|------------------------------|
| Br 7 | -0.05                                  | 0.19                          | 0.24                         |
| Br 6 | -0.05                                  | 0.19                          | 0.24                         |
| S 4  | 0.05                                   | 0.06                          | 0.02                         |

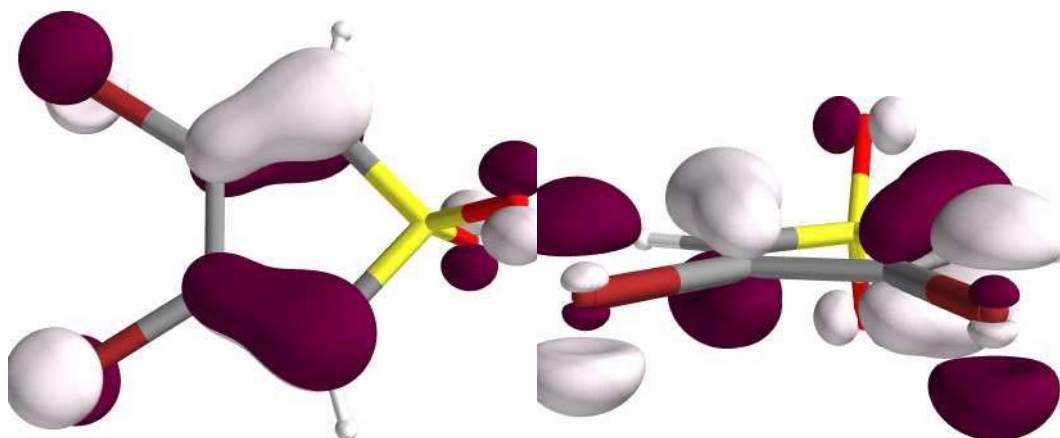

Figure 2: Representation of the HOMO from two points of view.

Table. Most intense (> 50 km/mol) molecular vibrations in wavenumbers

| Frequencies | Intensity | Symmetry |
|-------------|-----------|----------|
| 1587        | 51        | A        |
| 1326        | 166       | A        |
| 1253        | 164       | A        |
| 1143        | 101       | A        |
| 1031        | 77        | A        |
| 929         | 107       | A        |
| 806         | 53        | A        |
| 484         | 66        | A        |

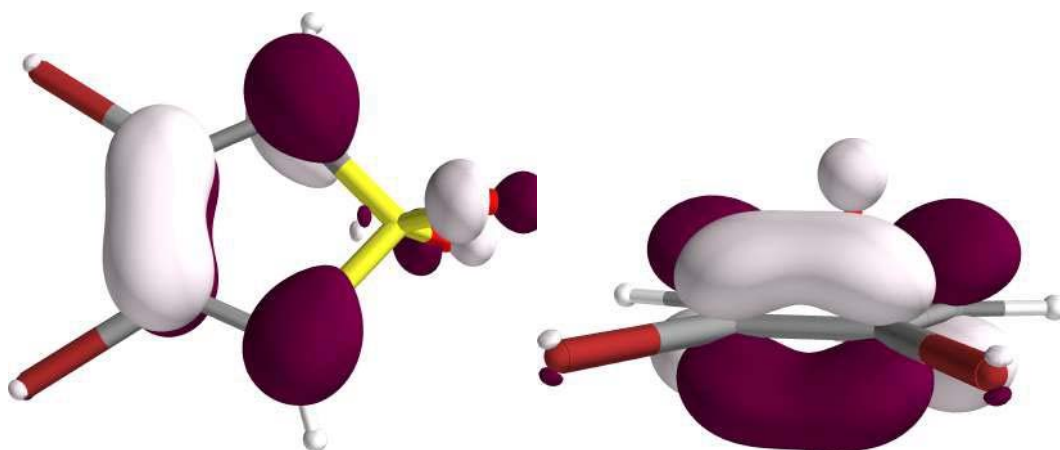

Figure 3: Representation of the LUMO from two points of view.

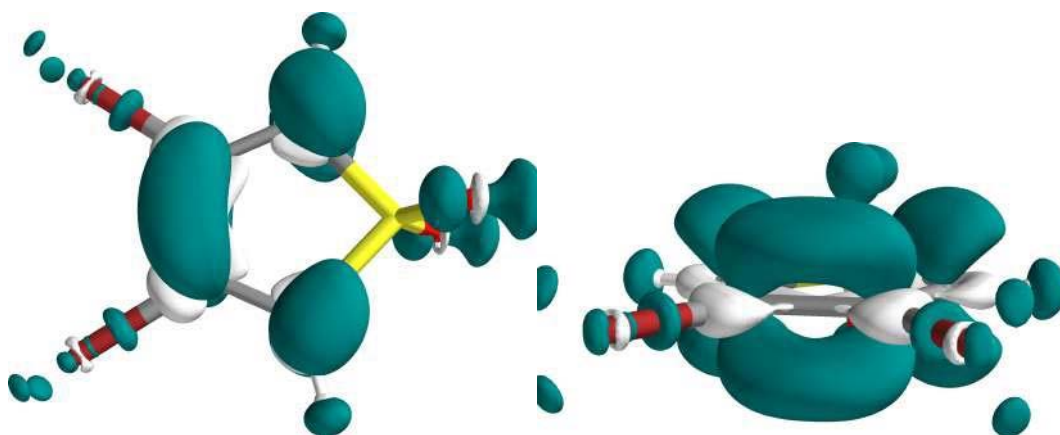

Figure 4: Representation of the F+ function from two points of view. The Blue color indicate the most electrophilic regions.

Table. Results concerning the calculated mono-electronic excitations.

| E.S. | Symmetry  | nm  | cm <sup>-1</sup> | <i>f</i> | R    | Λ    | d <sub>CT</sub> | q <sub>C</sub><br><i>τ</i> | Excitation description : initial<br>OM - end-ing OM (% if > 5%) |
|------|-----------|-----|------------------|----------|------|------|-----------------|----------------------------|-----------------------------------------------------------------|
| 1    | Singlet-A | 321 | 31070            | 0.002    | -0.0 | 0.79 | 100.72          | 0.43                       | 64-                                                             |
|      |           |     |                  |          |      |      |                 |                            | 65(98);                                                         |
| 2    | Singlet-A | 286 | 34855            | 0.000    | 0.0  | 0.42 | 123.77          | 0.81                       | 62-65(96);                                                      |
| 3    | Singlet-A | 262 | 38079            | 0.000    | -0.0 | 0.52 | 163.34          | 0.71                       | 64-66(98);                                                      |
| 4    | Singlet-A | 261 | 38288            | 0.130    | -0.0 | 0.66 | 77.47           | 0.64                       | 63-65(94);                                                      |
| 5    | Singlet-A | 245 | 40760            | 0.000    | 0.0  | 0.48 | 10.28           | 0.76                       | 61-65(95);                                                      |
| 6    | Singlet-A | 237 | 42124            | 0.001    | -0.0 | 0.35 | 251.30          | 0.85                       | 60-65(99);                                                      |
| 7    | Singlet-A | 224 | 44483            | 0.002    | -0.0 | 0.55 | 94.90           | 0.72                       | 59-65(97);                                                      |
| 8    | Singlet-A | 224 | 44517            | 0.002    | 0.0  | 0.49 | 15.36           | 0.73                       | 58-65(91); 62-66(6);                                            |
| 9    | Singlet-A | 220 | 45344            | 0.000    | -0.0 | 0.55 | 167.11          | 0.67                       | 63-66(81); 64-67(16);                                           |
| 10   | Singlet-A | 215 | 46394            | 0.010    | 0.0  | 0.55 | 85.32           | 0.63                       | 62-66(88);                                                      |
| 11   | Singlet-A | 210 | 47484            | 0.004    | 0.0  | 0.50 | 247.05          | 0.65                       | 57-65(85); 64-67(10);                                           |
| 12   | Singlet-A | 204 | 48781            | 0.001    | 0.0  | 0.54 | 225.03          | 0.62                       | 57-65(11); 63-66(15); 64-67(72);                                |
| 13   | Singlet-A | 199 | 50075            | 0.057    | -0.0 | 0.68 | 84.21           | 0.55                       | 56-65(92);                                                      |
| 14   | Singlet-A | 193 | 51801            | 0.002    | -0.0 | 0.58 | 58.23           | 0.64                       | 60-66(85); 62-67(11);                                           |
| 15   | Singlet-A | 189 | 52810            | 0.024    | 0.0  | 0.55 | 245.49          | 0.67                       | 61-66(93);                                                      |

Table. Converged cartesian atomic coordinates in Angstroms

| Atom | X       | Y       | Z       |
|------|---------|---------|---------|
| C    | -0.0330 | 0.7460  | -0.0001 |
| C    | -0.0331 | -0.7462 | 0.0001  |
| C    | -1.2438 | -1.2896 | 0.0001  |
| S    | -2.4871 | 0.0002  | -0.0000 |
| C    | -1.2435 | 1.2898  | -0.0002 |
| Br   | 1.5647  | -1.7522 | -0.0000 |
| Br   | 1.5654  | 1.7519  | 0.0000  |
| H    | -1.5305 | -2.3284 | 0.0001  |
| H    | -1.5301 | 2.3287  | 0.0001  |
| O    | -3.2111 | 0.0003  | 1.2524  |
| O    | -3.2113 | 0.0004  | -1.2523 |

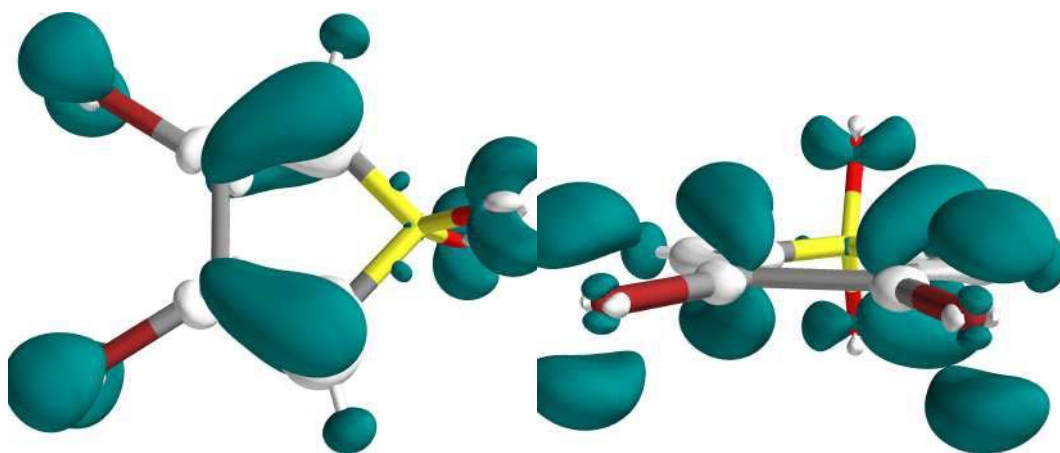

Figure 5: Representation of the F- function from two points of view. The Blue color indicate the most nucleophilic regions.

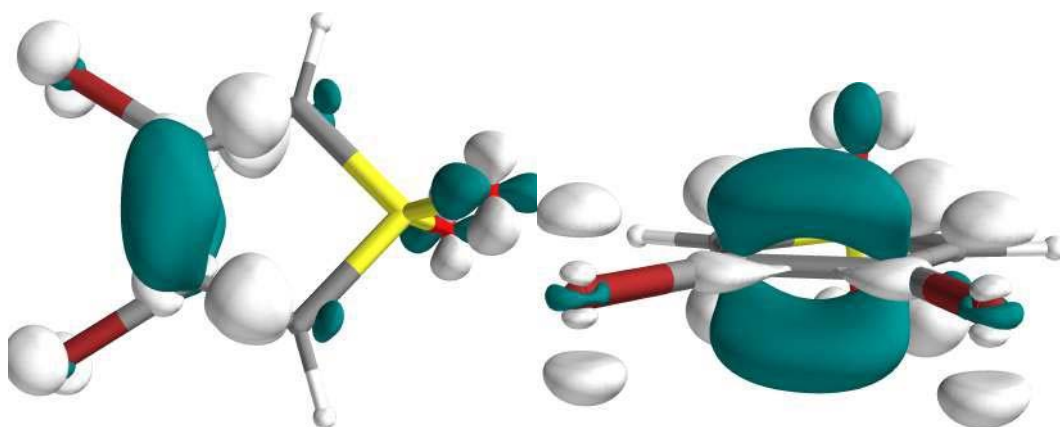

Figure 6: Representation of the Dual descriptor from two points of view. Electrophilic and nucleophilic regions correspond to blue and white surfaces.

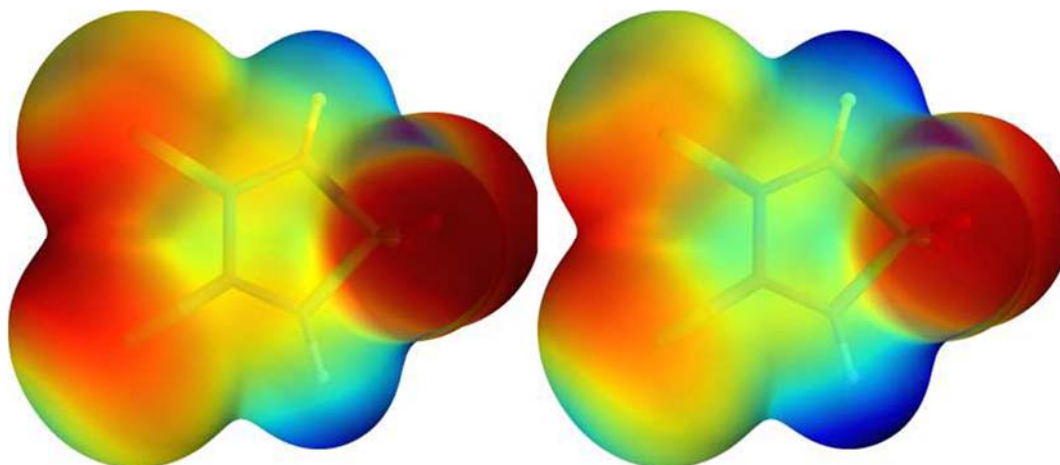

Figure 7: Representations of the Molecular Electrostatic Potential mapped on the electron density (cutoff value of

$0.002 e^-/\text{bohr}^3$ ). On the left, red, blue and green regions correspond to negative values  $< -0.06$  a.u., positive values  $>$

$0.08$  a.u. and neutral values respectively. On the right, the scale is set automatically to highlight the minimum values in red and the maximum values in blues.

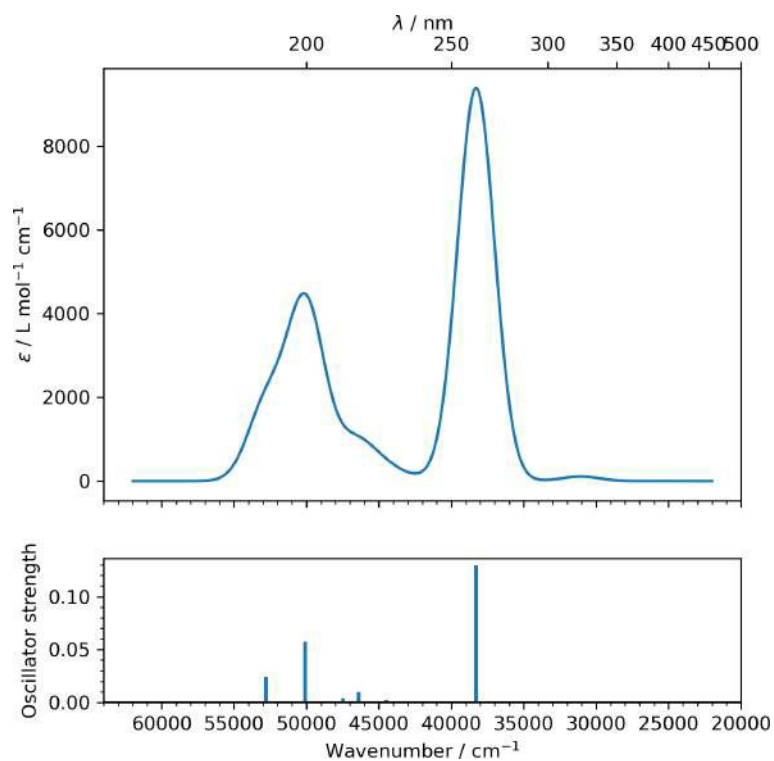

Figure 8: Calculated UV visible Absorption spectrum with a gaussian broadening (FWHM = 3000  $\text{cm}^{-1}$ )

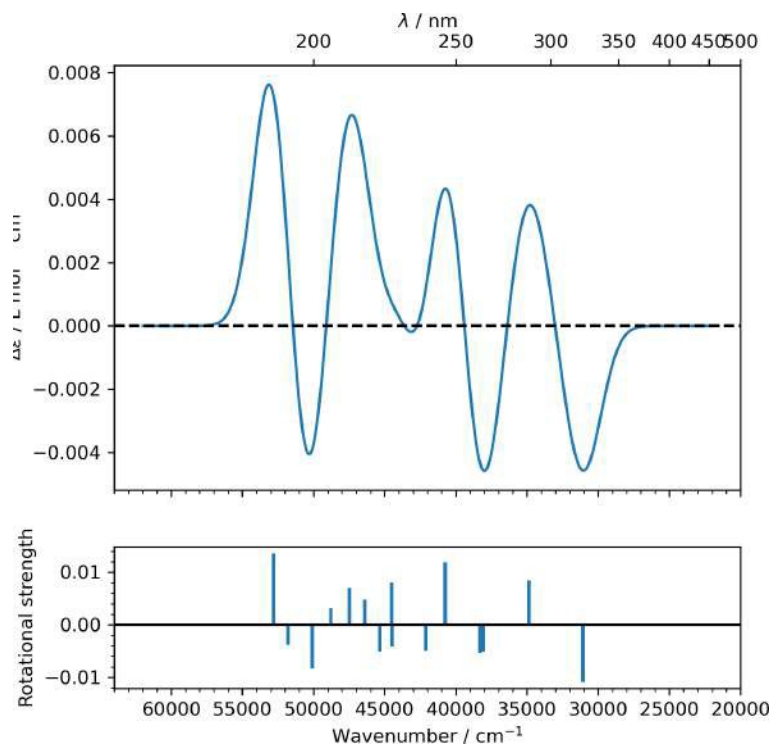

Figure 9: Calculated Circular Dichroism spectrum with a gaussian broadening (FWHM = 3000  $\text{cm}^{-1}$ )



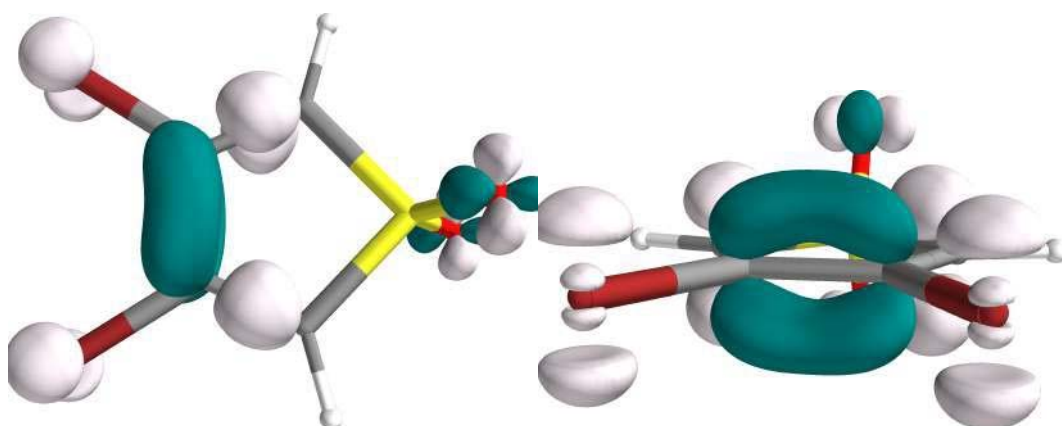

Figure 10: Representation of the Electron Density Difference (S1-S0) from two points of view.

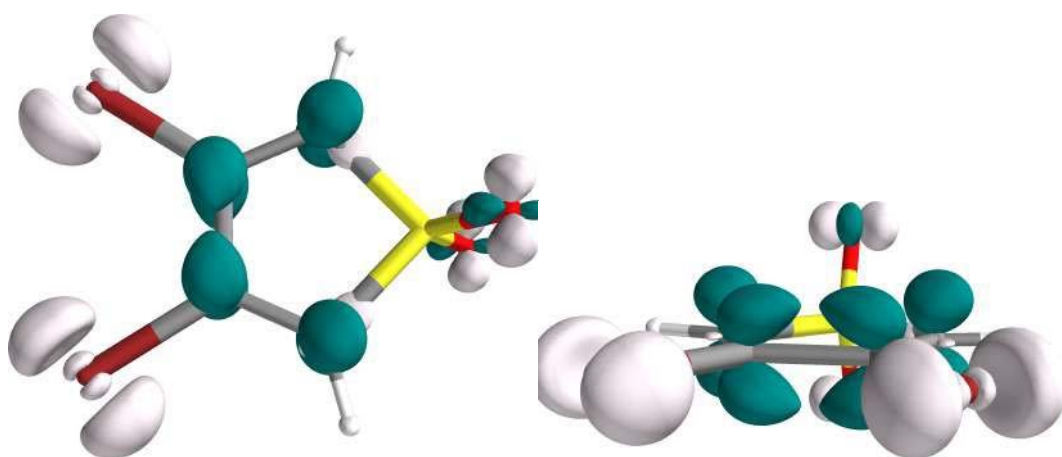

Figure 11: Representation of the Electron Density Difference (S2-S0) from two points of view.

## 4- Cycloadduct sulfoxide 1-CySO

### a- Description

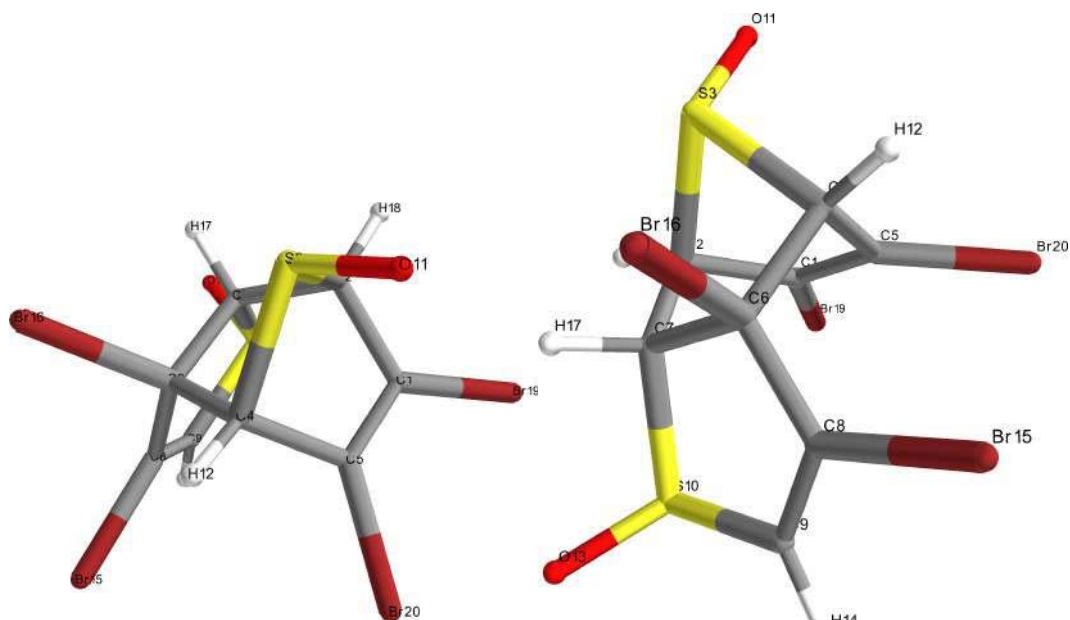

Figure 1: Chemical structure diagram with atomic numbering from two points of view.

|                   |             |
|-------------------|-------------|
| Directory name    | 1-CySO      |
| Formula           | C8H4Br4O2S2 |
| Charge            | 0           |
| Spin multiplicity | 1           |

### b- Computational details

|                                                         |              |             |
|---------------------------------------------------------|--------------|-------------|
| Software                                                | Gaussian     | (2009+D.01) |
| Computational method                                    | DFT          |             |
| Functional                                              | B3LYP        |             |
| Basis set name                                          | 6-311G(2d,p) |             |
| Number of basis set functions                           | 512          |             |
| Closed shell calculation                                | True         |             |
| Requested SCF convergence on RMS and Max density matrix | 1e-08        | 1e-06       |
| Requested SCF convergence on energy                     | 1e-06        |             |
| Job type: Geometry optimization                         |              |             |
| Max Force value and threshold                           | 0.000234     | 0.000450    |
| RMS Force value and threshold                           | 0.000032     | 0.000300    |
| Max Displacement value and threshold                    | 0.000732     | 0.001800    |
| RMS Displacement value and threshold                    | 0.000207     | 0.001200    |
| Job type: Frequency and thermochemical analysis         |              |             |
| Temperature                                             | 298.15 K     |             |
| Anharmonic effects                                      | None         |             |
| Anharmonic effects                                      | None         |             |

## c- Results

|                        |                       |
|------------------------|-----------------------|
| Total molecular energy | -11550.68070 hartrees |
| HOMO number            | 120                   |
| LUMO+1 energies        | -1.99 eV              |
| LUMO energies          | -2.65 eV              |
| HOMO energies          | -7.01 eV              |
| HOMO-1 energies        | -7.15 eV              |

|                                        |                     |
|----------------------------------------|---------------------|
| Geometry optimization specific results |                     |
| Converged nuclear repulsion energy     | 3626.70487 Hartrees |

|                                                |                       |
|------------------------------------------------|-----------------------|
| Frequency and Thermochemistry specific results |                       |
| Enthalpy at 298.15 K                           | -11550.55883 Hartrees |
| Gibbs free energy at 298.15 K                  | -11550.62387 Hartrees |
| Entropy at 298.15 K                            | 0.00022 Hartrees      |

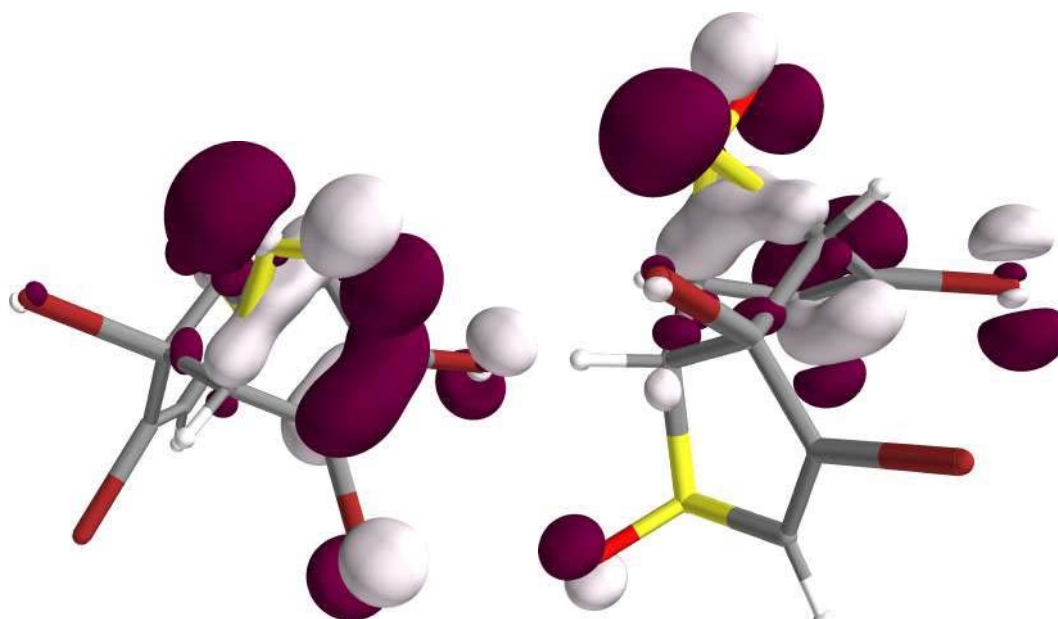

Figure 2: Representation of the HOMO from two points of view.

Table. Most intense (> 50 km/mol) molecular vibrations in wavenumbers

| Frequencies | Intensity | Symmetry |
|-------------|-----------|----------|
| 1621        | 58        | A        |
| 1160        | 98        | A        |
| 1140        | 91        | A        |
| 1097        | 60        | A        |
| 1095        | 97        | A        |
| 856         | 53        | A        |

Table. Converged cartesian atomic coordinates in Angstroms

| Atom | X       | Y       | Z       |
|------|---------|---------|---------|
| C    | -1.7734 | -0.4679 | 0.1689  |
| C    | -1.0008 | -1.7278 | 0.4586  |
| S    | -0.3669 | -1.3669 | 2.2328  |
| C    | 0.1952  | 0.1883  | 1.2481  |
| C    | -1.1008 | 0.6004  | 0.6009  |
| C    | 1.1155  | -0.4764 | 0.1936  |
| C    | 0.3306  | -1.7170 | -0.3074 |
| C    | 1.4660  | 0.3532  | -0.9999 |
| C    | 1.0803  | -0.0848 | -2.1896 |
| S    | 0.1007  | -1.5995 | -2.1859 |
| O    | -1.5007 | -1.0112 | 3.1112  |
| H    | 0.6779  | 0.9305  | 1.8733  |
| O    | 0.8652  | -2.7114 | -2.8134 |
| H    | 1.2573  | 0.3991  | -3.1387 |
| Br   | 2.3802  | 2.0072  | -0.7642 |
| Br   | 2.8383  | -1.0230 | 1.1060  |
| H    | 0.8919  | -2.6423 | -0.2049 |
| H    | -1.5611 | -2.6556 | 0.4047  |
| Br   | -3.4377 | -0.5008 | -0.7096 |
| Br   | -1.6036 | 2.4082  | 0.4505  |

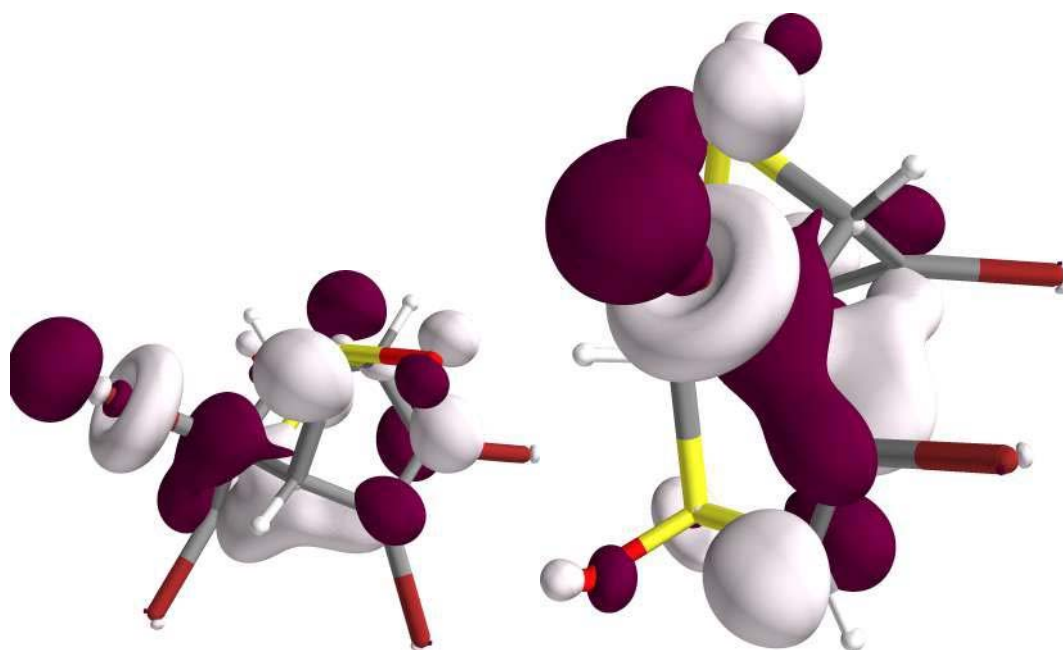

Figure 3: Representation of the LUMO from two points of view.

## 5- Cycloadduct 1-Cymix

### a- Description

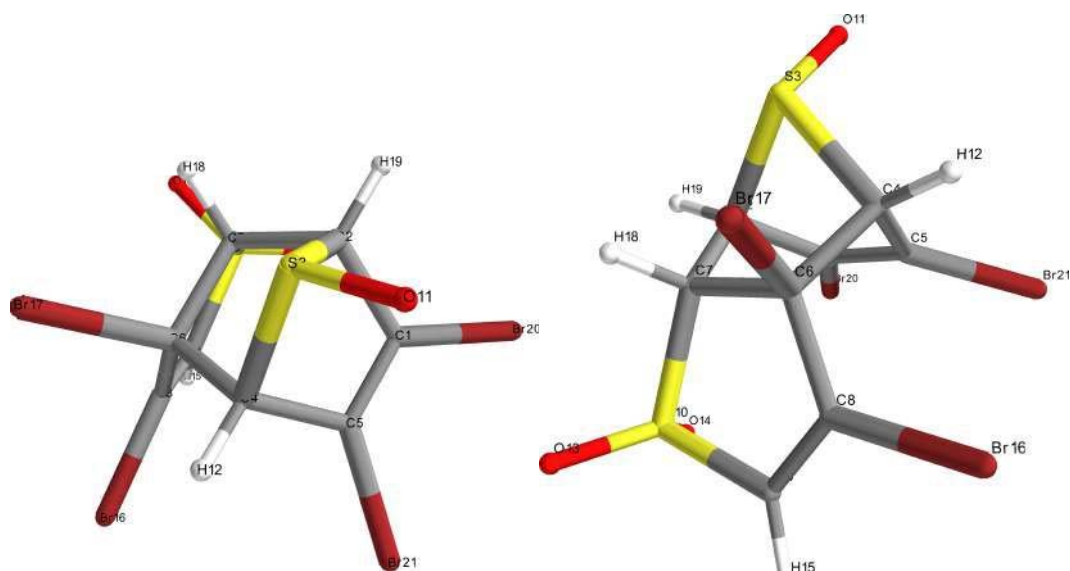

Figure 1: Chemical structure diagram with atomic numbering from two points of view.

|                   |             |
|-------------------|-------------|
| Directory name    | 1-Cymix     |
| Formula           | C8H4Br4O3S2 |
| Charge            | 0           |
| Spin multiplicity | 1           |

### b- Computational details

|                                                         |              |             |
|---------------------------------------------------------|--------------|-------------|
| Software                                                | Gaussian     | (2009+D.01) |
| Computational method                                    | DFT          |             |
| Functional                                              | B3LYP        |             |
| Basis set name                                          | 6-311G(2d,p) |             |
| Number of basis set functions                           | 535          |             |
| Closed shell calculation                                | True         |             |
| Requested SCF convergence on RMS and Max density matrix | 1e-08        | 1e-06       |
| Requested SCF convergence on energy                     | 1e-06        |             |
| Job type: Geometry optimization                         |              |             |
| Max Force value and threshold                           | 0.000127     | 0.000450    |
| RMS Force value and threshold                           | 0.000016     | 0.000300    |
| Max Displacement value and threshold                    | 0.001595     | 0.001800    |
| RMS Displacement value and threshold                    | 0.000354     | 0.001200    |
| Job type: Frequency and thermochemical analysis         |              |             |
| Temperature                                             | 298.15 K     |             |
| Anharmonic effects                                      | None         |             |
| Anharmonic effects                                      | None         |             |

## c- Results

|                                                |                       |
|------------------------------------------------|-----------------------|
| Total molecular energy                         | -11625.92075 hartrees |
| HOMO number                                    | 124                   |
| LUMO+1 energies                                | -2.08 eV              |
| LUMO energies                                  | -2.79 eV              |
| HOMO energies                                  | -6.99 eV              |
| HOMO-1 energies                                | -7.72 eV              |
| Geometry optimization specific results         |                       |
| Converged nuclear repulsion energy             | 3907.02077 Hartrees   |
| Frequency and Thermochemistry specific results |                       |
| Enthalpy at 298.15 K                           | -11625.79284 Hartrees |
| Gibbs free energy at 298.15 K                  | -11625.85884 Hartrees |
| Entropy at 298.15 K                            | 0.00022 Hartrees      |

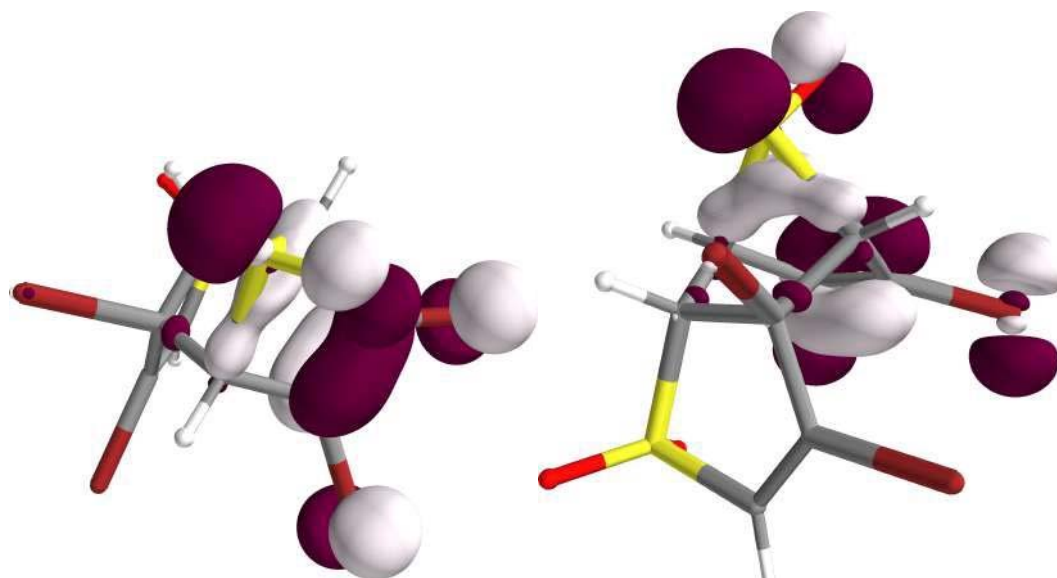

Figure 2: Representation of the HOMO from two points of view.

Table. Most intense (> 50 km/mol) molecular vibrations in wavenumbers

| Frequencies | Intensity | Symmetry |
|-------------|-----------|----------|
| 1637        | 50        | A        |
| 1338        | 130       | A        |
| 1256        | 80        | A        |
| 1160        | 111       | A        |
| 1147        | 189       | A        |
| 878         | 61        | A        |

Table. Converged cartesian atomic coordinates in Angstroms

| Atom | X       | Y       | Z       |
|------|---------|---------|---------|
| C    | -1.7443 | -0.3831 | 0.2962  |
| C    | -0.9620 | -1.5287 | 0.8800  |
| S    | -0.3646 | -0.7484 | 2.5403  |
| C    | 0.1974  | 0.5415  | 1.2229  |
| C    | -1.0938 | 0.7672  | 0.4832  |
| C    | 1.1484  | -0.3297 | 0.3680  |
| C    | 0.4187  | -1.7020 | 0.2261  |
| C    | 1.4592  | 0.1943  | -1.0083 |
| C    | 1.1575  | -0.5685 | -2.0471 |
| S    | 0.4367  | -2.1210 | -1.5729 |
| O    | -1.5141 | -0.2065 | 3.2916  |
| H    | 0.6567  | 1.4177  | 1.6655  |
| O    | 1.3903  | -3.1878 | -1.7879 |
| O    | -0.9075 | -2.2315 | -2.0963 |
| H    | 1.3093  | -0.3570 | -3.0945 |
| Br   | 2.2418  | 1.9113  | -1.1984 |
| Br   | 2.8927  | -0.5529 | 1.3488  |
| H    | 0.9796  | -2.5091 | 0.6895  |
| H    | -1.5106 | -2.4519 | 1.0338  |
| Br   | -3.4324 | -0.6217 | -0.4883 |
| Br   | -1.6399 | 2.4882  | -0.0495 |

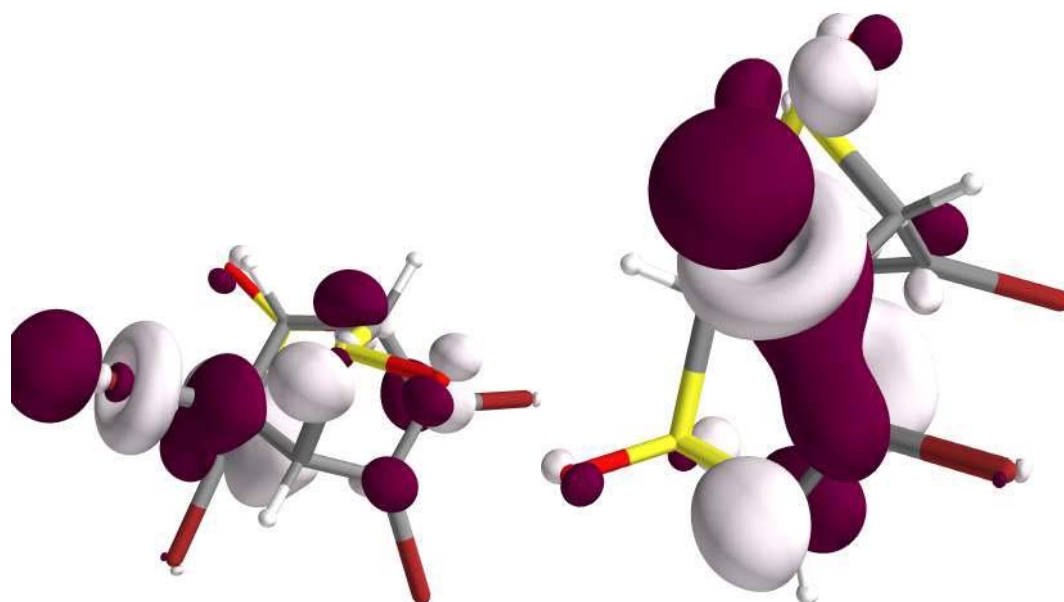

Figure 3: Representation of the LUMO from two points of view.

## 6- Cycloadduct 1-Cy

### a- Description

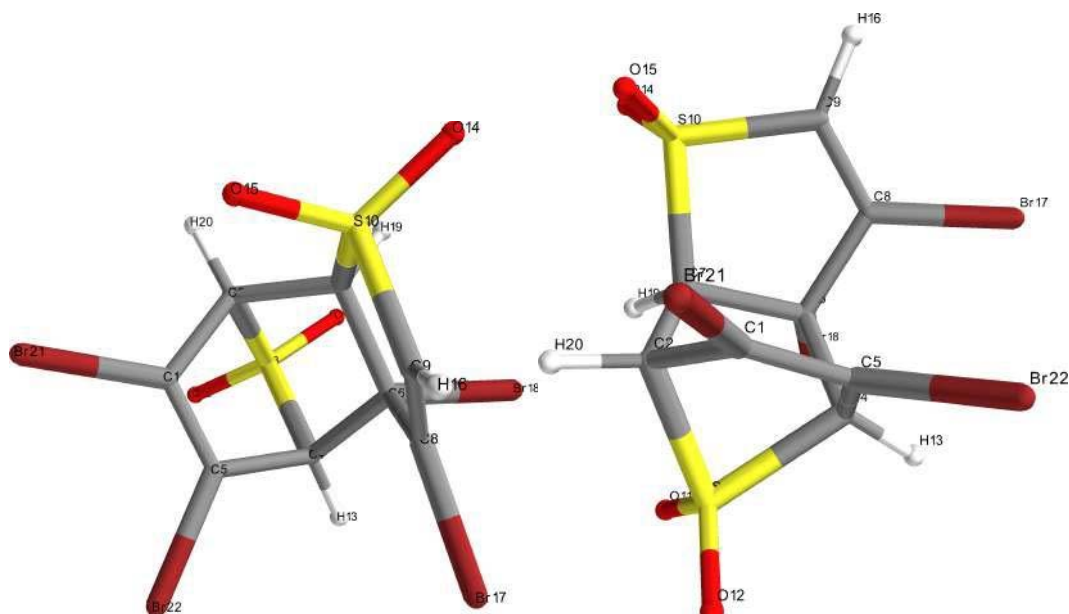

Figure 1: Chemical structure diagram with atomic numbering from two points of view.

|                   |             |
|-------------------|-------------|
| Directory name    | 1-Cy        |
| Formula           | C8H4Br4O4S2 |
| Charge            | 0           |
| Spin multiplicity | 1           |

### b- Computational details

|                                                         |              |             |
|---------------------------------------------------------|--------------|-------------|
| Software                                                | Gaussian     | (2009+D.01) |
| Computational method                                    | DFT          |             |
| Functional                                              | B3LYP        |             |
| Basis set name                                          | 6-311G(2d,p) |             |
| Number of basis set functions                           | 558          |             |
| Closed shell calculation                                | True         |             |
| Requested SCF convergence on RMS and Max density matrix | 1e-08        | 1e-06       |
| Requested SCF convergence on energy                     | 1e-06        |             |
| Job type: Geometry optimization                         |              |             |
| Max Force value and threshold                           | 0.000070     | 0.000450    |
| RMS Force value and threshold                           | 0.000011     | 0.000300    |
| Max Displacement value and threshold                    | 0.001046     | 0.001800    |
| RMS Displacement value and threshold                    | 0.000202     | 0.001200    |
| Job type: Frequency and thermochemical analysis         |              |             |
| Temperature                                             | 298.15 K     |             |
| Anharmonic effects                                      | None         |             |
| Anharmonic effects                                      | None         |             |



## c- Results

|                                                |                       |
|------------------------------------------------|-----------------------|
| Total molecular energy                         | -11701.15995 hartrees |
| HOMO number                                    | 128                   |
| LUMO+1 energies                                | -1.83 eV              |
| LUMO energies                                  | -2.68 eV              |
| HOMO energies                                  | -7.50 eV              |
| HOMO-1 energies                                | -8.22 eV              |
| Geometry optimization specific results         |                       |
| Converged nuclear repulsion energy             | 4192.70369 Hartrees   |
| Frequency and Thermochemistry specific results |                       |
| Enthalpy at 298.15 K                           | -11701.02631 Hartrees |
| Gibbs free energy at 298.15 K                  | -11701.09353 Hartrees |
| Entropy at 298.15 K                            | 0.00023 Hartrees      |

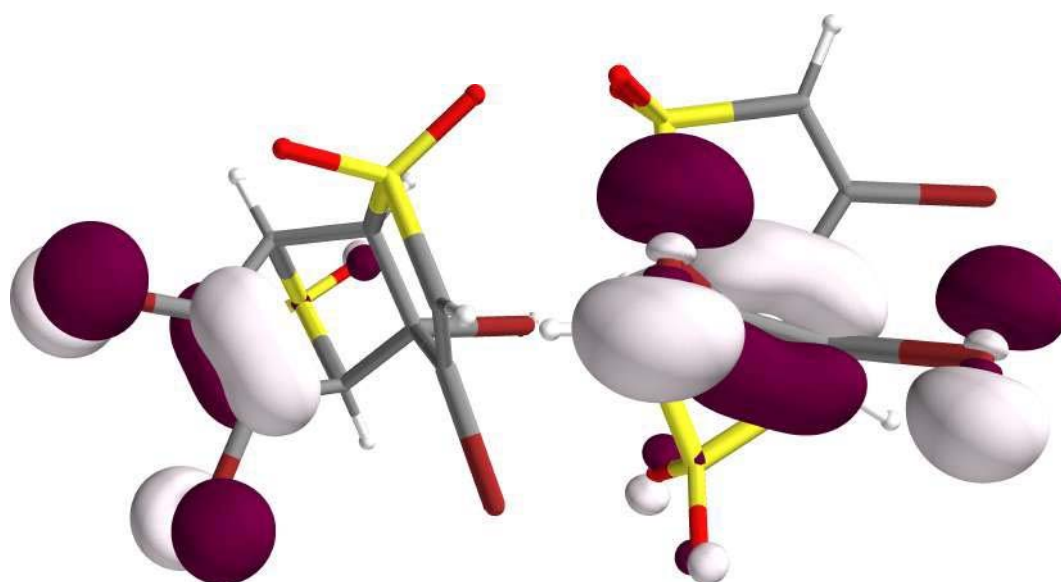

Figure 2: Representation of the HOMO from two points of view.

Table. Most intense (> 50 km/mol) molecular vibrations in wavenumbers

| Frequencies | Intensity | Symmetry |
|-------------|-----------|----------|
| 1639        | 52        | A        |
| 1350        | 139       | A        |
| 1337        | 125       | A        |
| 1253        | 90        | A        |
| 1175        | 182       | A        |
| 1145        | 179       | A        |
| 882         | 71        | A        |
| 539         | 55        | A        |

Table. Converged cartesian atomic coordinates in Angstroms

| Atom | X       | Y       | Z       |
|------|---------|---------|---------|
| C    | 1.6890  | -0.4547 | -0.0549 |
| C    | 0.8982  | -1.6654 | -0.4326 |
| S    | 0.4449  | -1.1460 | -2.2109 |
| C    | -0.1720 | 0.3803  | -1.2244 |
| C    | 1.1059  | 0.6684  | -0.5029 |
| C    | -1.1705 | -0.2834 | -0.2403 |
| C    | -0.5268 | -1.6556 | 0.1459  |
| C    | -1.3995 | 0.4967  | 1.0330  |
| C    | -1.1749 | -0.1090 | 2.1879  |
| S    | -0.6069 | -1.7770 | 1.9853  |
| O    | -0.6098 | -1.9793 | -2.7399 |
| O    | 1.5862  | -0.8097 | -3.0261 |
| H    | -0.5799 | 1.1773  | -1.8340 |
| O    | -1.6567 | -2.7040 | 2.3445  |
| O    | 0.7201  | -1.9271 | 2.5441  |
| H    | -1.3090 | 0.2857  | 3.1833  |
| Br   | -2.0045 | 2.2911  | 0.9313  |
| Br   | -2.9607 | -0.5133 | -1.1007 |
| H    | -1.1062 | -2.4956 | -0.2257 |
| H    | 1.4119  | -2.6186 | -0.3727 |
| Br   | 3.3865  | -0.6008 | 0.7315  |
| Br   | 1.8176  | 2.4091  | -0.4361 |

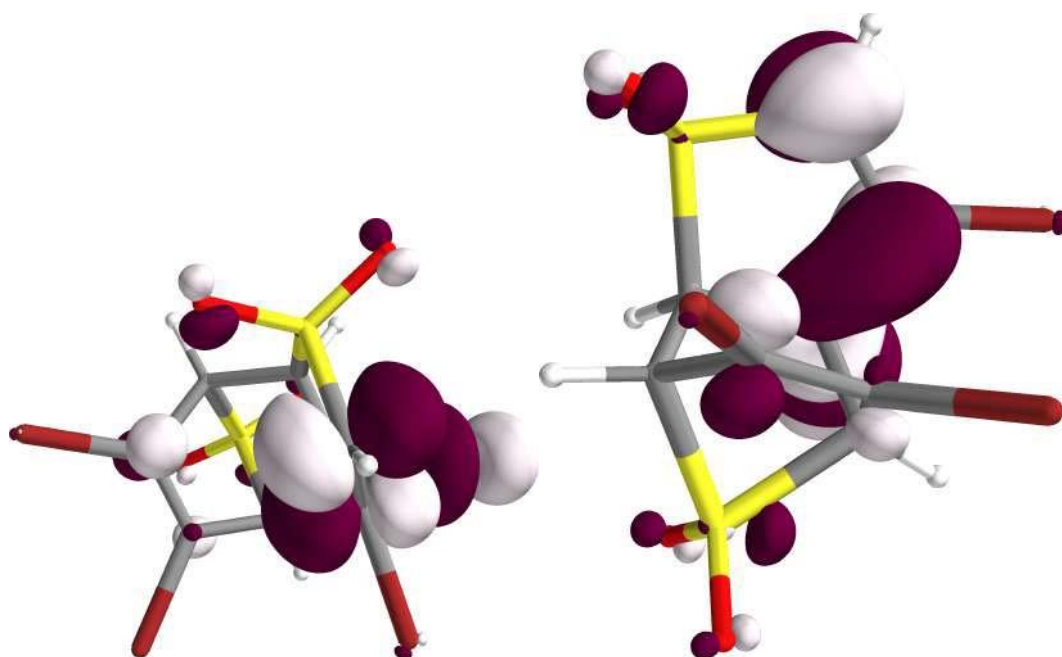

Figure 3: Representation of the LUMO from two points of view.

## 7- 2-bromothiophene

### a. Description

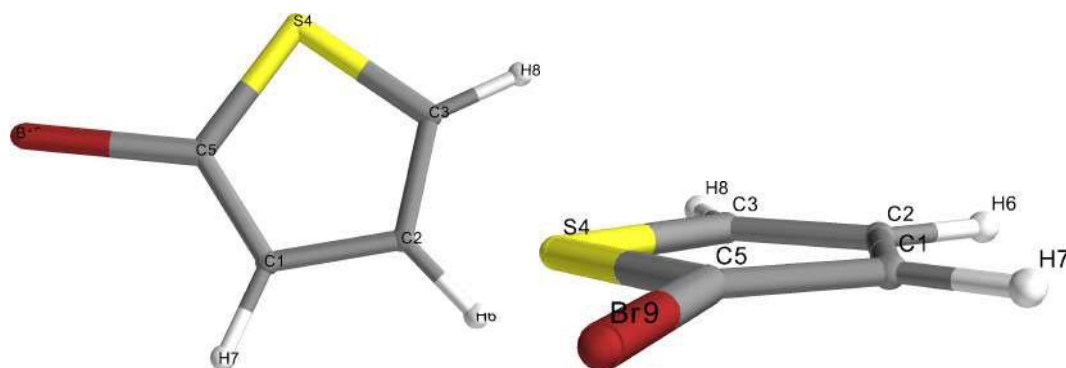

Figure 1: Chemical structure diagram with atomic numbering from two points of view.

|                   |                                 |
|-------------------|---------------------------------|
| Directory name    | 2                               |
| Formula           | C4H3BrS                         |
| Charge            | 0                               |
| Spin multiplicity | 1                               |
| Monoisotopic mass | 161.91388 Da                    |
| InChI             | 1S/C4H3BrS/c5-4-2-1-3-6-4/h1-3H |
| SMILES            | c1ccsc1Br                       |

### b. Computational details

|                                                         |              |               |
|---------------------------------------------------------|--------------|---------------|
| Software                                                | Gaussian     | (2009+D.01)   |
| Computational method                                    | DFT          |               |
| Functional                                              | B3LYP        |               |
| Basis set name                                          | 6-311G(2d,p) |               |
| Number of basis set functions                           | 190          |               |
| Closed shell calculation                                | True         |               |
| Requested SCF convergence on RMS and Max density matrix | 1e-08        | 1e-06         |
| Requested SCF convergence on energy                     | 1e-06        |               |
| Job type: Geometry optimization                         |              |               |
| Max Force value and threshold                           | 0.000375     | 0.000450      |
| RMS Force value and threshold                           | 0.000143     | 0.000300      |
| Max Displacement value and threshold                    | 0.001759     | 0.001800      |
| RMS Displacement value and threshold                    | 0.000573     | 0.001200      |
| Job type: Frequency and thermochemical analysis         |              |               |
| Temperature                                             | 298.15 K     |               |
| Anharmonic effects                                      | None         |               |
| Anharmonic effects                                      | None         |               |
| Job type: Time-dependent calculation                    |              |               |
| Number of calculated excited states and spin state      | 15           | ['Singlet-A'] |

## c. Results

|                                                           |                      |                 |
|-----------------------------------------------------------|----------------------|-----------------|
| Total molecular energy                                    | -3126.61034 hartrees |                 |
| HOMO number                                               | 39                   |                 |
| LUMO+1 energies                                           | -0.48 eV             |                 |
| LUMO energies                                             | -0.84 eV             |                 |
| HOMO energies                                             | -6.50 eV             |                 |
| HOMO-1 energies                                           | -7.27 eV             |                 |
| CDFT indices: Electron Affinity                           | -0.0016 hartrees     |                 |
| CDFT indices: Ionisation Potential                        | 0.0116 hartrees      |                 |
| CDFT indices: Electronegativity                           | 0.0050 hartrees      |                 |
| CDFT indices: Hardness                                    | 0.0131 hartrees      |                 |
| CDFT indices: Electrophilicity                            | 0.0010               |                 |
| CDFT indices: Electron-flow                               | 0.3815 e-            |                 |
| Geometry optimization specific results                    |                      |                 |
| Converged nuclear repulsion energy                        | 448.65937 Hartrees   |                 |
| Frequency and Thermochemistry specific results            |                      |                 |
| Enthalpy at 298.15 K                                      | -3126.54734 Hartrees |                 |
| Gibbs free energy at 298.15 K                             | -3126.58449 Hartrees |                 |
| Entropy at 298.15 K                                       | 0.00012 Hartrees     |                 |
| Mean Mulliken atomic charge and standard deviation        | 0.0000 e-            | 0.0825 e-       |
| Atoms with negatives charges under the standard deviation | N $\hat{A}^\circ$    | Mulliken charge |
|                                                           | C 1                  | -0.105          |
|                                                           | C 2                  | -0.092          |
|                                                           | C 3                  | -0.087          |
| Atoms with positives charges over the standard deviation  | N $\hat{A}^\circ$    | Mulliken charge |
|                                                           | S 4                  | +0.114          |

Table. Selection of the most important condensed Fukui functions based on Mulliken charges.

| Atom | atomic dual descriptor (f+ - f-) | atomic electrophilicity f+ | atomic nucleophilicity f- |
|------|----------------------------------|----------------------------|---------------------------|
| Br 9 | -0.11                            | 0.22                       | 0.32                      |
| S 4  | 0.11                             | 0.28                       | 0.17                      |

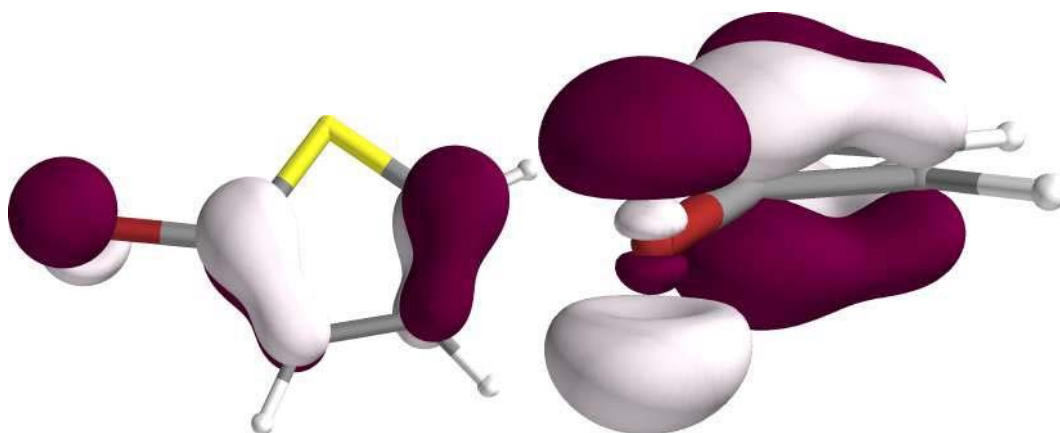

Figure 2: Representation of the HOMO from two points of view.

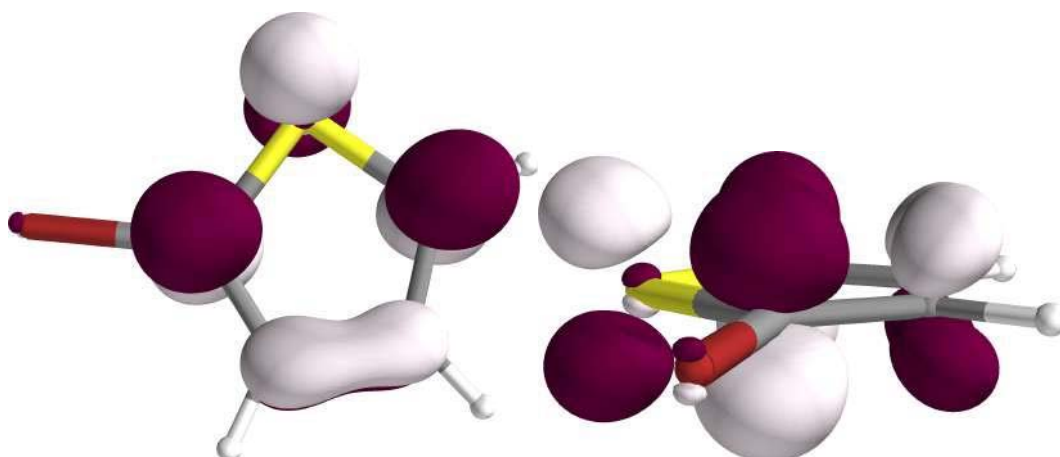

Figure 3: Representation of the LUMO from two points of view.

Table. Most intense (> 50 km/mol) molecular vibrations in wavenumbers

| Frequencies | Intensity | Symmetry |
|-------------|-----------|----------|
| 694         | 70        | A        |

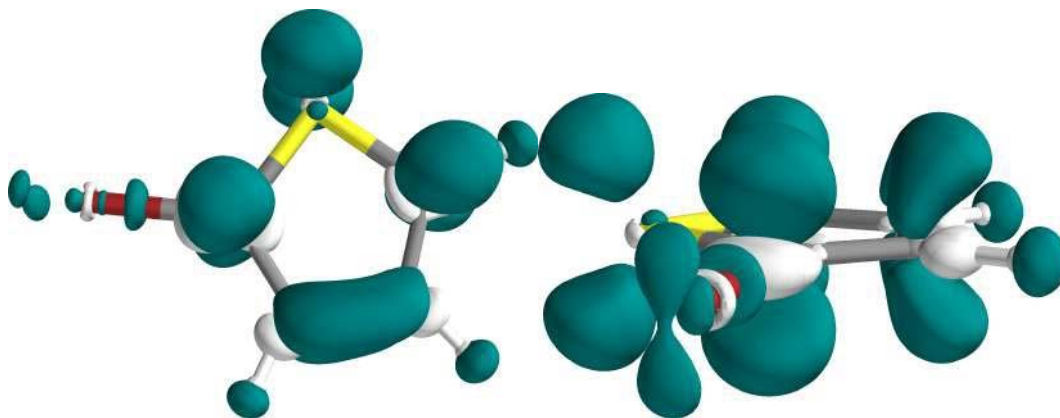

Figure 4: Representation of the F+ function from two points of view. The Blue color indicate the most electrophilic regions.

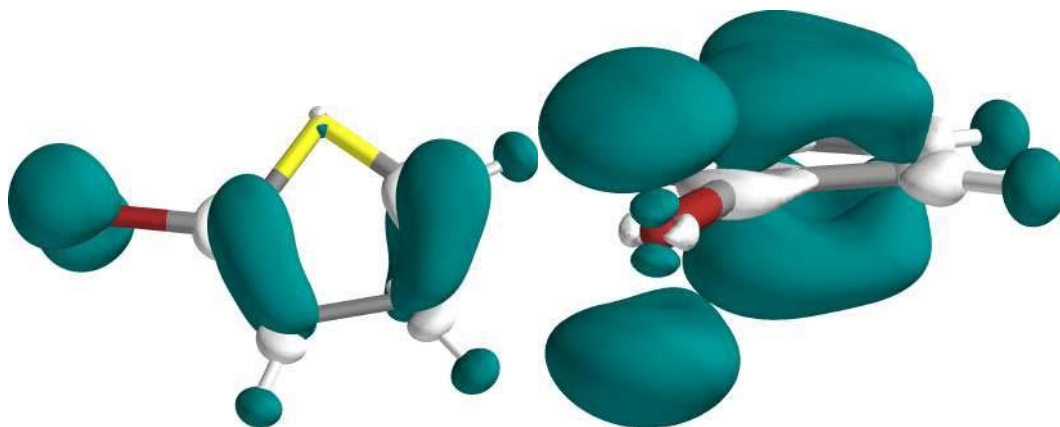

Figure 5: Representation of the F- function from two points of view. The Blue color indicate the most nucleophilic regions.

Table. Results concerning the calculated mono-electronic excitations.

| E.S. | Symmetry  | nm  | cm <sup>-1</sup> | <i>f</i> | R    | Λ    | <i>d<sub>CT</sub></i> | <i>q<sub>C</sub></i> | Excitation description : initial<br><i>τ</i> OM - end-ing OM (% if > 5%) |
|------|-----------|-----|------------------|----------|------|------|-----------------------|----------------------|--------------------------------------------------------------------------|
| 1    | Singlet-A | 253 | 39517            | 0.000    | 0.0  | 0.53 | 214.47                | 0.70                 | 39-41(99);                                                               |
| 2    | Singlet-A | 234 | 42556            | 0.145    | -0.0 | 0.77 | 141.77                | 0.40                 | 39-40(96);                                                               |
| 3    | Singlet-A | 223 | 44698            | 0.000    | 0.0  | 0.43 | 173.50                | 0.76                 | 39-42(97);                                                               |
| 4    | Singlet-A | 216 | 46176            | 0.000    | 0.0  | 0.30 | 237.84                | 0.85                 | 38-41(95);                                                               |
| 5    | Singlet-A | 213 | 46823            | 0.067    | -0.0 | 0.69 | 45.30                 | 0.39                 | 38-40(81); 39-43(16);                                                    |
| 6    | Singlet-A | 201 | 49671            | 0.000    | -0.0 | 0.43 | 120.10                | 0.77                 | 38-42(96);                                                               |
| 7    | Singlet-A | 194 | 51352            | 0.000    | 0.0  | 0.27 | 298.49                | 0.89                 | 37-40(98);                                                               |
| 8    | Singlet-A | 190 | 52606            | 0.005    | 0.0  | 0.58 | 98.89                 | 0.66                 | 37-41(97);                                                               |
| 9    | Singlet-A | 178 | 56136            | 0.001    | -0.0 | 0.34 | 159.12                | 0.80                 | 39-44(97);                                                               |
| 10   | Singlet-A | 173 | 57504            | 0.000    | 0.0  | 0.57 | 40.26                 | 0.66                 | 36-41(95);                                                               |
| 11   | Singlet-A | 173 | 57651            | 0.033    | -0.0 | 0.61 | 263.64                | 0.54                 | 36-40(74); 39-43(15);                                                    |
| 12   | Singlet-A | 168 | 59369            | 0.182    | 0.0  | 0.67 | 239.83                | 0.40                 | 36-40(17); 38-40(8); 39-43(56);                                          |
| 13   | Singlet-A | 166 | 60089            | 0.005    | -0.0 | 0.40 | 223.28                | 0.75                 | 39-45(94);                                                               |
| 14   | Singlet-A | 165 | 60525            | 0.010    | 0.0  | 0.36 | 322.90                | 0.78                 | 37-42(88);                                                               |
| 15   | Singlet-A | 161 | 62011            | 0.002    | 0.0  | 0.47 | 147.15                | 0.55                 | 35-40(45); 38-44(51);                                                    |

Table. Converged cartesian atomic coordinates in Angstroms

| Atom | X       | Y       | Z       |
|------|---------|---------|---------|
| C    | -0.8587 | 1.3596  | 0.0000  |
| C    | -2.2631 | 1.1220  | 0.0000  |
| C    | -2.5811 | -0.2015 | 0.0000  |
| S    | -1.1673 | -1.1995 | 0.0000  |
| C    | -0.1458 | 0.2011  | 0.0000  |
| H    | -3.0025 | 1.9111  | -0.0000 |
| H    | -0.4014 | 2.3384  | 0.0000  |
| H    | -3.5584 | -0.6567 | 0.0000  |
| Br   | 1.7352  | 0.0203  | 0.0000  |

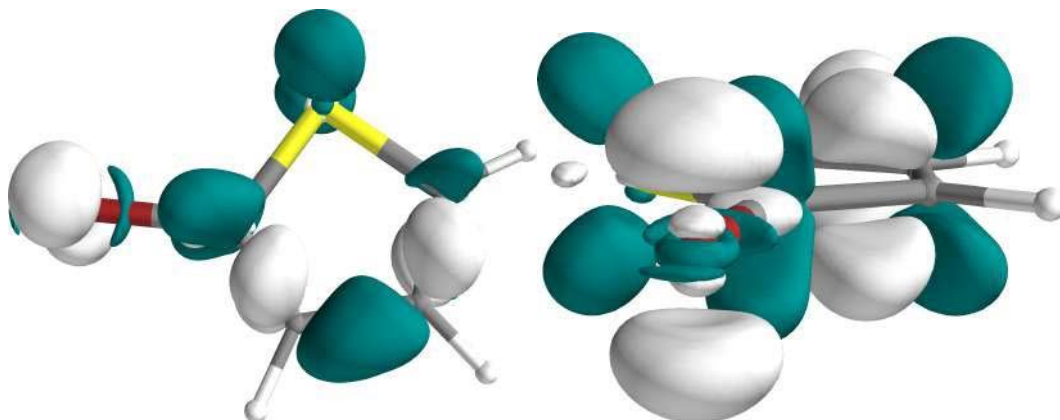

Figure 6: Representation of the Dual descriptor from two points of view. Electrophilic and nucleophilic regions correspond to blue and white surfaces.

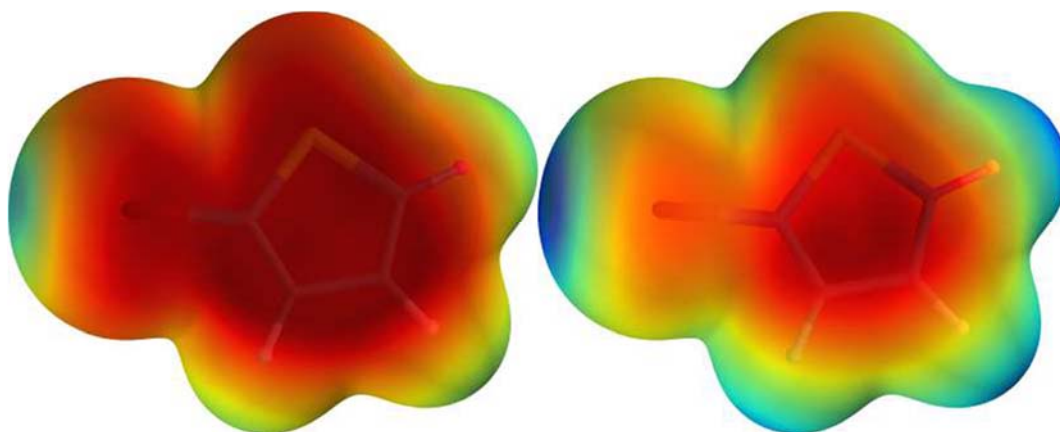

Figure 7: Representations of the Molecular Electrostatic Potential mapped on the electron density (cutoff value of

$0.002 e^-/\text{bohr}^3$ ). On the left, red, blue and green regions correspond to negative values  $< -0.06$  a.u., positive values  $>$

$0.08$  a.u. and neutral values respectively. On the right, the scale is set automatically to highlight the minimum values in red and the maximum values in blues.

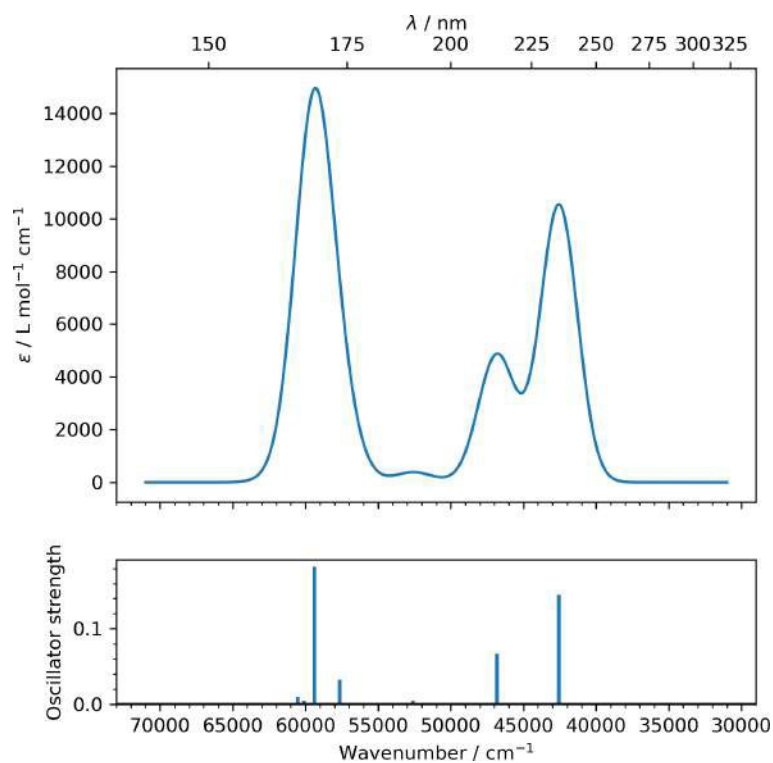

Figure 8: Calculated UV visible Absorption spectrum with a gaussian broadening (FWHM = 3000  $\text{cm}^{-1}$ )

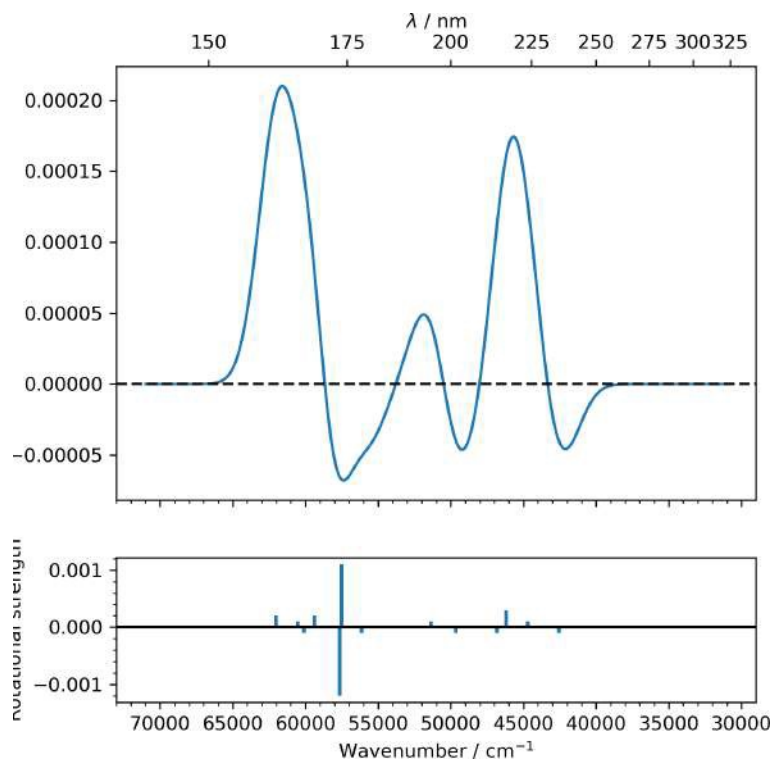

Figure 9: Calculated Circular Dichroism spectrum with a gaussian broadening (FWHM = 3000  $\text{cm}^{-1}$ )



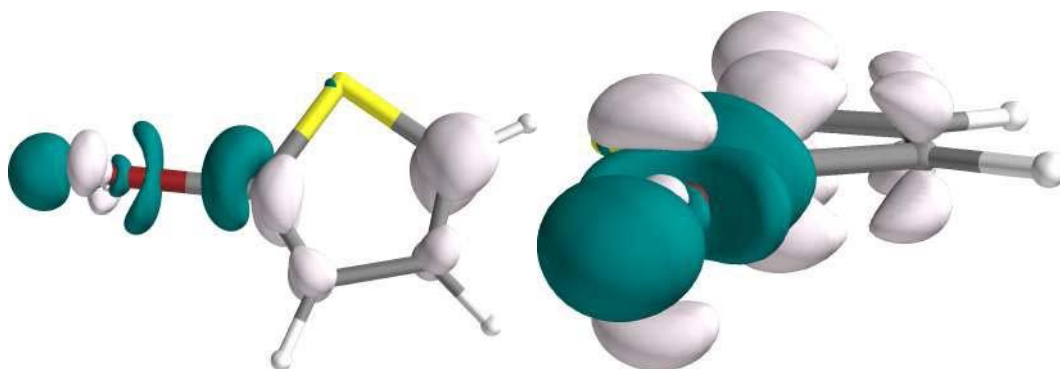

Figure 10: Representation of the Electron Density Difference (S1-S0) from two points of view.

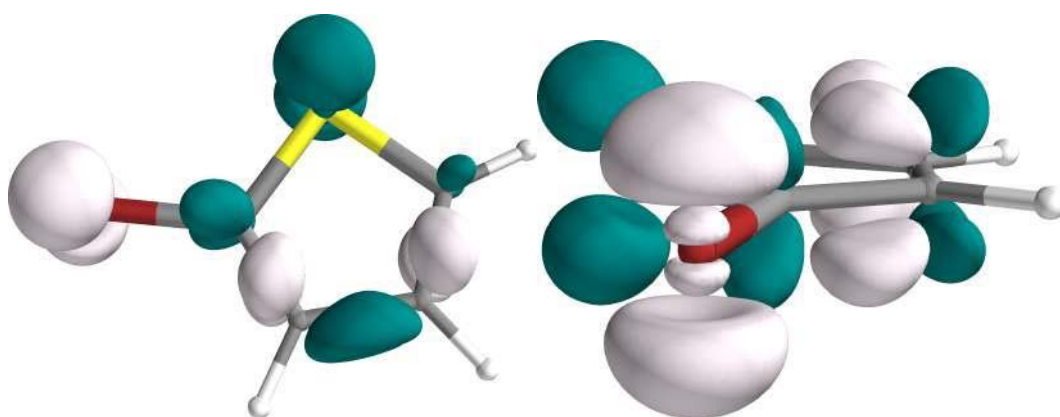

Figure 11: Representation of the Electron Density Difference (S2-S0) from two points of view.

## 8- 2-bromothiophene sulfoxide 2-SO

### a. Description

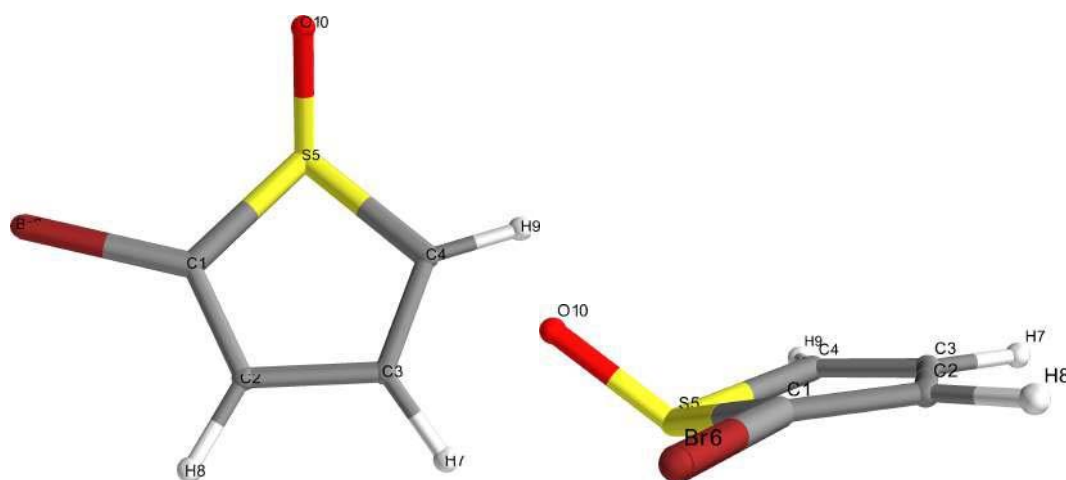

Figure 1: Chemical structure diagram with atomic numbering from two points of view.

|                   |                                              |
|-------------------|----------------------------------------------|
| Directory name    | 2-SO                                         |
| Formula           | C4H3BrOS                                     |
| Charge            | 0                                            |
| Spin multiplicity | 1                                            |
| Monoisotopic mass | 177.90880 Da                                 |
| InChI             | 1S/C4H3BrOS/c5-4-2-1-3-7(4)6/h1-3H/t7-/m0/s1 |
| SMILES            | c1(cccs1=O)Br                                |

### b. Computational details

|                                                         |              |               |
|---------------------------------------------------------|--------------|---------------|
| Software                                                | Gaussian     | (2009+D.01)   |
| Computational method                                    | DFT          |               |
| Functional                                              | B3LYP        |               |
| Basis set name                                          | 6-311G(2d,p) |               |
| Number of basis set functions                           | 213          |               |
| Closed shell calculation                                | True         |               |
| Requested SCF convergence on RMS and Max density matrix | 1e-08        | 1e-06         |
| Requested SCF convergence on energy                     | 1e-06        |               |
| Job type: Geometry optimization                         |              |               |
| Max Force value and threshold                           | 0.000149     | 0.000450      |
| RMS Force value and threshold                           | 0.000039     | 0.000300      |
| Max Displacement value and threshold                    | 0.000625     | 0.001800      |
| RMS Displacement value and threshold                    | 0.000262     | 0.001200      |
| Job type: Frequency and thermochemical analysis         |              |               |
| Temperature                                             | 298.15 K     |               |
| Anharmonic effects                                      | None         |               |
| Anharmonic effects                                      | None         |               |
| Job type: Time-dependent calculation                    |              |               |
| Number of calculated excited states and spin state      | 15           | ['Singlet-A'] |

## c. Results

|                                                           |                      |                 |
|-----------------------------------------------------------|----------------------|-----------------|
| Total molecular energy                                    | -3201.78226 hartrees |                 |
| HOMO number                                               | 43                   |                 |
| LUMO+1 energies                                           | -0.69 eV             |                 |
| LUMO energies                                             | -2.38 eV             |                 |
| HOMO energies                                             | -6.75 eV             |                 |
| HOMO-1 energies                                           | -6.96 eV             |                 |
|                                                           |                      |                 |
| CDFT indices: Electron Affinity                           | 0.0005 hartrees      |                 |
| CDFT indices: Ionisation Potential                        | 0.0120 hartrees      |                 |
| CDFT indices: Electronegativity                           | 0.0063 hartrees      |                 |
| CDFT indices: Hardness                                    | 0.0115 hartrees      |                 |
| CDFT indices: Electrophilicity                            | 0.0017               |                 |
| CDFT indices: Electron-flow                               | 0.5447 e-            |                 |
|                                                           |                      |                 |
| Geometry optimization specific results                    |                      |                 |
| Converged nuclear repulsion energy                        | 564.64445 Hartrees   |                 |
|                                                           |                      |                 |
| Frequency and Thermochemistry specific results            |                      |                 |
| Enthalpy at 298.15 K                                      | -3201.71508 Hartrees |                 |
| Gibbs free energy at 298.15 K                             | -3201.75537 Hartrees |                 |
| Entropy at 298.15 K                                       | 0.00014 Hartrees     |                 |
|                                                           |                      |                 |
| Mean Mulliken atomic charge and standard deviation        | -0.0000 e-           | 0.2923 e-       |
| Atoms with negatives charges under the standard deviation | N 10                 | Mulliken charge |
|                                                           | O 10                 | -0.625          |
| Atoms with positives charges over the standard deviation  | N 10                 | Mulliken charge |
|                                                           | S 5                  | +0.642          |

Table. Selection of the most important condensed Fukui functions based on Mulliken charges.

| Atom | atomic dual descriptor ( $f^+ - f^-$ ) | atomic electrophilicity $f^+$ | atomic nucleophilicity $f^-$ |
|------|----------------------------------------|-------------------------------|------------------------------|
| O 10 | -0.12                                  | 0.08                          | 0.20                         |
| Br 6 | -0.06                                  | 0.21                          | 0.27                         |

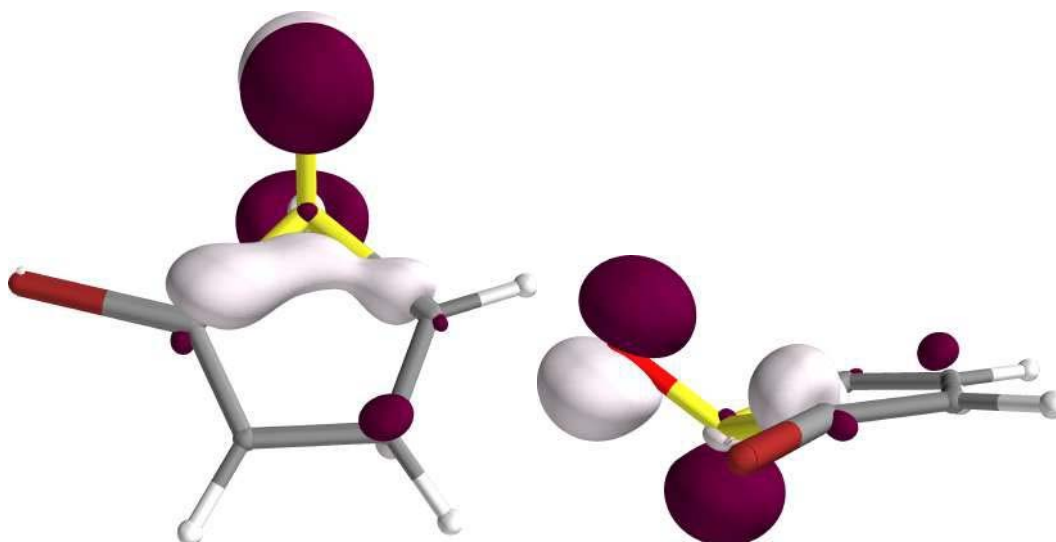

Figure 2: Representation of the HOMO from two points of view.

Table. Most intense (> 50 km/mol) molecular vibrations in wavenumbers

| Frequencies | Intensity | Symmetry |
|-------------|-----------|----------|
| 1114        | 52        | A        |
| 1095        | 86        | A        |
| 702         | 60        | A        |

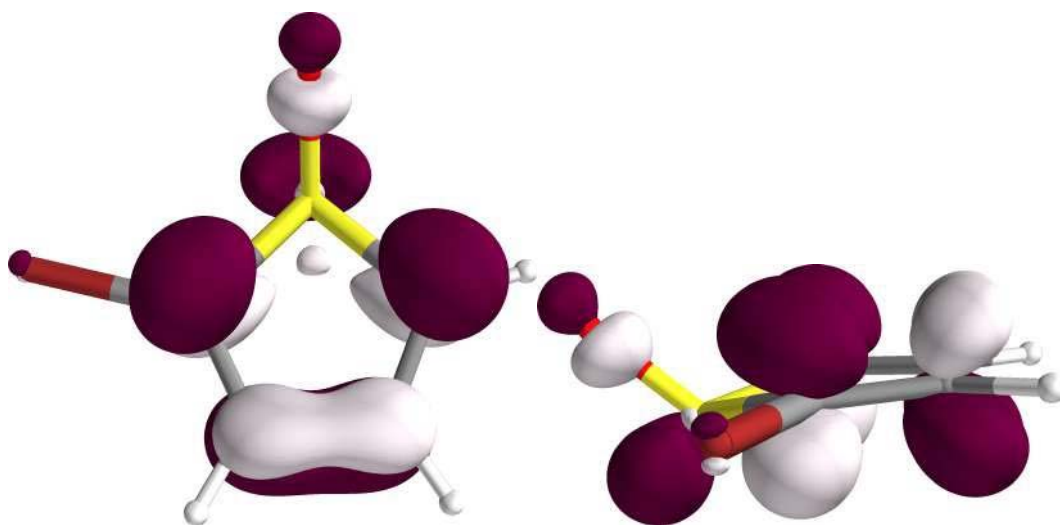

Figure 3: Representation of the LUMO from two points of view.

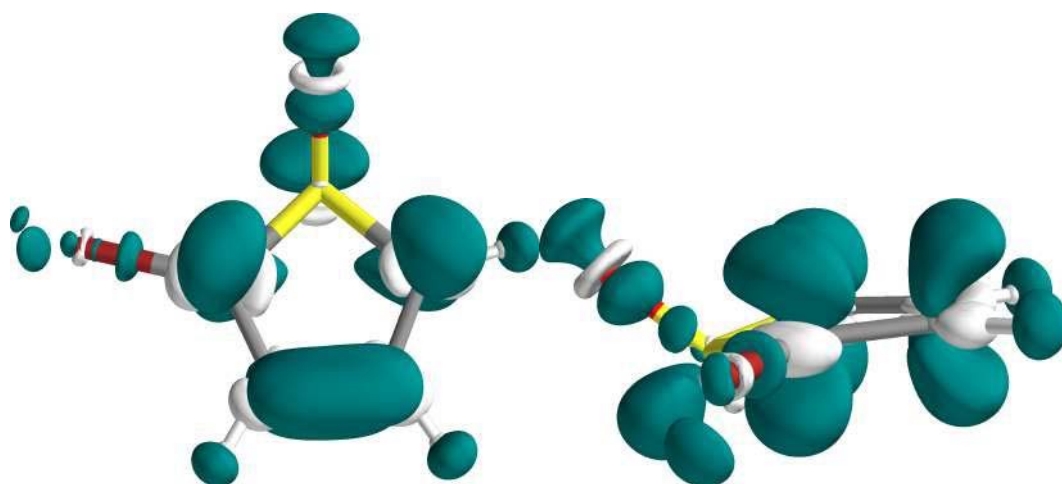

Figure 4: Representation of the F+ function from two points of view. The Blue color indicate the most electrophilic regions.

Table. Results concerning the calculated mono-electronic excitations.

| E.S. | Symmetry  | nm  | cm <sup>-1</sup> | <i>f</i> | R     | Λ    | d <sub>CR</sub> | q <sub>C</sub><br><i>r</i> | Excitation description : initial<br>OM - end-ing OM (% if > 5%) |
|------|-----------|-----|------------------|----------|-------|------|-----------------|----------------------------|-----------------------------------------------------------------|
| 1    | Singlet-A | 372 | 26813            | 0.011    | 7.0   | 0.55 | 212.13          | 0.68                       | 43-44(96);                                                      |
| 2    | Singlet-A | 323 | 30872            | 0.039    | -14.2 | 0.72 | 117.23          | 0.47                       | 41-44(6); 42-44(89);                                            |
| 3    | Singlet-A | 269 | 37132            | 0.030    | 13.6  | 0.49 | 195.64          | 0.71                       | 41-44(89);                                                      |
| 4    | Singlet-A | 243 | 41072            | 0.014    | 11.4  | 0.41 | 275.67          | 0.76                       | 42-45(14); 43-45(82);                                           |
| 5    | Singlet-A | 239 | 41777            | 0.001    | 3.9   | 0.51 | 221.17          | 0.69                       | 42-45(83); 43-45(14);                                           |
| 6    | Singlet-A | 233 | 42806            | 0.003    | -10.9 | 0.37 | 271.77          | 0.82                       | 40-44(95);                                                      |
| 7    | Singlet-A | 218 | 45858            | 0.038    | 5.1   | 0.54 | 190.18          | 0.56                       | 39-44(8); 43-46(77);                                            |
| 8    | Singlet-A | 212 | 46980            | 0.004    | -2.4  | 0.66 | 137.66          | 0.44                       | 39-44(35); 42-46(47); 43-46(11);                                |
| 9    | Singlet-A | 199 | 50095            | 0.028    | 0.7   | 0.63 | 139.50          | 0.40                       | 38-44(8); 39-44(43); 42-46(33);                                 |
| 10   | Singlet-A | 194 | 51381            | 0.033    | 5.7   | 0.51 | 213.99          | 0.62                       | 41-45(82);                                                      |
| 11   | Singlet-A | 183 | 54540            | 0.032    | 10.7  | 0.63 | 200.83          | 0.43                       | 38-44(66); 41-46(11); 42-48(7);                                 |
| 12   | Singlet-A | 181 | 54948            | 0.005    | -0.2  | 0.55 | 82.45           | 0.65                       | 40-45(86);                                                      |
| 13   | Singlet-A | 179 | 55615            | 0.017    | -16.2 | 0.41 | 340.38          | 0.65                       | 41-46(15); 43-47(60); 43-48(7);<br>43-49(6);                    |
| 14   | Singlet-A | 177 | 56265            | 0.001    | -12.7 | 0.50 | 148.15          | 0.61                       | 41-46(9); 43-48(82);                                            |
| 15   | Singlet-A | 175 | 57118            | 0.014    | -12.9 | 0.50 | 195.46          | 0.51                       | 41-46(42); 42-48(10); 43-49(28);                                |

Table. Converged cartesian atomic coordinates in Angstroms

| Atom | X       | Y       | Z       |
|------|---------|---------|---------|
| C    | 0.0266  | 0.4433  | 0.0296  |
| C    | -0.5456 | 1.6487  | 0.1316  |
| C    | -2.0042 | 1.5830  | 0.1138  |
| C    | -2.5006 | 0.3448  | -0.0019 |
| S    | -1.2032 | -0.8390 | -0.3690 |
| Br   | 1.8538  | 0.0144  | -0.0047 |
| H    | -2.6141 | 2.4763  | 0.1738  |
| H    | 0.0008  | 2.5795  | 0.2065  |
| H    | -3.5300 | 0.0280  | -0.0637 |
| O    | -1.1684 | -2.0351 | 0.5141  |

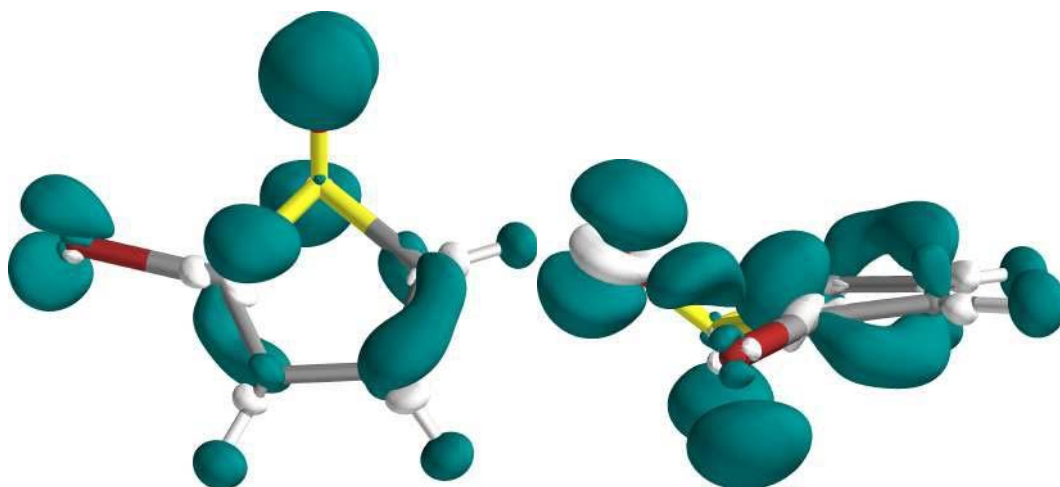

Figure 5: Representation of the F- function from two points of view. The Blue color indicate the most nucleophilic regions.

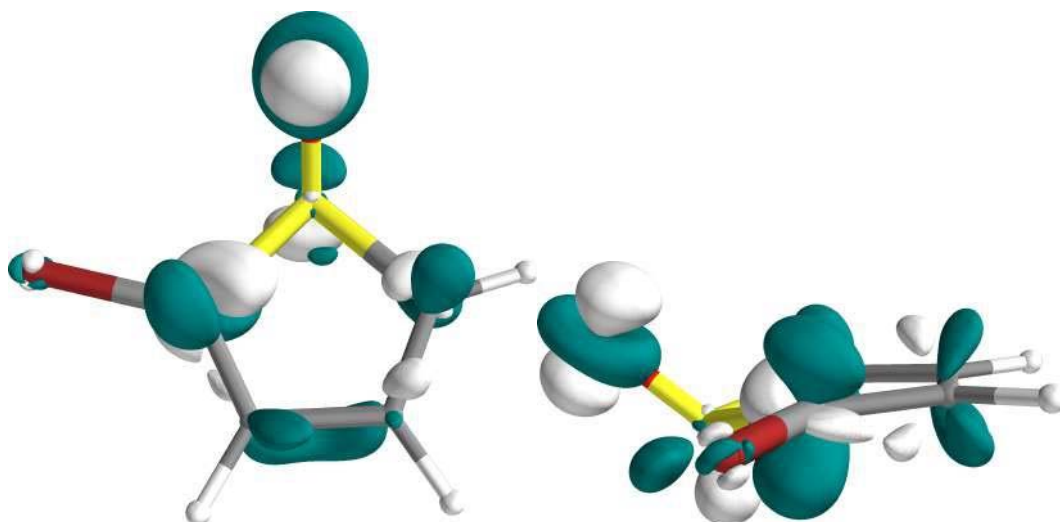

Figure 6: Representation of the Dual descriptor from two points of view. Electrophilic and nucleophilic regions correspond to blue and white surfaces.

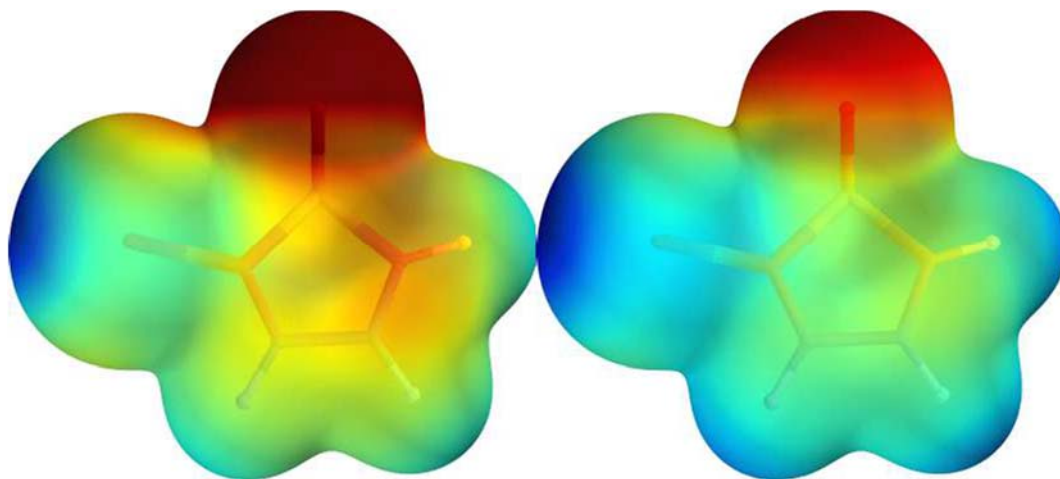

Figure 7: Representations of the Molecular Electrostatic Potential mapped on the electron density (cutoff value of

$0.002 \text{ e}^-/\text{bohr}^3$ ). On the left, red, blue and green regions correspond to negative values  $< -0.06 \text{ a.u.}$ , positive values  $>$

$0.08 \text{ a.u.}$  and neutral values respectively. On the right, the scale is set automatically to highlight the minimum values in red and the maximum values in blues.

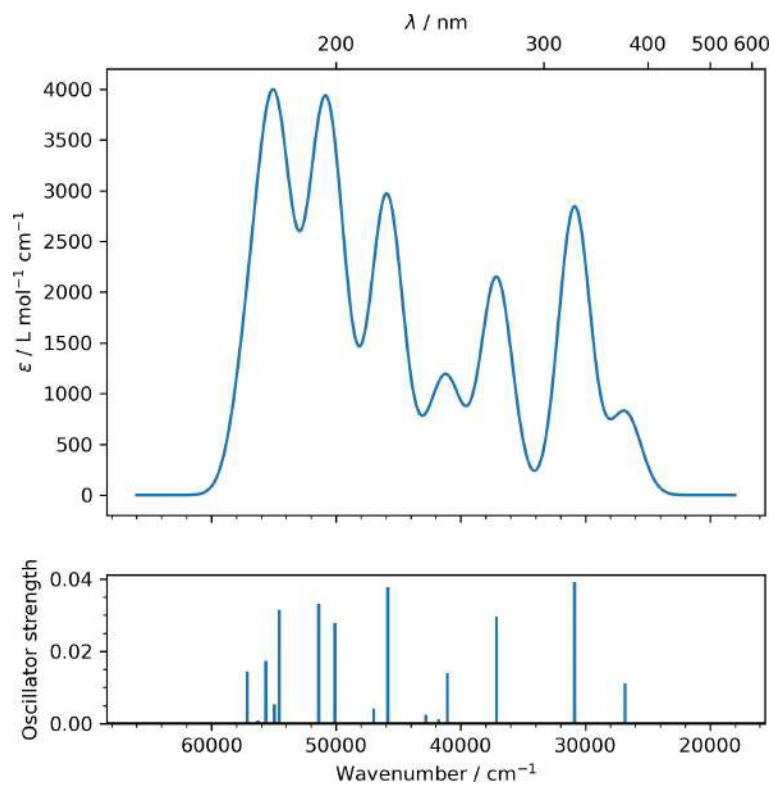

Figure 8: Calculated UV visible Absorption spectrum with a gaussian broadening (FWHM = 3000 cm-1)

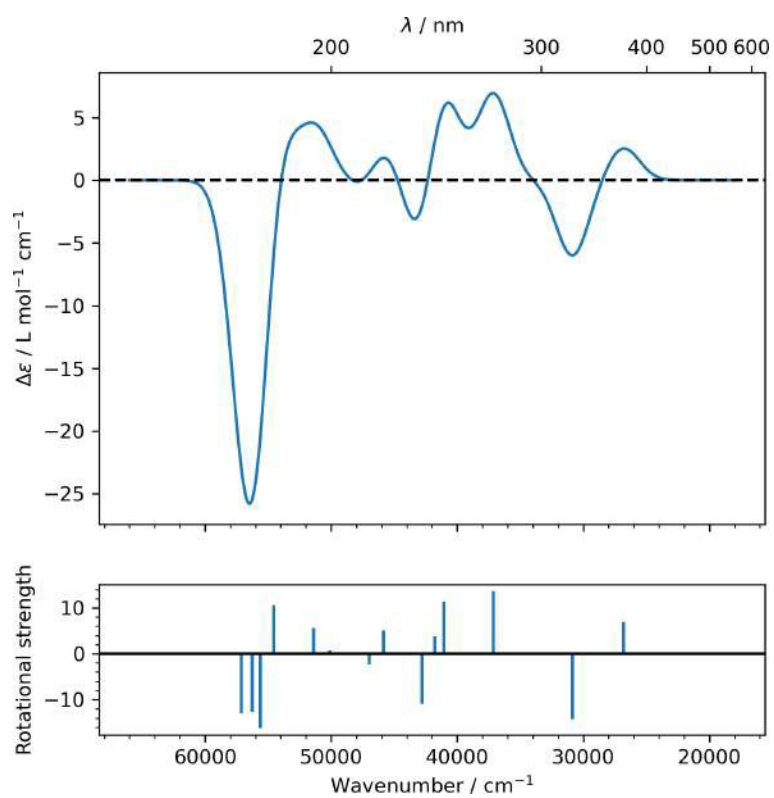

Figure 9: Calculated Circular Dichroism spectrum with a gaussian broadening (FWHM = 3000 cm-1)



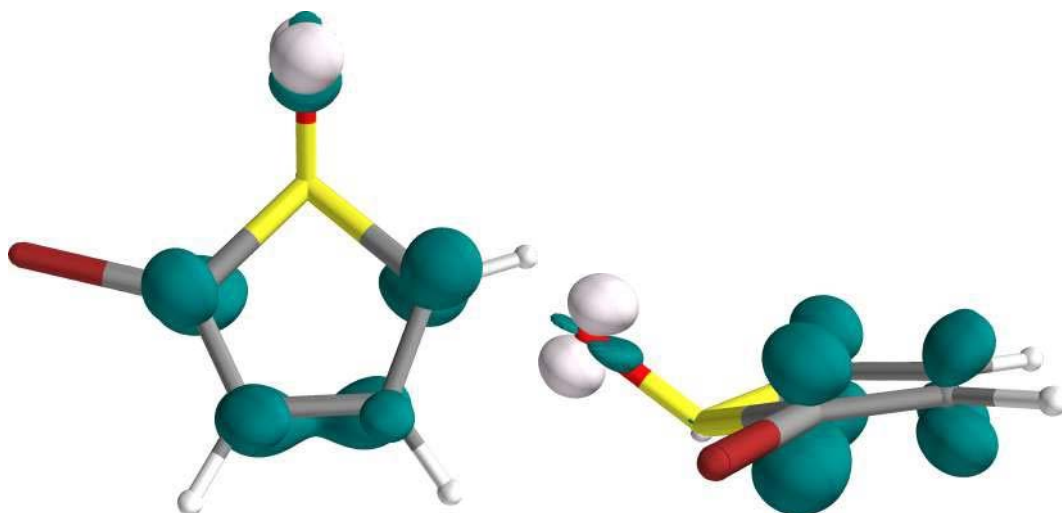

Figure 10: Representation of the Electron Density Difference (S1-S0) from two points of view.

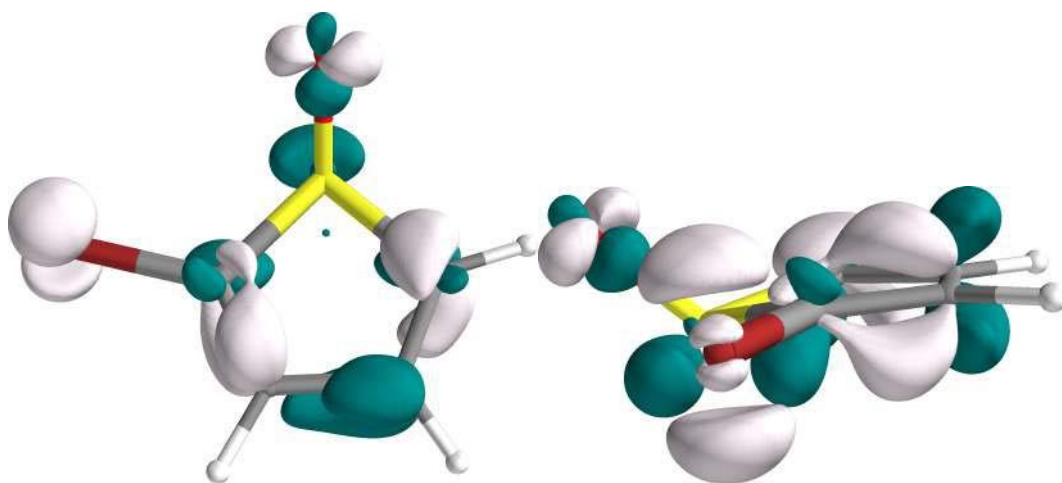

Figure 11: Representation of the Electron Density Difference (S2-S0) from two points of view.

## 9- 2-bromothiophene sulfone 2-SO2

### a. Description

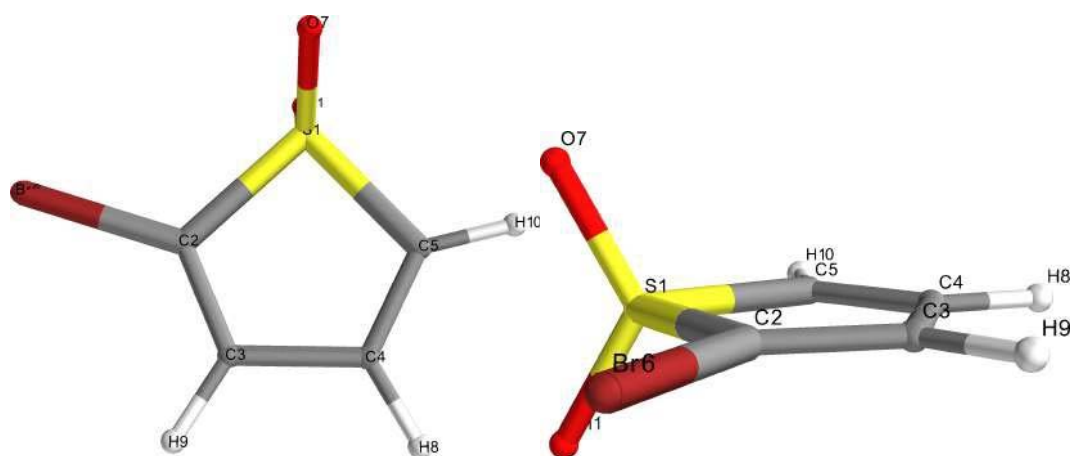

Figure 1: Chemical structure diagram with atomic numbering from two points of view.

|                   |                                       |
|-------------------|---------------------------------------|
| Directory name    | 2-SO2                                 |
| Formula           | C4H3BrO2S                             |
| Charge            | 0                                     |
| Spin multiplicity | 1                                     |
| Monoisotopic mass | 193.90371 Da                          |
| InChI             | 1S/C4H3BrO2S/c5-4-2-1-3-8(4,6)7/h1-3H |
| SMILES            | S1(=O)(=O)C(=CC=C1)Br                 |

### b. Computational details

|                                                         |              |               |
|---------------------------------------------------------|--------------|---------------|
| Software                                                | Gaussian     | (2009+D.01)   |
| Computational method                                    | DFT          |               |
| Functional                                              | B3LYP        |               |
| Basis set name                                          | 6-311G(2d,p) |               |
| Number of basis set functions                           | 236          |               |
| Closed shell calculation                                | True         |               |
| Requested SCF convergence on RMS and Max density matrix | 1e-08        | 1e-06         |
| Requested SCF convergence on energy                     | 1e-06        |               |
| Job type: Geometry optimization                         |              |               |
| Max Force value and threshold                           | 0.000200     | 0.000450      |
| RMS Force value and threshold                           | 0.000037     | 0.000300      |
| Max Displacement value and threshold                    | 0.001677     | 0.001800      |
| RMS Displacement value and threshold                    | 0.000427     | 0.001200      |
| Job type: Frequency and thermochemical analysis         |              |               |
| Temperature                                             | 298.15 K     |               |
| Anharmonic effects                                      | None         |               |
| Anharmonic effects                                      | None         |               |
| Job type: Time-dependent calculation                    |              |               |
| Number of calculated excited states and spin state      | 15           | ['Singlet-A'] |

## c. Results

|                                                           |                      |                 |
|-----------------------------------------------------------|----------------------|-----------------|
| Total molecular energy                                    | -3277.02314 hartrees |                 |
| HOMO number                                               | 47                   |                 |
| LUMO+1 energies                                           | -0.92 eV             |                 |
| LUMO energies                                             | -2.72 eV             |                 |
| HOMO energies                                             | -7.25 eV             |                 |
| HOMO-1 energies                                           | -8.30 eV             |                 |
|                                                           |                      |                 |
| CDFT indices: Electron Affinity                           | 0.0010 hartrees      |                 |
|                                                           |                      |                 |
| CDFT indices: Ionisation Potential                        | 0.0125 hartrees      |                 |
| CDFT indices: Electronegativity                           | 0.0068 hartrees      |                 |
| CDFT indices: Hardness                                    | 0.0116 hartrees      |                 |
| CDFT indices: Electrophilicity                            | 0.0020               |                 |
| CDFT indices: Electron-flow                               | 0.5844 e-            |                 |
|                                                           |                      |                 |
| Geometry optimization specific results                    |                      |                 |
| Converged nuclear repulsion energy                        | 706.02614 Hartrees   |                 |
|                                                           |                      |                 |
| Frequency and Thermochemistry specific results            |                      |                 |
| Enthalpy at 298.15 K                                      | -3276.94987 Hartrees |                 |
| Gibbs free energy at 298.15 K                             | -3276.99167 Hartrees |                 |
| Entropy at 298.15 K                                       | 0.00014 Hartrees     |                 |
|                                                           |                      |                 |
| Mean Mulliken atomic charge and standard deviation        | -0.0000 e-           | 0.4063 e-       |
| Atoms with negatives charges under the standard deviation | N <sup>Å°</sup>      | Mulliken charge |
|                                                           | O 11                 | -0.564          |
|                                                           | O 7                  | -0.564          |
| Atoms with positives charges over the standard deviation  | N <sup>Å°</sup>      | Mulliken charge |
|                                                           | S 1                  | +1.060          |

Table. Selection of the most important condensed Fukui functions based on Mulliken charges.

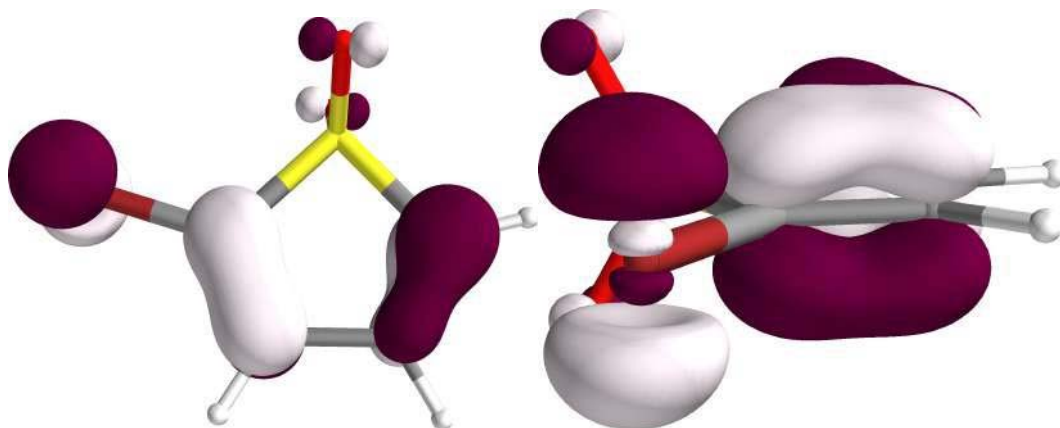

Figure 2: Representation of the HOMO from two points of view.

Table. Most intense (&gt; 50 km/mol) molecular vibrations in wavenumbers

| Frequencies | Intensity | Symmetry |
|-------------|-----------|----------|
| 1333        | 167       | A        |
| 1150        | 134       | A        |
| 697         | 65        | A        |

Table. Results concerning the calculated mono-electronic excitations.

| E.S. | Symmetry  | nm  | cm <sup>-1</sup> | <i>f</i> | R    | $\Lambda$ | <i>d<sub>CT</sub></i> | <i>q<sub>C</sub></i> | <i>r</i>                         | Excitation description : initial OM - end-ing OM (% if > 5%) |
|------|-----------|-----|------------------|----------|------|-----------|-----------------------|----------------------|----------------------------------|--------------------------------------------------------------|
| 1    | Singlet-A | 315 | 31658            | 0.070    | 0.1  | 0.79      | 142.13                | 0.43                 | 47-                              | 48(97);                                                      |
| 2    | Singlet-A | 279 | 35838            | 0.000    | -0.1 | 0.47      | 204.73                | 0.76                 | 46-48(96);                       |                                                              |
| 3    | Singlet-A | 238 | 41907            | 0.000    | 0.1  | 0.52      | 197.43                | 0.68                 | 47-49(95);                       |                                                              |
| 4    | Singlet-A | 236 | 42254            | 0.047    | 0.0  | 0.59      | 213.14                | 0.65                 | 45-48(90);                       |                                                              |
| 5    | Singlet-A | 233 | 42888            | 0.001    | -0.4 | 0.44      | 201.10                | 0.75                 | 43-48(92);                       |                                                              |
| 6    | Singlet-A | 230 | 43473            | 0.036    | 0.3  | 0.50      | 219.23                | 0.75                 | 44-48(91);                       |                                                              |
| 7    | Singlet-A | 206 | 48435            | 0.004    | -0.0 | 0.50      | 210.65                | 0.74                 | 42-48(96);                       |                                                              |
| 8    | Singlet-A | 197 | 50531            | 0.014    | 0.0  | 0.60      | 155.45                | 0.55                 | 41-48(39); 46-49(53);            |                                                              |
| 9    | Singlet-A | 194 | 51329            | 0.028    | 0.1  | 0.62      | 164.20                | 0.55                 | 41-48(50); 46-49(40);            |                                                              |
| 10   | Singlet-A | 181 | 55039            | 0.001    | 0.0  | 0.32      | 236.22                | 0.81                 | 44-49(11); 45-49(78); 47-51(7);  |                                                              |
| 11   | Singlet-A | 178 | 55909            | 0.000    | -0.3 | 0.40      | 133.27                | 0.69                 | 44-49(11); 45-49(15); 47-51(70); |                                                              |
| 12   | Singlet-A | 176 | 56553            | 0.016    | 0.2  | 0.77      | 187.91                | 0.38                 | 40-48(42); 47-50(50);            |                                                              |
| 13   | Singlet-A | 175 | 56892            | 0.001    | 0.3  | 0.45      | 148.86                | 0.69                 | 44-49(72); 47-51(20);            |                                                              |
| 14   | Singlet-A | 175 | 57067            | 0.026    | -0.4 | 0.52      | 154.29                | 0.67                 | 43-49(92);                       |                                                              |
| 15   | Singlet-A | 165 | 60510            | 0.001    | 0.1  | 0.41      | 211.53                | 0.70                 | 47-52(67); 47-53(24);            |                                                              |

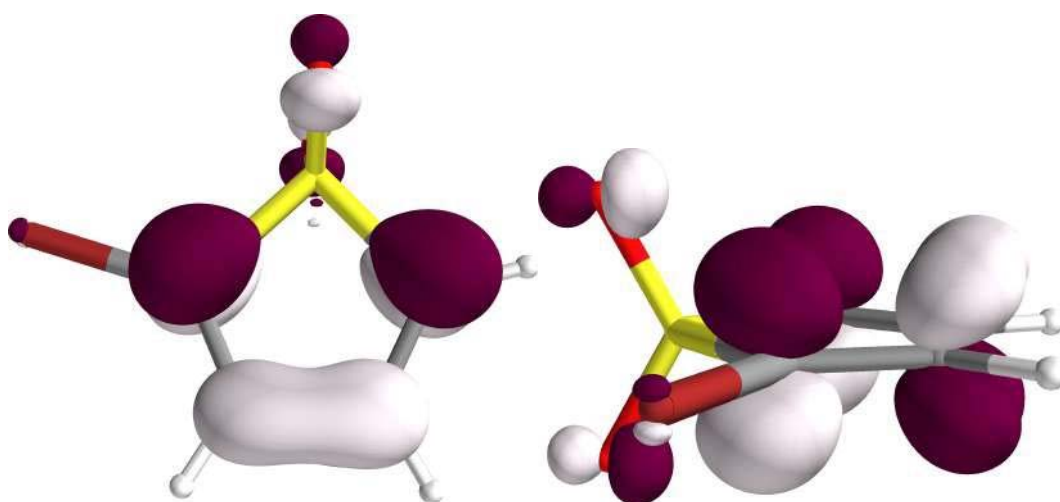

Figure 3: Representation of the LUMO from two points of view.

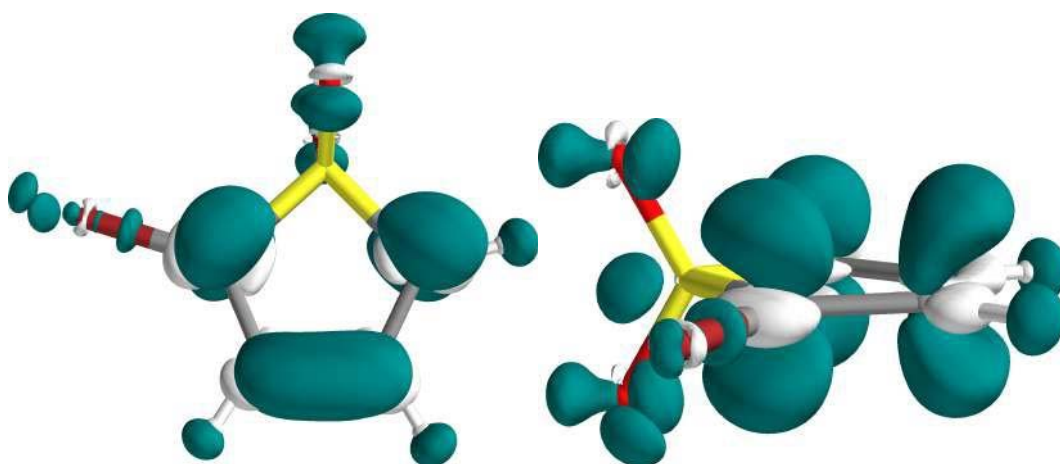

Figure 4: Representation of the F+ function from two points of view. The Blue color indicate the most electrophilic regions.

Table. Converged cartesian atomic coordinates in Angstroms

| Atom | X       | Y       | Z       |
|------|---------|---------|---------|
| S    | -1.1563 | -0.6883 | 0.0002  |
| C    | 0.1831  | 0.5467  | -0.0011 |
| C    | -0.3277 | 1.7734  | -0.0001 |
| C    | -1.8067 | 1.7961  | 0.0004  |
| C    | -2.3953 | 0.6039  | 0.0013  |
| Br   | 1.9639  | -0.0150 | -0.0003 |
| O    | -1.1619 | -1.4088 | 1.2536  |
| H    | -2.3483 | 2.7331  | -0.0005 |
| H    | 0.2619  | 2.6793  | 0.0008  |
| H    | -3.4422 | 0.3457  | -0.0002 |
| O    | -1.1665 | -1.4088 | -1.2533 |

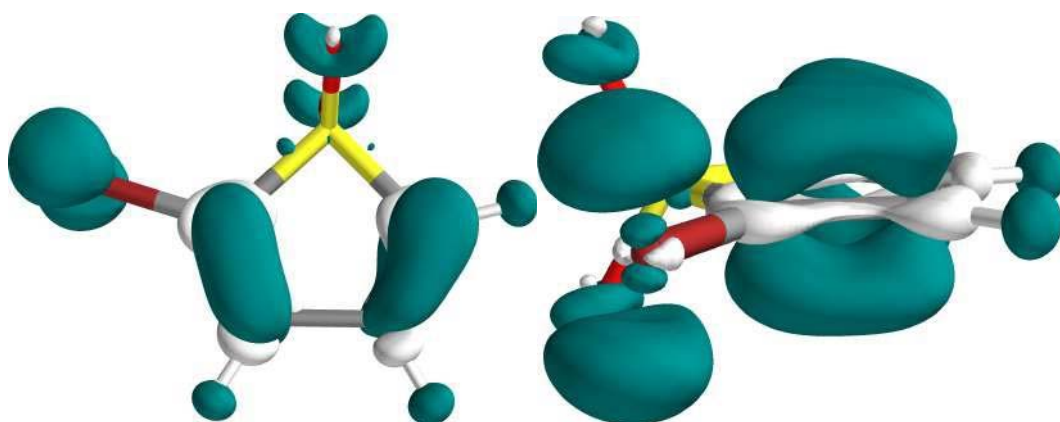

Figure 5: Representation of the F- function from two points of view. The Blue color indicate the most nucleophilic regions.

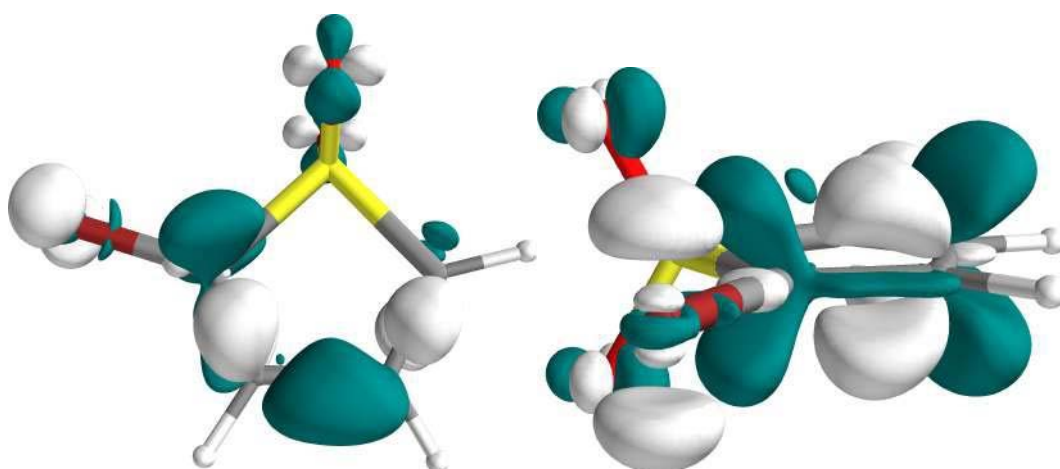

Figure 6: Representation of the Dual descriptor from two points of view. Electrophilic and nucleophilic regions correspond to blue and white surfaces.

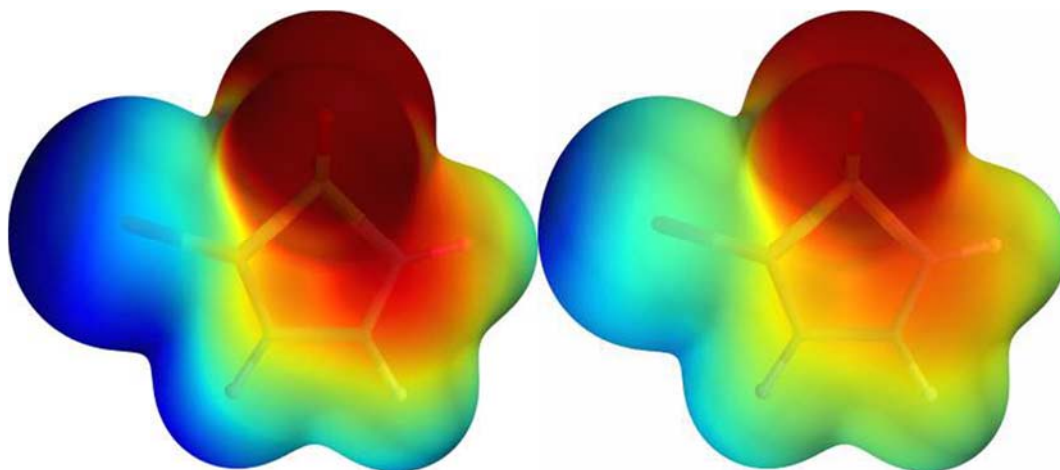

Figure 7: Representations of the Molecular Electrostatic Potential mapped on the electron density (cutoff value of

$0.002 e^-/\text{bohr}^3$ ). On the left, red, blue and green regions correspond to negative values  $< -0.06$  a.u., positive values  $>$

$0.08$  a.u. and neutral values respectively. On the right, the scale is set automatically to highlight the minimum values in red and the maximum values in blues.

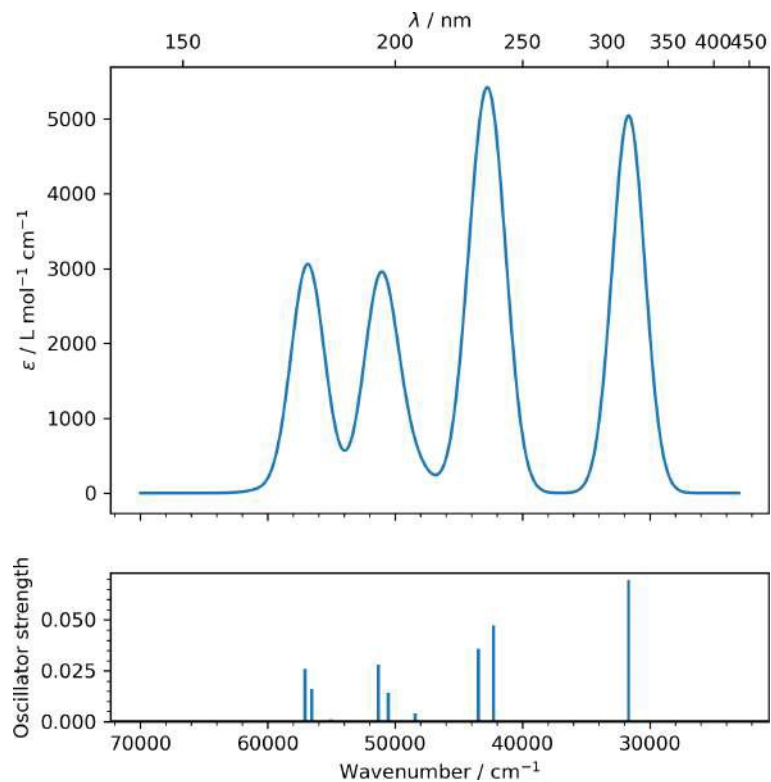

Figure 8: Calculated UV visible Absorption spectrum with a gaussian broadening (FWHM = 3000  $\text{cm}^{-1}$ )

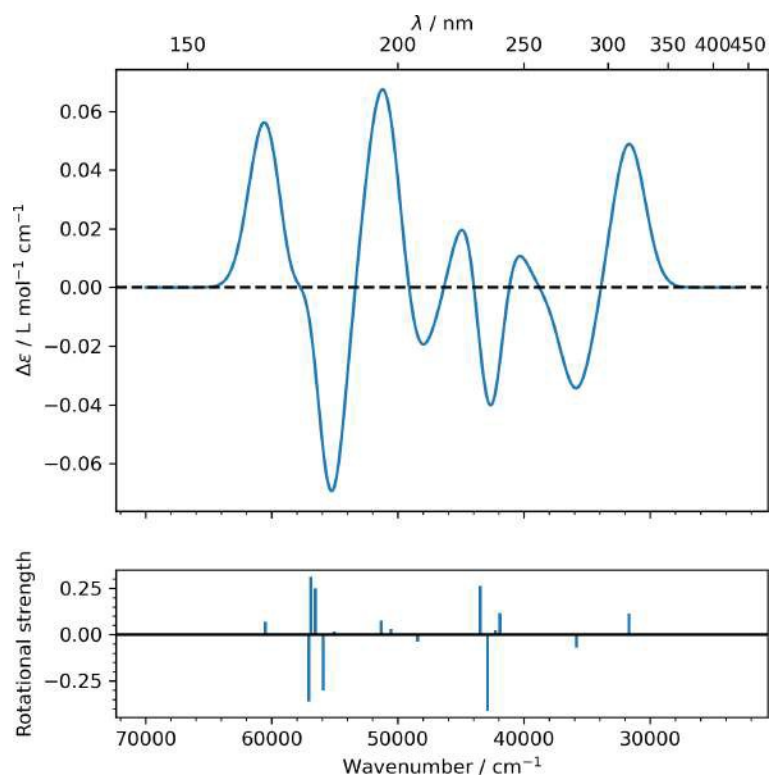

Figure 9: Calculated Circular Dichroism spectrum with a gaussian broadening (FWHM = 3000  $\text{cm}^{-1}$ )



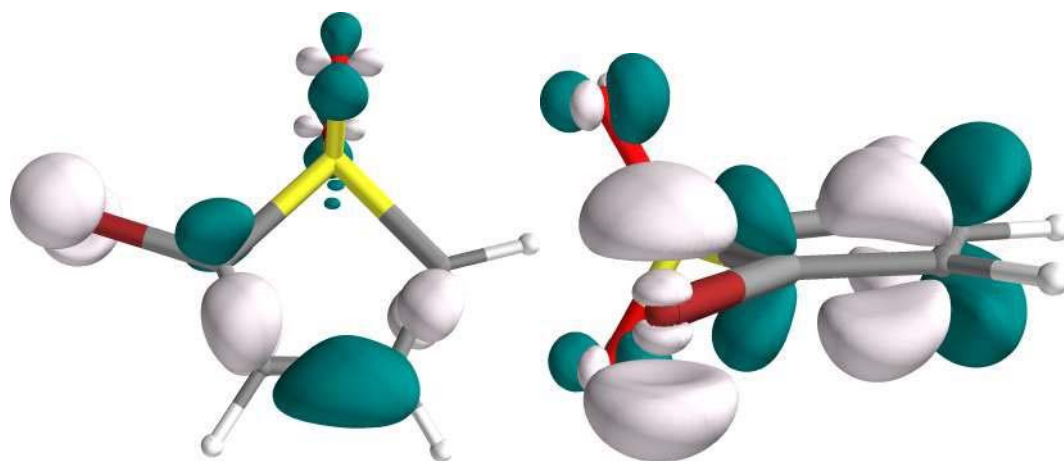

Figure 10: Representation of the Electron Density Difference (S1-S0) from two points of view.

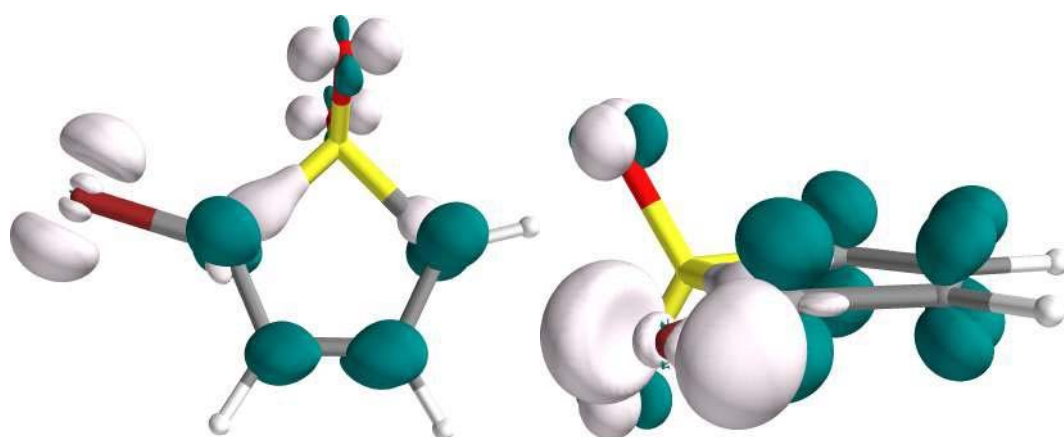

Figure 11: Representation of the Electron Density Difference (S2-S0) from two points of view.

# 10- Cycloadduct 2-CySO

## a- Description

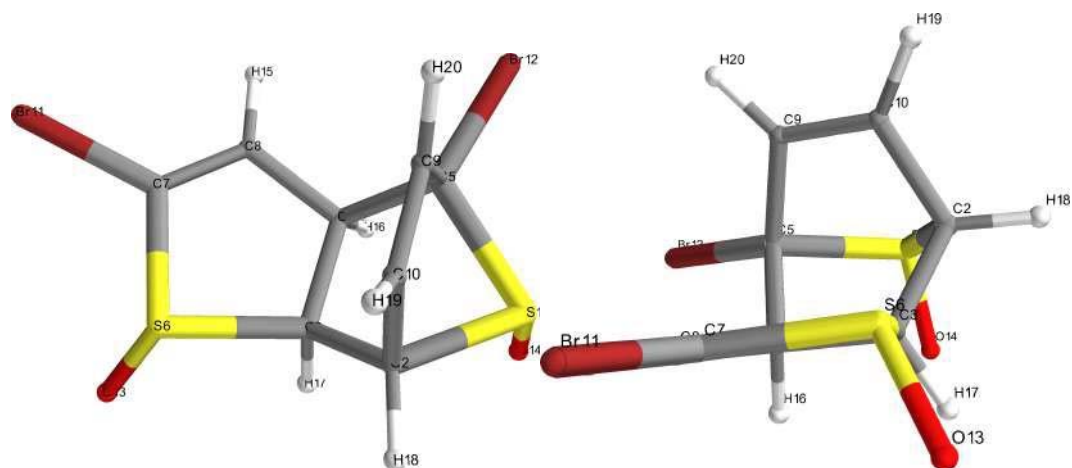

Figure 1: Chemical structure diagram with atomic numbering from two points of view.

|                   |             |
|-------------------|-------------|
| Directory name    | 2-CySO      |
| Formula           | C8H6Br2O2S2 |
| Charge            | 0           |
| Spin multiplicity | 1           |

## b- Computational details

|                                                         |              |             |
|---------------------------------------------------------|--------------|-------------|
| Software                                                | Gaussian     | (2009+D.01) |
| Computational method                                    | DFT          |             |
| Functional                                              | B3LYP        |             |
| Basis set name                                          | 6-311G(2d,p) |             |
| Number of basis set functions                           | 426          |             |
| Closed shell calculation                                | True         |             |
| Requested SCF convergence on RMS and Max density matrix | 1e-08        | 1e-06       |
| Requested SCF convergence on energy                     | 1e-06        |             |
| Job type: Geometry optimization                         |              |             |
| Max Force value and threshold                           | 0.000100     | 0.000450    |
| RMS Force value and threshold                           | 0.000021     | 0.000300    |
| Max Displacement value and threshold                    | 0.001761     | 0.001800    |
| RMS Displacement value and threshold                    | 0.000407     | 0.001200    |
| Job type: Frequency and thermochemical analysis         |              |             |
| Temperature                                             | 298.15 K     |             |
| Anharmonic effects                                      | None         |             |
| Anharmonic effects                                      | None         |             |

## c- Results

|                        |                      |
|------------------------|----------------------|
| Total molecular energy | -6403.61982 hartrees |
| HOMO number            | 86                   |
| LUMO+1 energies        | -1.44 eV             |
| LUMO energies          | -1.90 eV             |
| HOMO energies          | -6.84 eV             |
| HOMO-1 energies        | -7.15 eV             |

Geometry optimization specific results

|                                    |                     |
|------------------------------------|---------------------|
| Converged nuclear repulsion energy | 1981.64527 Hartrees |
|------------------------------------|---------------------|

Frequency and Thermochemistry specific results

|                      |                      |
|----------------------|----------------------|
| Enthalpy at 298.15 K | -6403.48045 Hartrees |
|----------------------|----------------------|

|                               |                      |
|-------------------------------|----------------------|
| Gibbs free energy at 298.15 K | -6403.53669 Hartrees |
|-------------------------------|----------------------|

|                     |                  |
|---------------------|------------------|
| Entropy at 298.15 K | 0.00019 Hartrees |
|---------------------|------------------|

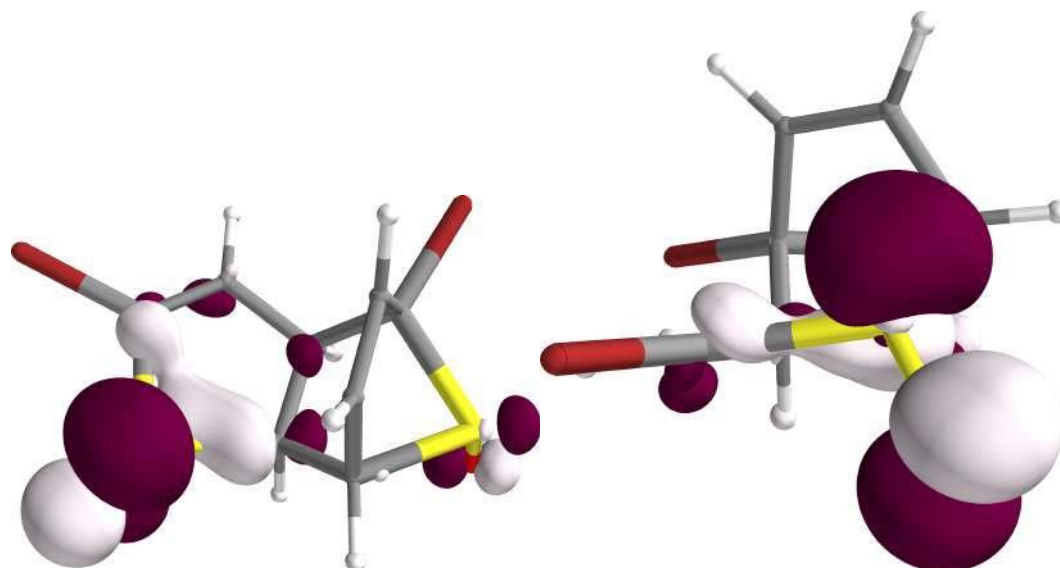

Figure 2: Representation of the HOMO from two points of view.

Table. Most intense (> 50 km/mol) molecular vibrations in wavenumbers

| Frequencies | Intensity | Symmetry |
|-------------|-----------|----------|
| 1141        | 57        | A        |
| 1124        | 71        | A        |
| 1086        | 117       | A        |

Table. Converged cartesian atomic coordinates in Angstroms

| Atom | X       | Y       | Z       |
|------|---------|---------|---------|
| S    | -2.6405 | 1.3811  | 0.0672  |
| C    | -0.9476 | 2.0292  | 0.6841  |
| C    | -0.0065 | 1.5065  | -0.4096 |
| C    | -0.4374 | 0.0529  | -0.7306 |
| C    | -1.5982 | -0.2337 | 0.2595  |
| S    | 1.8010  | 1.5484  | 0.1177  |
| C    | 1.8776  | -0.2543 | -0.1948 |
| C    | 0.7540  | -0.8412 | -0.5801 |
| C    | -1.2217 | -0.0639 | 1.6900  |
| C    | -0.8677 | 1.2048  | 1.9292  |
| Br   | 3.5491  | -1.0980 | 0.0788  |
| Br   | -2.5979 | -1.8515 | -0.1558 |
| O    | 2.5544  | 2.2763  | -0.9406 |
| O    | -2.8280 | 1.7100  | -1.3660 |
| H    | 0.6766  | -1.9038 | -0.7788 |
| H    | -0.8544 | -0.0105 | -1.7388 |
| H    | -0.0191 | 2.1415  | -1.2944 |
| H    | -0.9505 | 3.1077  | 0.8119  |
| H    | -0.5738 | 1.6027  | 2.8909  |
| H    | -1.2613 | -0.8677 | 2.4109  |

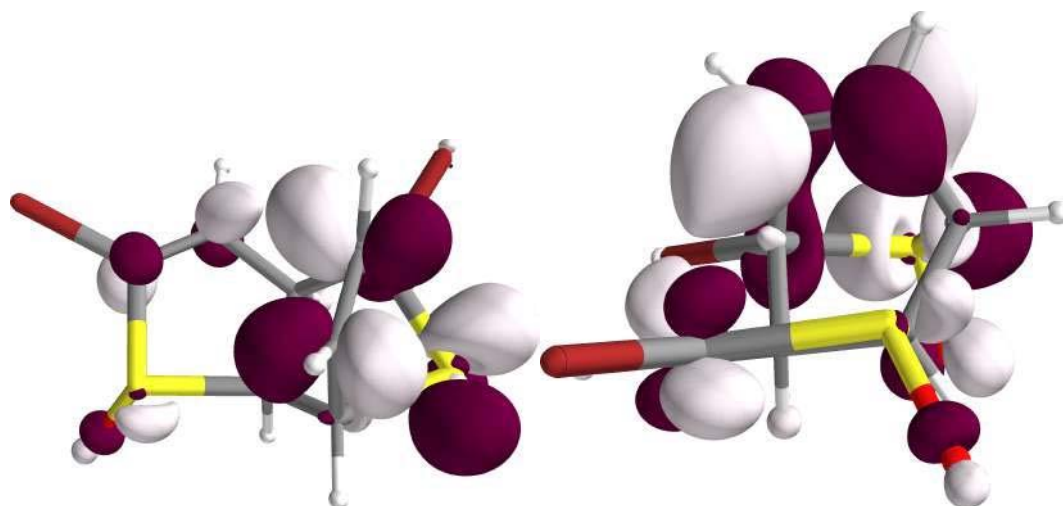

Figure 3: Representation of the LUMO from two points of view.

# 11- Cycloadduct 2-Cymix

## a. Description

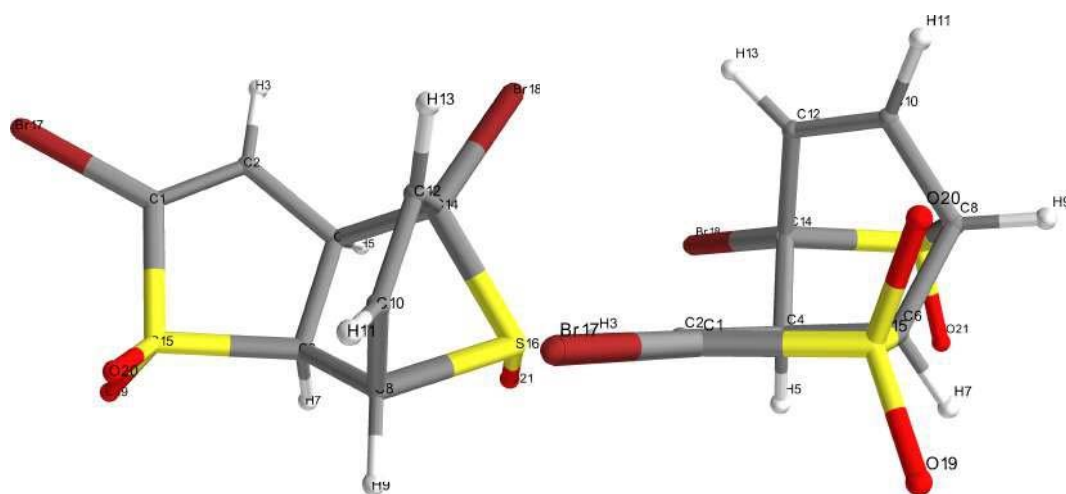

Figure 1: Chemical structure diagram with atomic numbering from two points of view.

|                     |                                                                         |
|---------------------|-------------------------------------------------------------------------|
| Directory name      | 2-Cymix                                                                 |
| Formula             | C8H6Br2O3S2                                                             |
| Charge              | 0                                                                       |
| Spin multiplicity   | 1                                                                       |
| Monoisotopic mass   | 371.81251 Da                                                            |
| InChI               | 1S/C8H6Br2O3S2/c9-6-3-4-7(15(6,12)13)5-1-2-8(4,10)14(5)11/h1-5,7H/t4-   |
| ,5+,7+,8-,14-/m1/s1 | SMILES                                                                  |
|                     | <chem>C1(=C[C@@H]2[C@@H]([C@@H]3C=C[C@]2([S@@]3=O)Br)S1(=O)=O)Br</chem> |

## b. Computational details

|                                                         |              |             |
|---------------------------------------------------------|--------------|-------------|
| Software                                                | Gaussian     | (2009+D.01) |
| Computational method                                    | DFT          |             |
| Functional                                              | B3LYP        |             |
| Basis set name                                          | 6-311G(2d,p) |             |
| Number of basis set functions                           | 449          |             |
| Closed shell calculation                                | True         |             |
| Requested SCF convergence on RMS and Max density matrix | 1e-08        | 1e-06       |
| Requested SCF convergence on energy                     | 1e-06        |             |
| Job type: Geometry optimization                         |              |             |
| Max Force value and threshold                           | 0.000103     | 0.000450    |
| RMS Force value and threshold                           | 0.000016     | 0.000300    |
| Max Displacement value and threshold                    | 0.001400     | 0.001800    |
| RMS Displacement value and threshold                    | 0.000237     | 0.001200    |

## c. Results

|                                                           |                      |                 |
|-----------------------------------------------------------|----------------------|-----------------|
| Total molecular energy                                    | -6478.86581 hartrees |                 |
| HOMO number                                               | 90                   |                 |
| LUMO+1 energies                                           | -1.41 eV             |                 |
| LUMO energies                                             | -1.90 eV             |                 |
| HOMO energies                                             | -7.24 eV             |                 |
| HOMO-1 energies                                           | -7.85 eV             |                 |
| Geometry optimization specific results                    |                      |                 |
| Converged nuclear repulsion energy                        | 2201.37154 Hartrees  |                 |
| Mean Mulliken atomic charge and standard deviation        | -0.0000 e-           | 0.3681 e-       |
| Atoms with negatives charges under the standard deviation | N 1°                 | Mulliken charge |
|                                                           | O 21                 | -0.616          |
|                                                           | O 20                 | -0.585          |
|                                                           | O 19                 | -0.561          |
| Atoms with positives charges over the standard deviation  | N 1°                 | Mulliken charge |
|                                                           | S 16                 | +0.709          |
|                                                           | S 15                 | +1.068          |

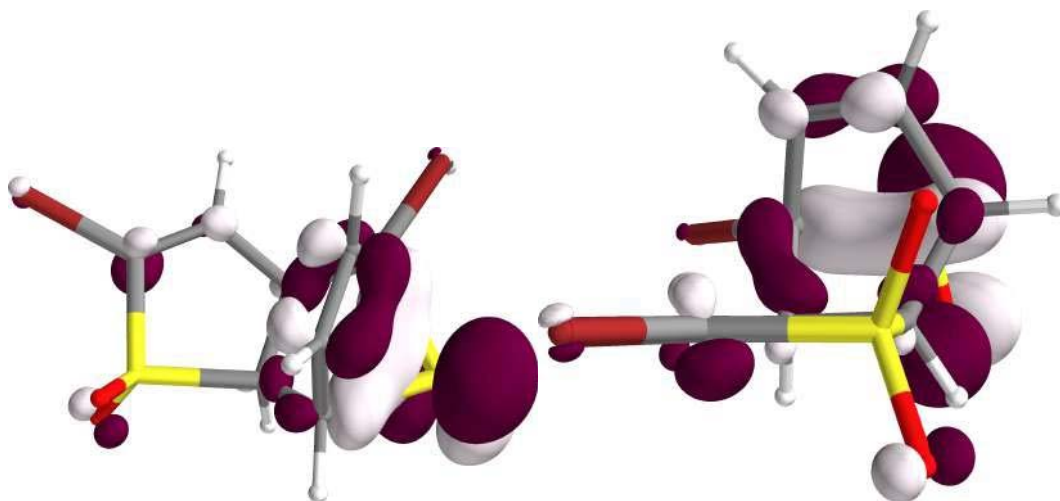

Figure 2: Representation of the HOMO from two points of view.

Table. Converged cartesian atomic coordinates in Angstroms

| Atom | X       | Y       | Z       |
|------|---------|---------|---------|
| C    | 1.7921  | -0.4359 | -0.2574 |
| C    | 0.6220  | -0.9834 | -0.5446 |
| H    | 0.4757  | -2.0526 | -0.6355 |
| C    | -0.5379 | -0.0462 | -0.7530 |
| H    | -0.9481 | -0.1608 | -1.7582 |
| C    | -0.0748 | 1.4162  | -0.5322 |
| H    | -0.1845 | 2.0107  | -1.4364 |
| C    | -0.9178 | 1.9938  | 0.6125  |
| H    | -0.8575 | 3.0723  | 0.7191  |
| C    | -0.8384 | 1.1902  | 1.8696  |
| H    | -0.4693 | 1.5919  | 2.8019  |
| C    | -1.2772 | -0.0585 | 1.6766  |
| H    | -1.3356 | -0.8424 | 2.4178  |
| C    | -1.6990 | -0.2419 | 0.2603  |
| S    | 1.7363  | 1.3627  | -0.2014 |
| S    | -2.6599 | 1.4192  | 0.0569  |
| Br   | 3.4335  | -1.2947 | 0.0684  |
| Br   | -2.7829 | -1.8165 | -0.1005 |
| O    | 2.4462  | 1.9056  | -1.3392 |
| O    | 2.0390  | 1.8362  | 1.1342  |
| O    | -2.8715 | 1.7281  | -1.3780 |

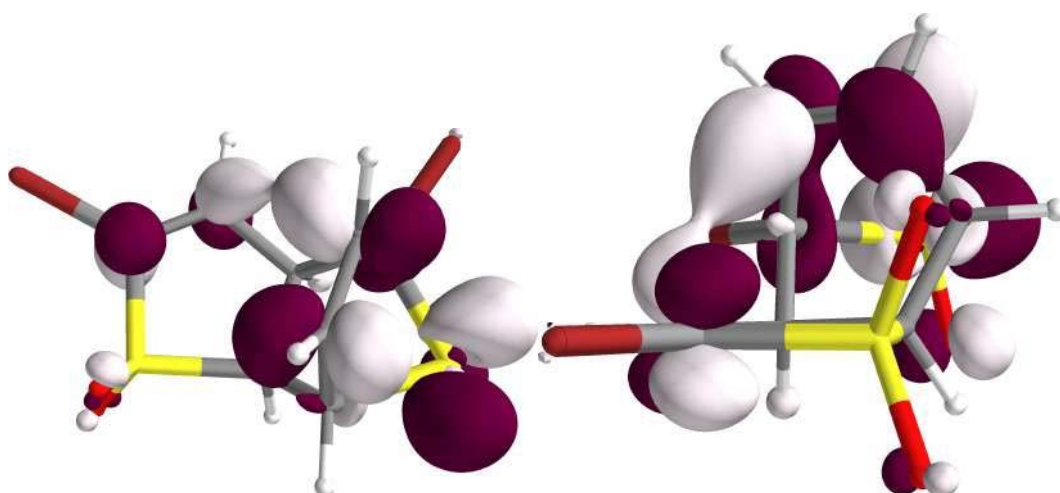

Figure 3: Representation of the LUMO from two points of view.

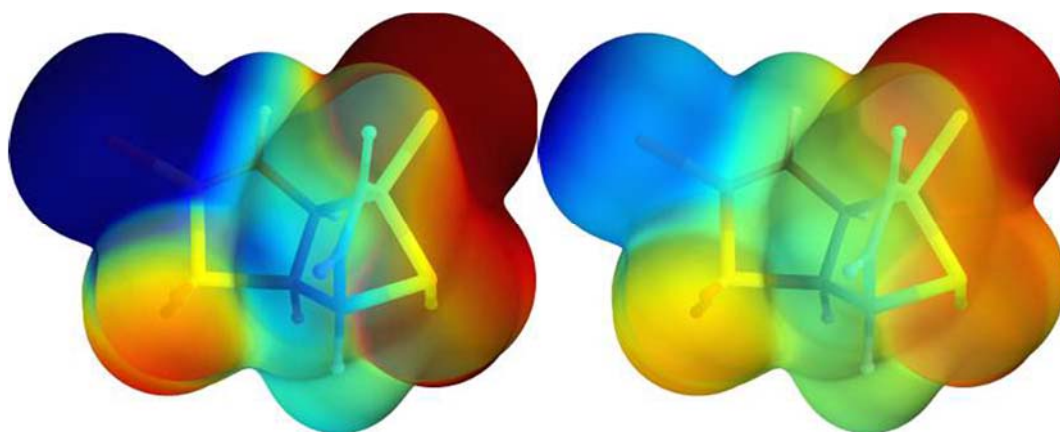

Figure 4: Representations of the Molecular Electrostatic Potential mapped on the electron density (cutoff value of

$0.002 e^-/\text{bohr}^3$ ). On the left, red, blue and green regions correspond to negative values  $< -0.06$  a.u., positive values  $>$

$0.08$  a.u. and neutral values respectively. On the right, the scale is set automatically to highlight the minimum values in red and the maximum values in blues.



# 12- Cycloadduct 2-Cy

## a- Description

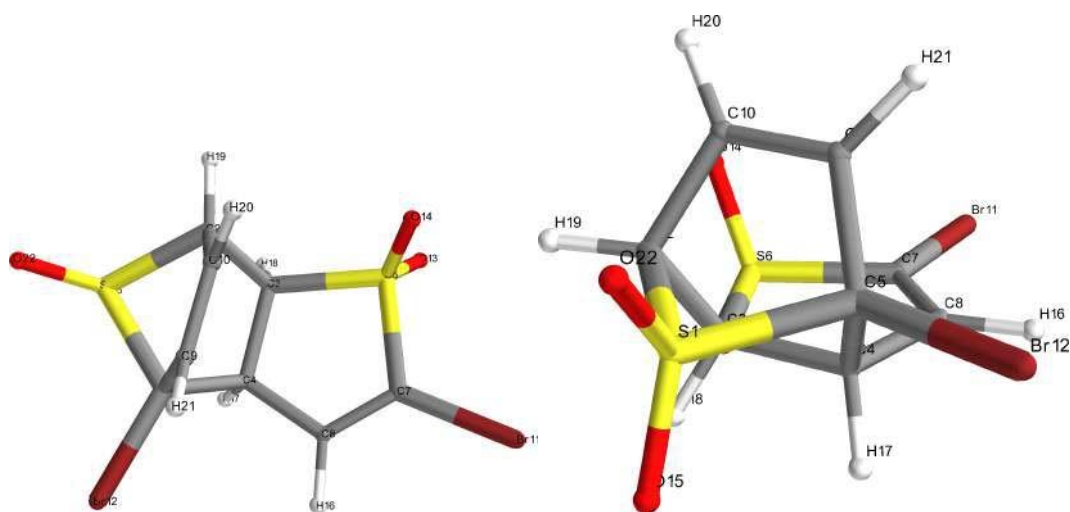

Figure 1: Chemical structure diagram with atomic numbering from two points of view.

|                   |             |
|-------------------|-------------|
| Directory name    | 2-Cy        |
| Formula           | C8H6Br2O4S2 |
| Charge            | 0           |
| Spin multiplicity | 1           |

## b- Computational details

|                                                         |              |             |
|---------------------------------------------------------|--------------|-------------|
| Software                                                | Gaussian     | (2009+D.01) |
| Computational method                                    | DFT          |             |
| Functional                                              | B3LYP        |             |
| Basis set name                                          | 6-311G(2d,p) |             |
| Number of basis set functions                           | 472          |             |
| Closed shell calculation                                | True         |             |
| Requested SCF convergence on RMS and Max density matrix | 1e-08        | 1e-06       |
| Requested SCF convergence on energy                     | 1e-06        |             |
| Job type: Geometry optimization                         |              |             |
| Max Force value and threshold                           | 0.000060     | 0.000450    |
| RMS Force value and threshold                           | 0.000010     | 0.000300    |
| Max Displacement value and threshold                    | 0.001217     | 0.001800    |
| RMS Displacement value and threshold                    | 0.000250     | 0.001200    |

## c- Results

Total molecular energy -6554.09647 hartrees  
HOMO number 94  
LUMO+1 energies -1.54 eV  
LUMO energies -1.81 eV  
HOMO energies -7.91 eV  
HOMO-1 energies -8.19 eV

Geometry optimization specific results  
Converged nuclear repulsion energy 2411.77097 Hartrees

Table. Converged cartesian atomic coordinates in Angstrom

| Atom | X       | Y       | Z       |
|------|---------|---------|---------|
| S    | 2.5299  | -1.2080 | -0.1339 |
| C    | 0.8826  | -1.9170 | 0.5029  |
| C    | -0.0121 | -1.3402 | -0.6098 |
| C    | 0.3672  | 0.1621  | -0.7937 |
| C    | 1.5427  | 0.4097  | 0.1982  |
| S    | -1.8172 | -1.3920 | -0.2241 |
| C    | -1.9693 | 0.4006  | -0.2210 |
| C    | -0.8392 | 1.0211  | -0.5159 |
| C    | 1.1249  | 0.1470  | 1.5999  |
| C    | 0.7614  | -1.1303 | 1.7642  |
| Br   | -3.6504 | 1.1553  | 0.1471  |
| Br   | 2.5327  | 2.0404  | -0.1232 |
| O    | -2.5227 | -1.9356 | -1.3634 |
| O    | -2.0577 | -1.9253 | 1.1004  |
| O    | 2.6933  | -1.4411 | -1.5544 |
| H    | -0.7552 | 2.0987  | -0.5792 |
| H    | 0.7286  | 0.3374  | -1.8079 |
| H    | 0.0910  | -1.8982 | -1.5366 |
| H    | 0.8793  | -2.9990 | 0.5843  |
| H    | 0.4501  | -1.5774 | 2.6960  |
| H    | 1.1693  | 0.9005  | 2.3721  |
| O    | 3.6375  | -1.4017 | 0.7689  |

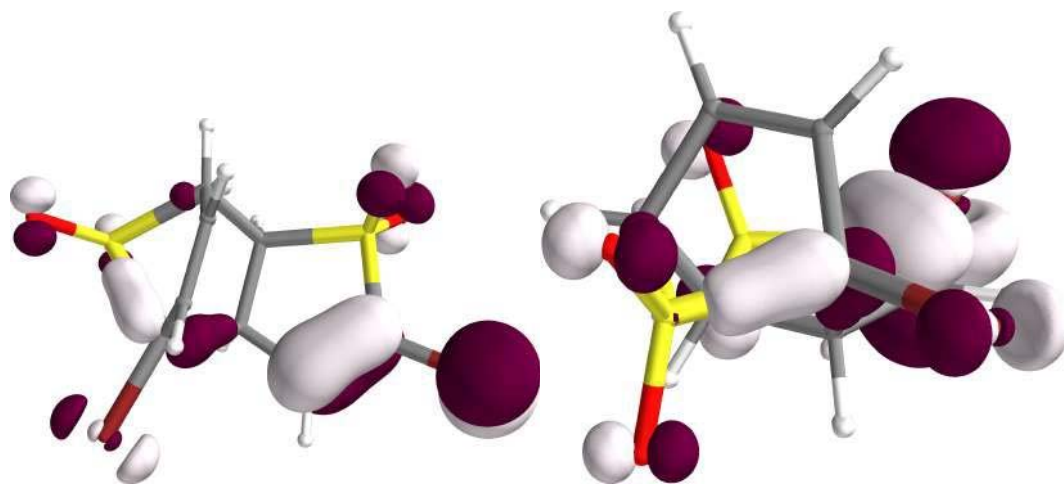

Figure 2: Representation of the HOMO from two points of view.

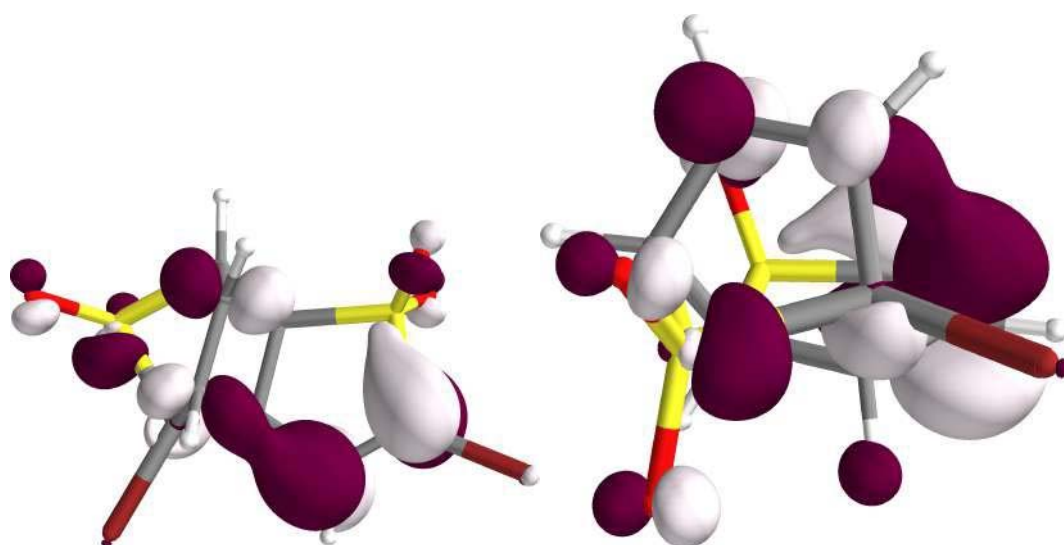

Figure 3: Representation of the LUMO from two points of view.

# 13- 3-bromothiophene 3

## a- Description

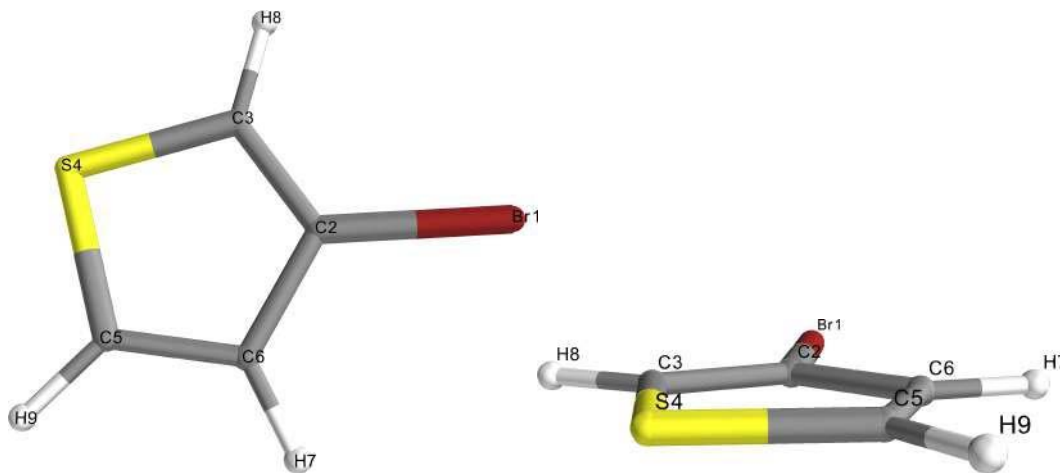

Figure 1: Chemical structure diagram with atomic numbering from two points of view.

|                   |         |
|-------------------|---------|
| Directory name    | 3       |
| Formula           | C4H3BrS |
| Charge            | 0       |
| Spin multiplicity | 1       |

## b- Computational details

|                                                         |                 |             |
|---------------------------------------------------------|-----------------|-------------|
| Software                                                | Gaussian        | (2009+D.01) |
| Computational method                                    | DFT             |             |
| Functional                                              | B3LYP           |             |
| Basis set name                                          | 6-311G(2d,p)    |             |
| Number of basis set functions                           | 190             |             |
| Closed shell calculation                                | True            |             |
| Requested SCF convergence on RMS and Max density matrix | 1e-08           | 1e-06       |
| Requested SCF convergence on energy                     | 1e-06           |             |
| Job type: Geometry optimization                         |                 |             |
| Max Force value and threshold                           | 0.000149        | 0.000450    |
| RMS Force value and threshold                           | 0.000043        | 0.000300    |
| Max Displacement value and threshold                    | 0.000711        | 0.001800    |
| RMS Displacement value and threshold                    | 0.000210        | 0.001200    |
| Job type: Frequency and thermochemical analysis         |                 |             |
| Temperature                                             | 298.15 K        |             |
| Anharmonic effects                                      | None            |             |
| Anharmonic effects                                      | None            |             |
| Job type: Time-dependent calculation                    |                 |             |
| Number of calculated excited states and spin state      | 15[‘Singlet-A’] |             |

## c- Results

|                        |                      |
|------------------------|----------------------|
| Total molecular energy | -3126.61469 hartrees |
| HOMO number            | 39                   |
| LUMO+1 energies        | -0.49 eV             |
| LUMO energies          | -0.86 eV             |
| HOMO energies          | -6.67 eV             |
| HOMO-1 energies        | -7.16 eV             |

|                                        |                    |
|----------------------------------------|--------------------|
| Geometry optimization specific results |                    |
| Converged nuclear repulsion energy     | 437.62442 Hartrees |

|                                                |                      |
|------------------------------------------------|----------------------|
| Frequency and Thermochemistry specific results |                      |
| Enthalpy at 298.15 K                           | -3126.55174 Hartrees |
| Gibbs free energy at 298.15 K                  | -3126.58884 Hartrees |
| Entropy at 298.15 K                            | 0.00012 Hartrees     |

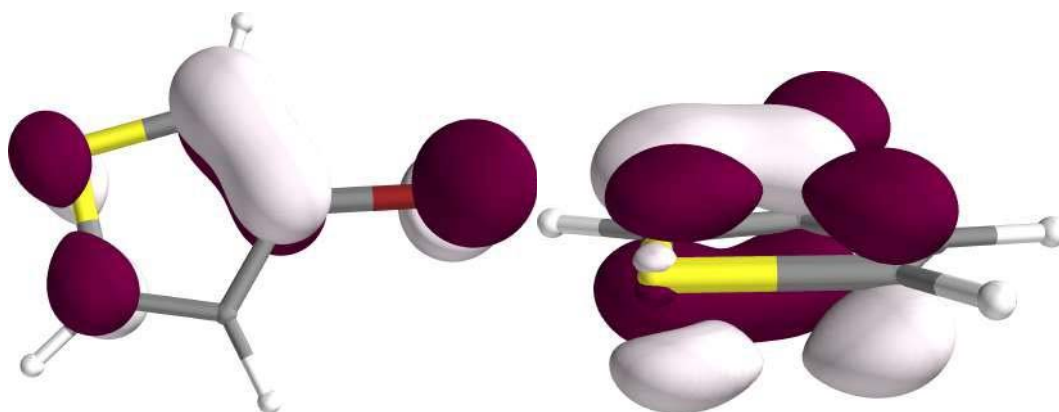

Figure 2: Representation of the HOMO from two points of view.

Table. Most intense (> 50 km/mol) molecular vibrations in avenumbers

| Frequencies | Intensity | Symmetry |
|-------------|-----------|----------|
| 780         | 72        | A        |

Table. Results concerning the calculated mono-electronic excitations.

| E.S. | Symmetry  | nm  | cm <sup>-1</sup> | <i>f</i> | R    | Λ    | <i>d<sub>CT</sub></i> | <i>q<sub>C</sub></i><br><i>τ</i> | Excitation description : initial<br>OM - end-ing OM (% if > 5%) |
|------|-----------|-----|------------------|----------|------|------|-----------------------|----------------------------------|-----------------------------------------------------------------|
| 1    | Singlet-A | 246 | 40604            | 0.000    | 0.0  | 0.59 | 64.90                 | 0.67                             | 39-41(99);                                                      |
| 2    | Singlet-A | 231 | 43243            | 0.078    | -0.0 | 0.78 | 223.46                | 0.41                             | 38-40(6); 39-40(86);                                            |
| 3    | Singlet-A | 222 | 45044            | 0.000    | -0.0 | 0.40 | 182.77                | 0.80                             | 38-41(98);                                                      |
| 4    | Singlet-A | 211 | 47310            | 0.064    | -0.0 | 0.80 | 63.68                 | 0.36                             | 38-40(82); 39-40(8);                                            |
| 5    | Singlet-A | 208 | 48037            | 0.001    | 0.0  | 0.48 | 172.46                | 0.73                             | 39-42(97);                                                      |
| 6    | Singlet-A | 197 | 50648            | 0.001    | 0.0  | 0.25 | 332.82                | 0.91                             | 37-40(98);                                                      |
| 7    | Singlet-A | 194 | 51325            | 0.002    | -0.0 | 0.48 | 119.59                | 0.72                             | 38-42(96);                                                      |
| 8    | Singlet-A | 193 | 51743            | 0.002    | -0.0 | 0.52 | 219.07                | 0.72                             | 37-41(95);                                                      |
| 9    | Singlet-A | 175 | 56870            | 0.153    | -0.0 | 0.61 | 202.50                | 0.43                             | 36-40(37); 39-43(51);                                           |
| 10   | Singlet-A | 173 | 57715            | 0.001    | -0.0 | 0.56 | 56.08                 | 0.62                             | 36-41(92);                                                      |
| 11   | Singlet-A | 172 | 57876            | 0.072    | -0.0 | 0.59 | 222.13                | 0.45                             | 36-40(53); 38-43(12); 39-43(28);                                |
| 12   | Singlet-A | 170 | 58553            | 0.001    | 0.0  | 0.39 | 227.37                | 0.76                             | 39-44(85); 39-45(7);                                            |
| 13   | Singlet-A | 162 | 61440            | 0.006    | 0.0  | 0.42 | 241.08                | 0.69                             | 39-44(7); 39-45(85);                                            |
| 14   | Singlet-A | 161 | 61819            | 0.002    | 0.0  | 0.46 | 124.30                | 0.57                             | 35-40(25); 38-44(69);                                           |
| 15   | Singlet-A | 160 | 62238            | 0.118    | -0.0 | 0.43 | 321.71                | 0.64                             | 37-42(64); 38-43(18);                                           |

Table. Converged cartesian atomic coordinates in Angstroms

| Atom | X       | Y       | Z       |
|------|---------|---------|---------|
| Br   | -1.8732 | -0.0499 | -0.0000 |
| C    | 0.0286  | 0.0585  | 0.0000  |
| C    | 0.8356  | -1.0348 | 0.0000  |
| S    | 2.4969  | -0.5590 | -0.0000 |
| C    | 2.0732  | 1.1171  | 0.0000  |
| C    | 0.7247  | 1.2981  | 0.0000  |
| H    | 0.2374  | 2.2619  | -0.0000 |
| H    | 0.5565  | -2.0747 | 0.0000  |
| H    | 2.8459  | 1.8687  | 0.0000  |

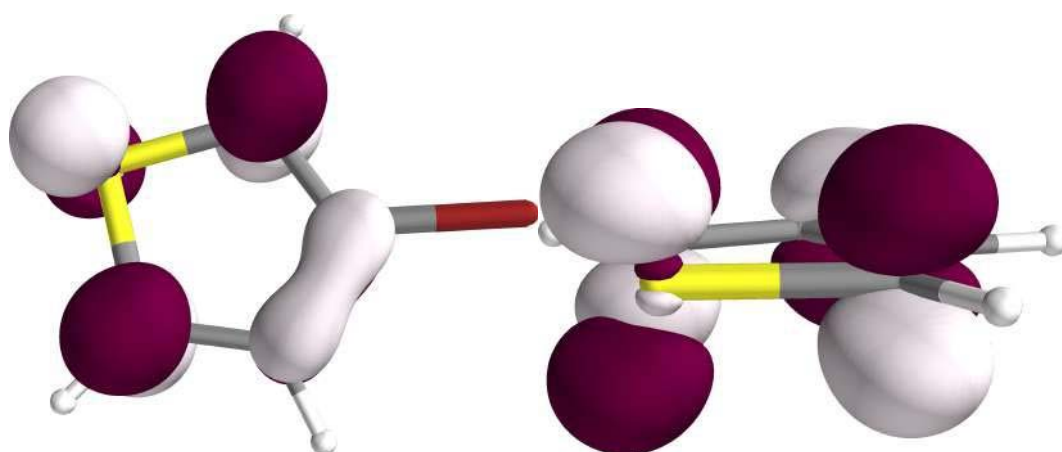

Figure 3: Representation of the LUMO from two points of view.

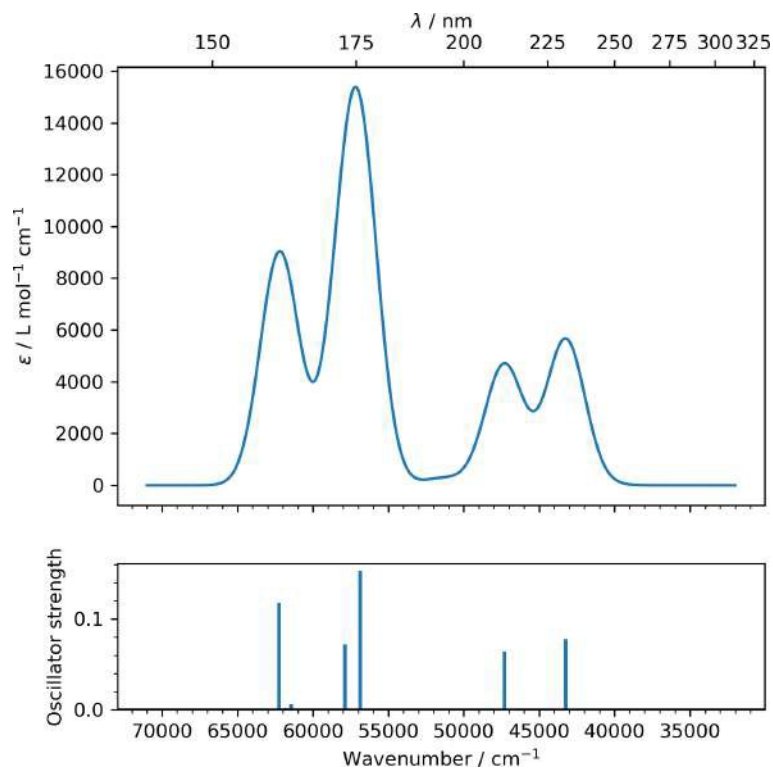

Figure 4: Calculated UV visible Absorption spectrum with a gaussian broadening (FWHM = 3000  $\text{cm}^{-1}$ )

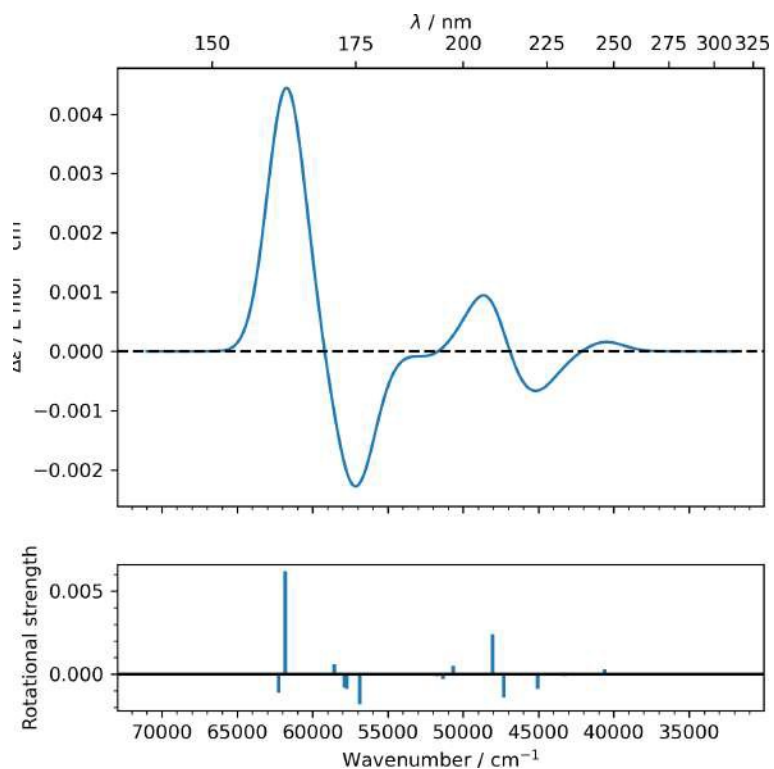

Figure 5: Calculated Circular Dichroism spectrum with a gaussian broadening (FWHM = 3000  $\text{cm}^{-1}$ )



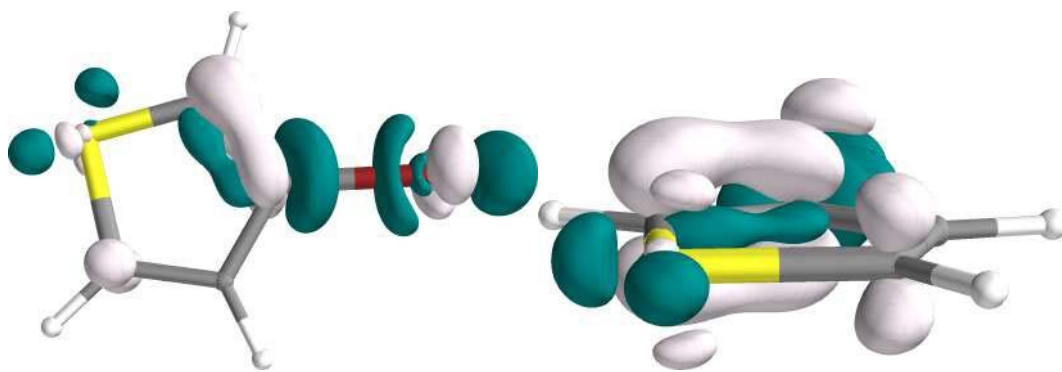

Figure 6: Representation of the Electron Density Difference (S1-S0) from two points of view.

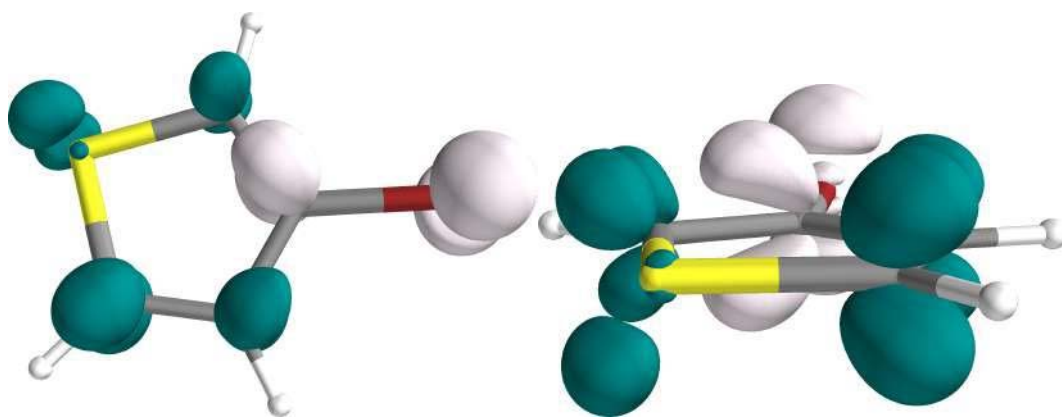

Figure 7: Representation of the Electron Density Difference (S2-S0) from two points of view.

# 14- 3-bromothiophene sulfoxide 3-SO

## a- Description

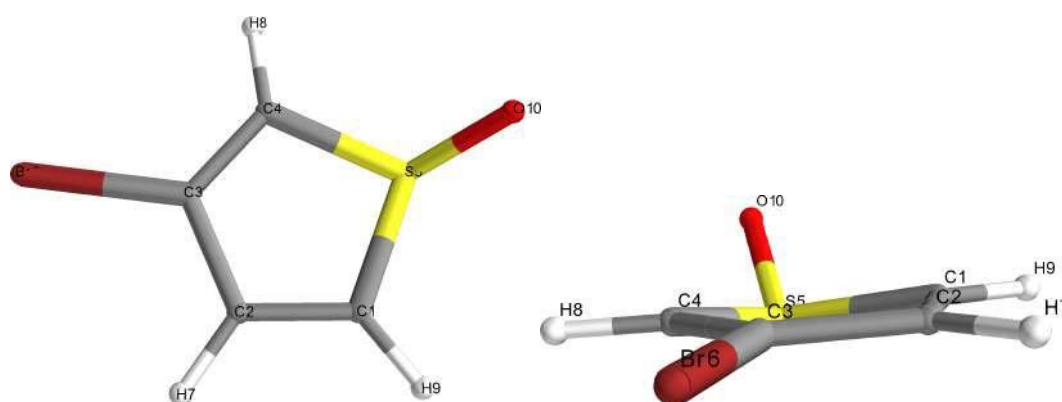

Figure 1: Chemical structure diagram with atomic numbering from two points of view.

|                   |          |
|-------------------|----------|
| Directory name    | 3-SO     |
| Formula           | C4H3BrOS |
| Charge            | 0        |
| Spin multiplicity | 1        |

## b- Computational details

|                                                         |              |             |
|---------------------------------------------------------|--------------|-------------|
| Software                                                | Gaussian     | (2009+D.01) |
| Computational method                                    | DFT          |             |
| Functional                                              | B3LYP        |             |
| Basis set name                                          | 6-311G(2d,p) |             |
| Number of basis set functions                           | 213          |             |
| Closed shell calculation                                | True         |             |
| Requested SCF convergence on RMS and Max density matrix | 1e-08        | 1e-06       |
| Requested SCF convergence on energy                     | 1e-06        |             |
| Job type: Geometry optimization                         |              |             |
| Max Force value and threshold                           | 0.000191     | 0.000450    |
| RMS Force value and threshold                           | 0.000045     | 0.000300    |
| Max Displacement value and threshold                    | 0.001031     | 0.001800    |
| RMS Displacement value and threshold                    | 0.000348     | 0.001200    |
| Job type: Frequency and thermochemical analysis         |              |             |
| Temperature                                             | 298.15 K     |             |
| Anharmonic effects                                      | None         |             |
| Anharmonic effects                                      | None         |             |
| Job type: Time-dependent calculation                    |              |             |
| Number of calculated excited states and spin state A']  | 15           | ['Singlet-  |

## c- Results

|                                                |                      |
|------------------------------------------------|----------------------|
| Total molecular energy                         | -3201.78642 hartrees |
| HOMO number                                    | 43                   |
| LUMO+1 energies                                | -0.85 eV             |
| LUMO energies                                  | -2.44 eV             |
| HOMO energies                                  | -6.75 eV             |
| HOMO-1 energies                                | -7.26 eV             |
| Geometry optimization specific results         |                      |
| Converged nuclear repulsion energy             | 541.86637 Hartrees   |
| Frequency and Thermochemistry specific results |                      |
| Enthalpy at 298.15 K                           | -3201.71938 Hartrees |
| Gibbs free energy at 298.15 K                  | -3201.75952 Hartrees |
| Entropy at 298.15 K                            | 0.00013 Hartrees     |

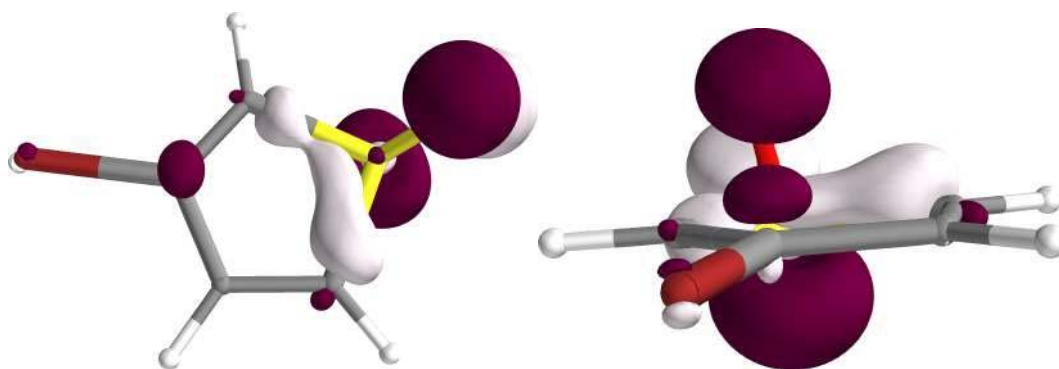

Figure 2: Representation of the HOMO from two points of view.

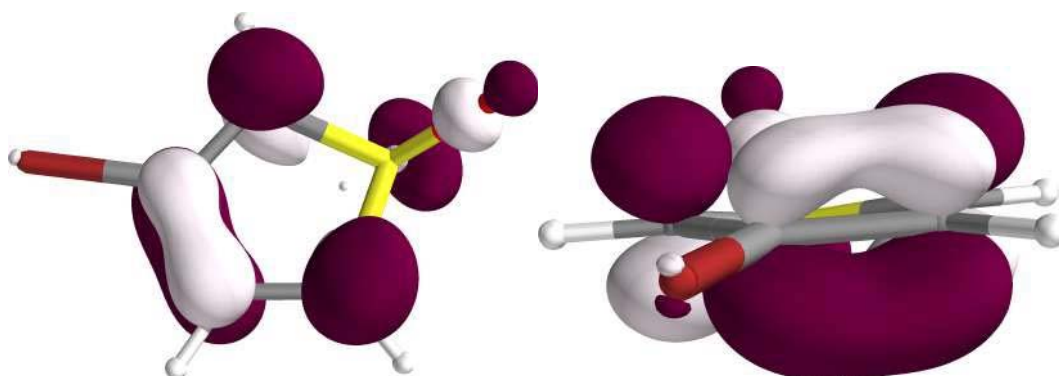

Figure 3: Representation of the LUMO from two points of view.

Table. Most intense (> 50 km/mol) molecular vibrations in

|             |           | wavenumbers |  |          |
|-------------|-----------|-------------|--|----------|
| Frequencies | Intensity |             |  | Symmetry |
| 1112        | 54        |             |  | A        |
| 1092        | 72        |             |  | A        |
| 1037        | 58        |             |  | A        |
| 874         | 55        |             |  | A        |
| 796         | 58        |             |  | A        |

Table. Results concerning the calculated mono-electronic excitations.

| E.S. | Symmetry  | nm  | cm <sup>-1</sup> | <i>f</i> | R     | Λ    | <i>d<sub>CT</sub></i> | <i>q<sub>C</sub></i><br><i>τ</i> | Excitation description : initial<br>OM - end-ing OM (% if > 5%) |
|------|-----------|-----|------------------|----------|-------|------|-----------------------|----------------------------------|-----------------------------------------------------------------|
| 1    | Singlet-A | 377 | 26524            | 0.014    | 0.2   | 0.55 | 195.31                | 0.68                             | 43-<br>44(96);                                                  |
| 2    | Singlet-A | 312 | 32033            | 0.006    | -10.8 | 0.73 | 96.97                 | 0.48                             | 41-44(8); 42-44(88);                                            |
| 3    | Singlet-A | 258 | 38610            | 0.013    | 1.8   | 0.51 | 107.03                | 0.67                             | 41-44(86); 42-44(7);                                            |
| 4    | Singlet-A | 245 | 40685            | 0.016    | -21.8 | 0.46 | 391.46                | 0.66                             | 39-44(6); 42-45(7); 43-45(80);                                  |
| 5    | Singlet-A | 236 | 42229            | 0.003    | 8.5   | 0.43 | 296.49                | 0.76                             | 39-44(16); 40-44(80);                                           |
| 6    | Singlet-A | 232 | 43085            | 0.001    | -3.7  | 0.52 | 214.91                | 0.62                             | 39-44(9); 42-45(82);                                            |
| 7    | Singlet-A | 222 | 44892            | 0.110    | -6.4  | 0.54 | 52.08                 | 0.49                             | 39-44(50); 40-44(12); 43-45(12);<br>43-46(8);                   |
| 8    | Singlet-A | 212 | 47122            | 0.050    | -8.9  | 0.52 | 209.08                | 0.61                             | 39-44(8); 43-46(83);                                            |
| 9    | Singlet-A | 196 | 50954            | 0.017    | 2.8   | 0.57 | 177.09                | 0.50                             | 41-45(37); 42-46(46);                                           |
| 10   | Singlet-A | 192 | 51963            | 0.047    | -2.8  | 0.55 | 131.48                | 0.50                             | 39-45(6); 40-45(24); 41-45(31);<br>42-46(25);                   |
| 11   | Singlet-A | 187 | 53245            | 0.030    | 4.2   | 0.53 | 15.22                 | 0.60                             | 40-45(72); 41-45(12);                                           |
| 12   | Singlet-A | 182 | 54843            | 0.006    | -10.6 | 0.47 | 186.06                | 0.63                             | 39-45(17); 43-47(64);                                           |
| 13   | Singlet-A | 180 | 55419            | 0.005    | -1.3  | 0.50 | 170.04                | 0.54                             | 38-44(11); 39-45(49); 41-45(6);<br>43-47(18);                   |
| 14   | Singlet-A | 176 | 56566            | 0.019    | -10.0 | 0.54 | 113.58                | 0.49                             | 38-44(31); 41-46(10); 43-48(38);                                |
| 15   | Singlet-A | 175 | 57073            | 0.024    | 46.5  | 0.49 | 141.04                | 0.49                             | 38-44(10); 39-45(11); 41-46(16);<br>43-48(43);                  |

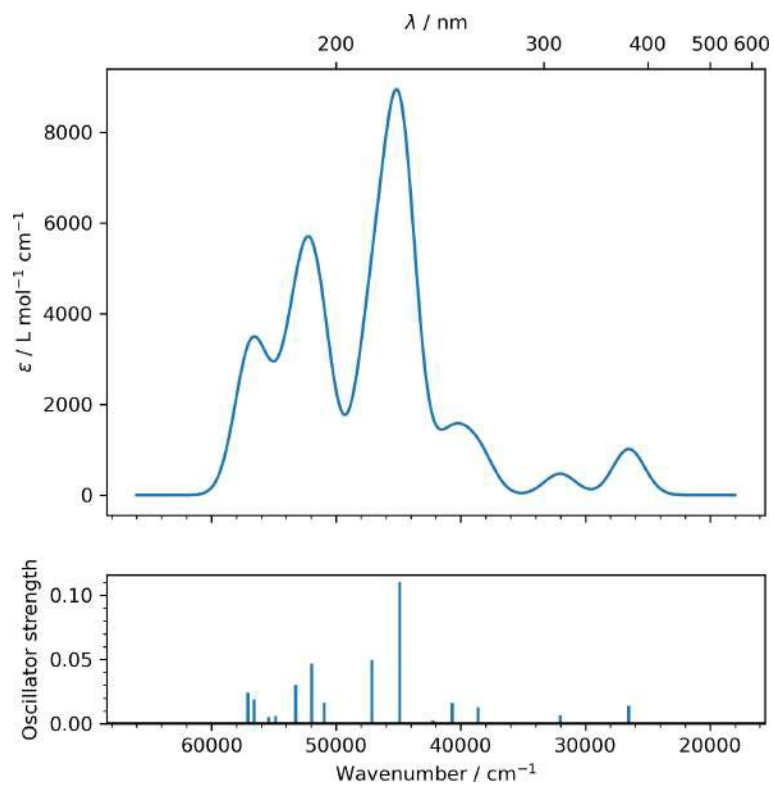

Figure 4: Calculated UV visible Absorption spectrum with a gaussian broadening (FWHM = 3000 cm-1)

Table. Converged cartesian atomic coordinates in Angstroms

| Atom | X       | Y       | Z       |
|------|---------|---------|---------|
| C    | -1.6035 | 1.4144  | 0.0362  |
| C    | -0.2672 | 1.4257  | 0.0776  |
| C    | 0.3081  | 0.0848  | 0.0158  |
| C    | -0.5790 | -0.9082 | -0.0797 |
| S    | -2.2183 | -0.2260 | -0.3542 |
| Br   | 2.1985  | -0.1474 | 0.0271  |
| H    | 0.3498  | 2.3131  | 0.1256  |
| H    | -0.4159 | -1.9694 | -0.1688 |
| H    | -2.2882 | 2.2483  | 0.0411  |
| O    | -3.2814 | -0.7397 | 0.5527  |

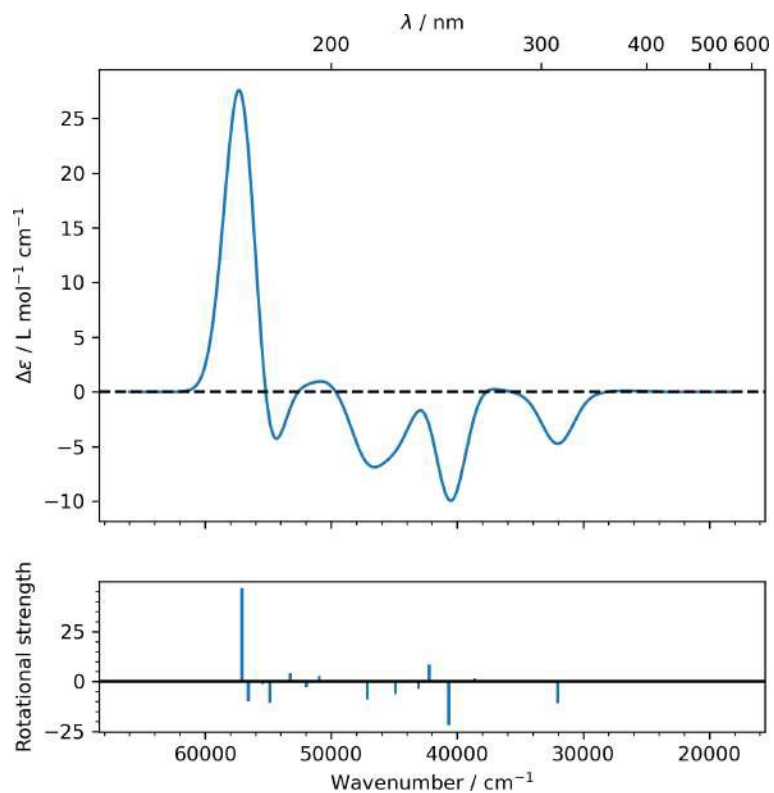

Figure 5: Calculated Circular Dichroism spectrum with a gaussian broadening (FWHM = 3000  $\text{cm}^{-1}$ )

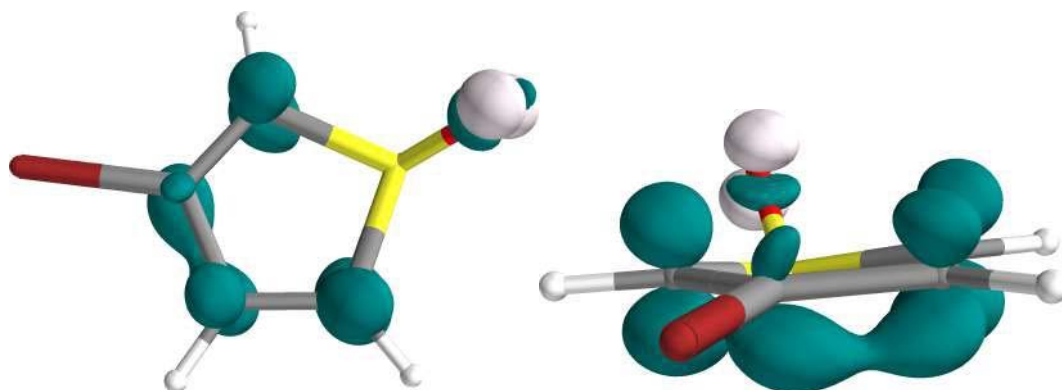

Figure 6: Representation of the Electron Density Difference (S1-S0) from two points of view.

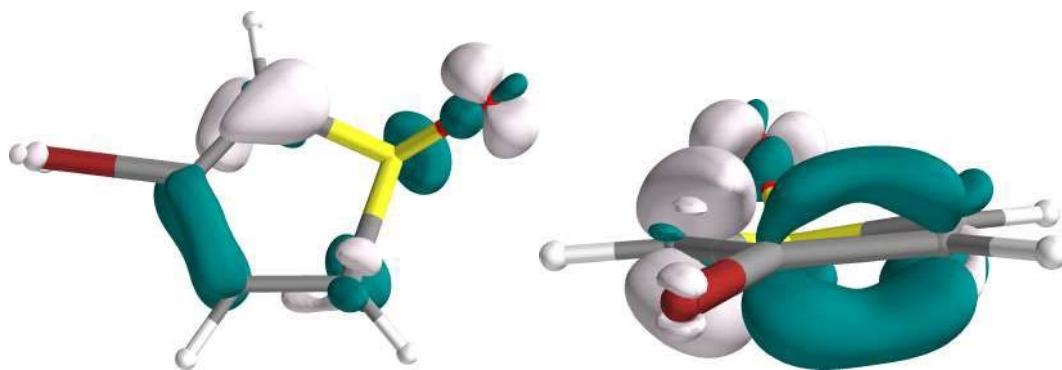

Figure 7: Representation of the Electron Density Difference (S2-S0) from two points of view.

# 15- 3-bromothiophene sulfone 3-SO2

## a- Description

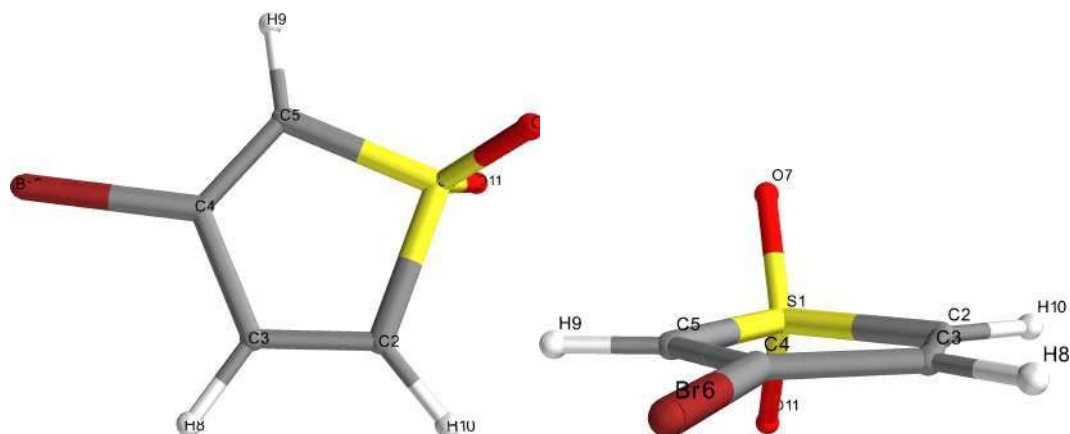

Figure 1: Chemical structure diagram with atomic numbering from two points of view.

|                   |           |
|-------------------|-----------|
| Directory name    | 3-SO2     |
| Formula           | C4H3BrO2S |
| Charge            | 0         |
| Spin multiplicity | 1         |

## b- Computational details

|                                                         |              |             |
|---------------------------------------------------------|--------------|-------------|
| Software                                                | Gaussian     | (2009+D.01) |
| Computational method                                    | DFT          |             |
| Functional                                              | B3LYP        |             |
| Basis set name                                          | 6-311G(2d,p) |             |
| Number of basis set functions                           | 236          |             |
| Closed shell calculation                                | True         |             |
| Requested SCF convergence on RMS and Max density matrix | 1e-08        | 1e-06       |
| Requested SCF convergence on energy                     | 1e-06        |             |
| Job type: Geometry optimization                         |              |             |
| Max Force value and threshold                           | 0.000056     | 0.000450    |
| RMS Force value and threshold                           | 0.000013     | 0.000300    |
| Max Displacement value and threshold                    | 0.000414     | 0.001800    |
| RMS Displacement value and threshold                    | 0.000108     | 0.001200    |
| Job type: Frequency and thermochemical analysis         |              |             |
| Temperature                                             | 298.15 K     |             |
| Anharmonic effects                                      | None         |             |
| Anharmonic effects                                      | None         |             |



## c- Results

|                        |                      |
|------------------------|----------------------|
| Total molecular energy | -3277.02656 hartrees |
| HOMO number            | 47                   |
| LUMO+1 energies        | -1.10 eV             |
| LUMO energies          | -2.82 eV             |
| HOMO energies          | -7.50 eV             |
| HOMO-1 energies        | -8.53 eV             |

|                                        |                    |
|----------------------------------------|--------------------|
| Geometry optimization specific results |                    |
| Converged nuclear repulsion energy     | 672.89356 Hartrees |

|                                                |                      |
|------------------------------------------------|----------------------|
| Frequency and Thermochemistry specific results |                      |
| Enthalpy at 298.15 K                           | -3276.95356 Hartrees |
| Gibbs free energy at 298.15 K                  | -3276.99525 Hartrees |
| Entropy at 298.15 K                            | 0.00014 Hartrees     |

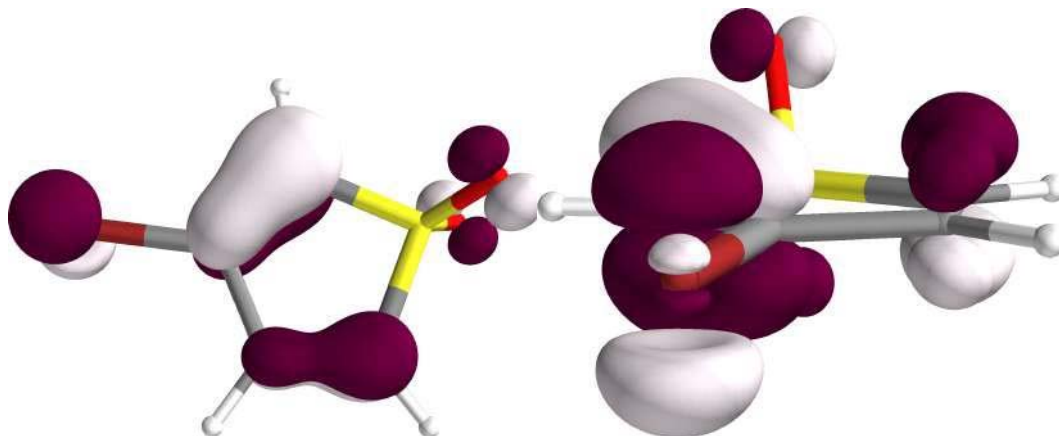

Figure 2: Representation of the HOMO from two points of view.

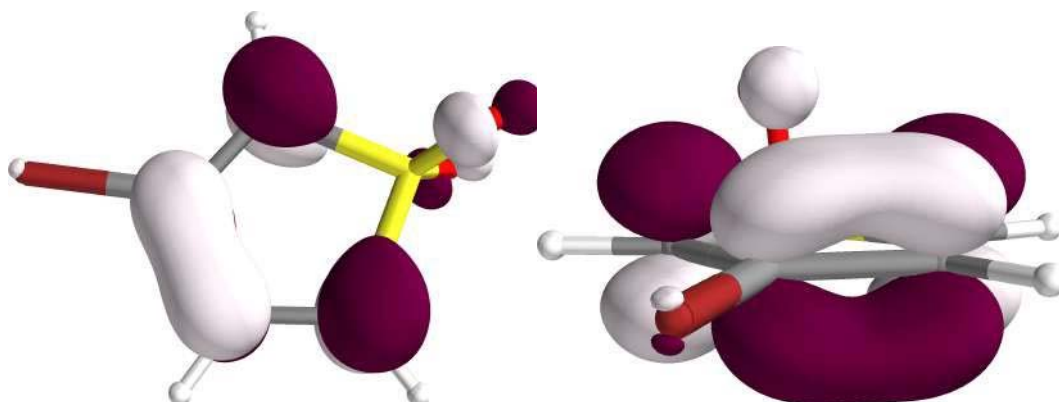

Figure 3: Representation of the LUMO from two points of view.

Table. Most intense (> 50 km/mol) molecular vibrations in wavenumbers

| Frequencies | Intensity | Symmetry |
|-------------|-----------|----------|
| 1324        | 174       | A        |
| 1198        | 100       | A        |
| 1142        | 88        | A        |
| 1009        | 51        | A        |
| 908         | 70        | A        |
| 783         | 61        | A        |

Table. Converged cartesian atomic coordinates in Angstroms

| Atom | X       | Y       | Z       |
|------|---------|---------|---------|
| S    | -2.0136 | -0.1826 | -0.0000 |
| C    | -1.3614 | 1.4906  | 0.0004  |
| C    | -0.0346 | 1.4589  | 0.0003  |
| C    | 0.5262  | 0.0877  | -0.0002 |
| C    | -0.3630 | -0.8955 | -0.0004 |
| Br   | 2.4056  | -0.1495 | -0.0000 |
| O    | -2.6830 | -0.4628 | 1.2524  |
| H    | 0.6079  | 2.3281  | 0.0003  |
| H    | -0.2272 | -1.9641 | -0.0006 |
| H    | -2.0312 | 2.3362  | 0.0004  |
| O    | -2.6835 | -0.4617 | -1.2524 |

# 16- Cycloadduct 3-CySO

## a- Description

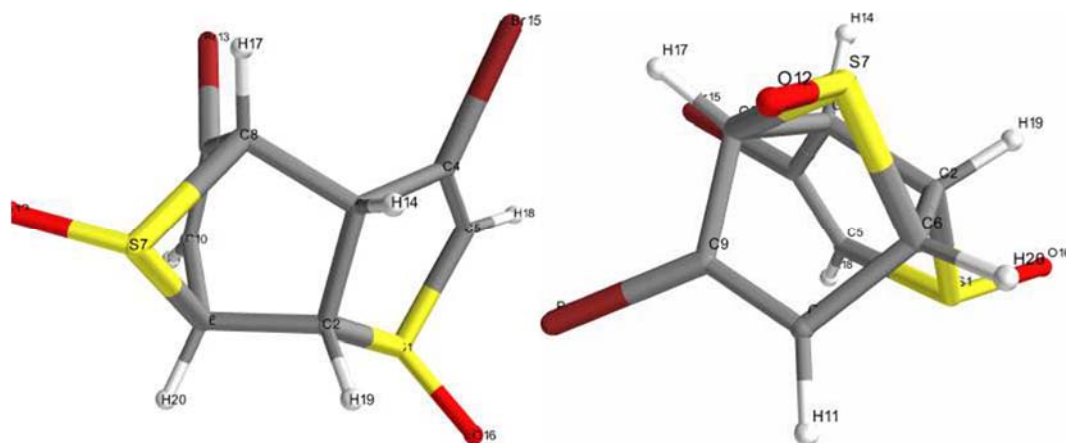

Figure 1: Chemical structure diagram with atomic numbering from two points of view.

|                   |             |
|-------------------|-------------|
| Directory name    | 3-CySO      |
| Formula           | C8H6Br2O2S2 |
| Charge            | 0           |
| Spin multiplicity | 1           |

## b- Computational details

|                                                         |              |             |
|---------------------------------------------------------|--------------|-------------|
| Software                                                | Gaussian     | (2009+D.01) |
| Computational method                                    | DFT          |             |
| Functional                                              | B3LYP        |             |
| Basis set name                                          | 6-311G(2d,p) |             |
| Number of basis set functions                           | 426          |             |
| Closed shell calculation                                | True         |             |
| Requested SCF convergence on RMS and Max density matrix | 1e-08        | 1e-06       |
| Requested SCF convergence on energy                     | 1e-06        |             |
| Job type: Geometry optimization                         |              |             |
| Max Force value and threshold                           | 0.000041     | 0.000450    |
| RMS Force value and threshold                           | 0.000007     | 0.000300    |
| Max Displacement value and threshold                    | 0.000582     | 0.001800    |
| RMS Displacement value and threshold                    | 0.000133     | 0.001200    |
| Job type: Frequency and thermochemical analysis         |              |             |
| Temperature                                             | 298.15 K     |             |
| Anharmonic effects                                      | None         |             |
| Anharmonic effects                                      | None         |             |

## c- Results

|                        |                      |
|------------------------|----------------------|
| Total molecular energy | -6403.61565 hartrees |
| HOMO number            | 86                   |
| LUMO+1 energies        | -1.53 eV             |
| LUMO energies          | -1.92 eV             |
| HOMO energies          | -6.79 eV             |
| HOMO-1 energies        | -7.04 eV             |

|                                                |                      |
|------------------------------------------------|----------------------|
| Geometry optimization specific results         |                      |
| Converged nuclear repulsion energy             | 2005.28079 Hartrees  |
| Frequency and Thermochemistry specific results |                      |
| Enthalpy at 298.15 K                           | -6403.47612 Hartrees |
| Gibbs free energy at 298.15 K                  | -6403.53225 Hartrees |
| Entropy at 298.15 K                            | 0.00019 Hartrees     |

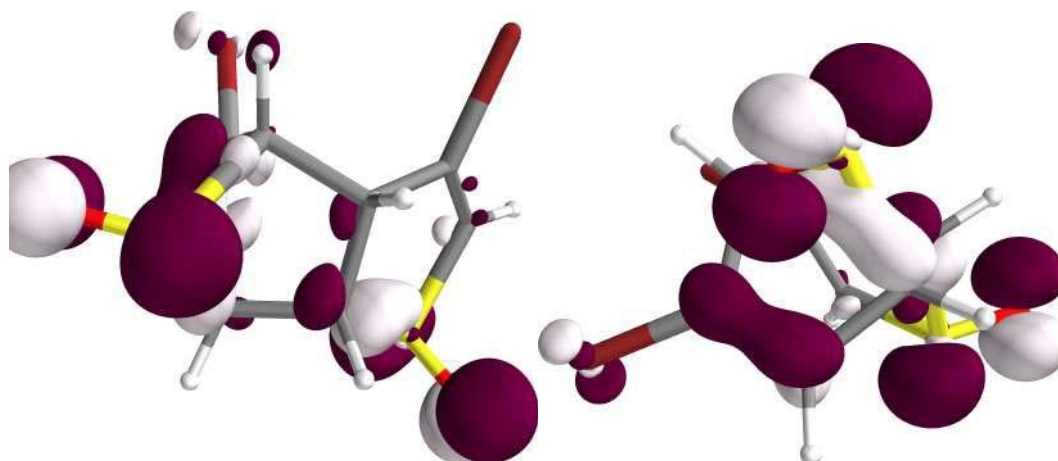

Figure 2: Representation of the HOMO from two points of view.

Table. Most intense (> 50 km/mol) molecular vibrations in wavenumbers

| Frequencies | Intensity | Symmetry |
|-------------|-----------|----------|
| 1644        | 93        | A        |
| 1152        | 142       | A        |
| 1084        | 168       | A        |

Table. Converged cartesian atomic coordinates in Angstroms

| Atom | X       | Y       | Z       |
|------|---------|---------|---------|
| S    | -1.1700 | 2.1776  | -1.3175 |
| C    | -0.1125 | 1.9987  | 0.2392  |
| C    | -0.4752 | 0.6743  | 0.9710  |
| C    | -1.6023 | 0.0502  | 0.2077  |
| C    | -2.0283 | 0.6393  | -0.8962 |
| C    | 1.3920  | 1.9289  | -0.0737 |
| S    | 2.0040  | 1.2502  | 1.6067  |
| C    | 0.8542  | -0.1440 | 0.9995  |
| C    | 1.3633  | -0.3678 | -0.3926 |
| C    | 1.6677  | 0.7751  | -1.0023 |
| H    | 2.0274  | 0.8885  | -2.0138 |
| O    | 3.4237  | 0.8414  | 1.5277  |
| Br   | 1.4704  | -2.1007 | -1.1494 |
| H    | -0.7905 | 0.8516  | 2.0024  |
| Br   | -2.3581 | -1.5664 | 0.8924  |
| O    | -2.0927 | 3.3289  | -1.0955 |
| H    | 0.8505  | -1.0006 | 1.6653  |
| H    | -2.8272 | 0.3106  | -1.5437 |
| H    | -0.3946 | 2.8845  | 0.8073  |
| H    | 1.8588  | 2.8772  | -0.3241 |

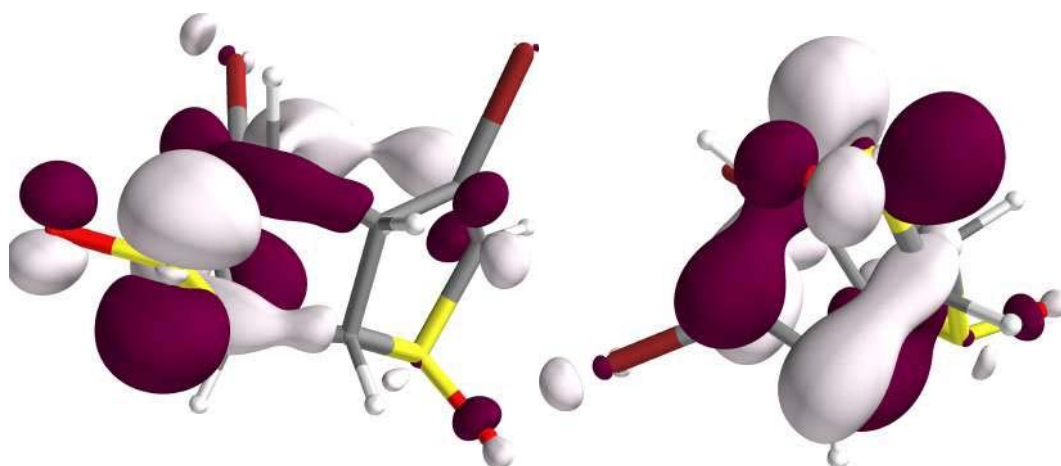

Figure 3: Representation of the LUMO from two points of view.

# 17- Cycloadduct 3-Cymix

## a-Description

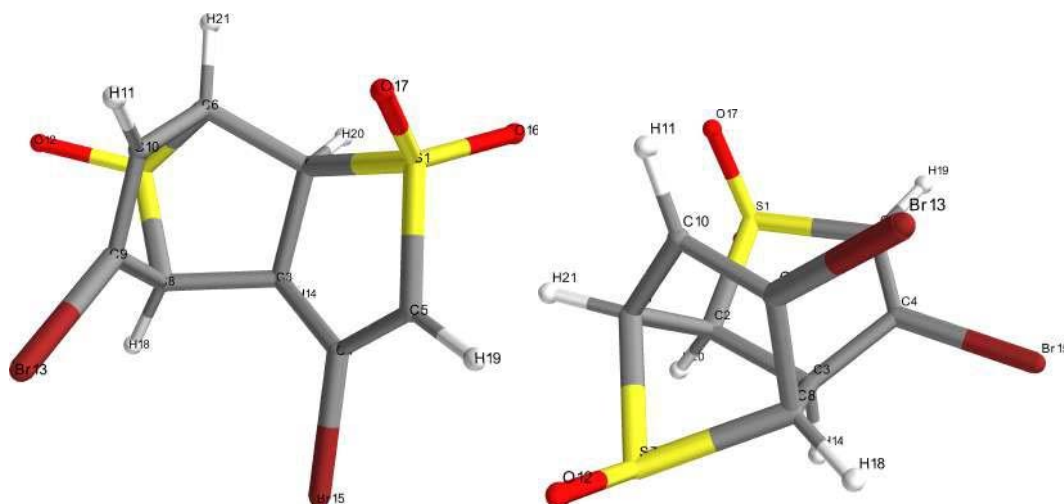

Figure 1: Chemical structure diagram with atomic numbering from two points of view.

|                   |                                                                             |
|-------------------|-----------------------------------------------------------------------------|
| Directory name    | 3-Cymix                                                                     |
| Formula           | C <sub>8</sub> H <sub>6</sub> Br <sub>2</sub> O <sub>3</sub> S <sub>2</sub> |
| Charge            | 0                                                                           |
| Spin multiplicity | 1                                                                           |

## b- Computational details

|                                                         |              |             |
|---------------------------------------------------------|--------------|-------------|
| Software                                                | Gaussian     | (2009+D.01) |
| Computational method                                    | DFT          |             |
| Functional                                              | B3LYP        |             |
| Basis set name                                          | 6-311G(2d,p) |             |
| Number of basis set functions                           | 449          |             |
| Closed shell calculation                                | True         |             |
| Requested SCF convergence on RMS and Max density matrix | 1e-08        | 1e-06       |
| Requested SCF convergence on energy                     | 1e-06        |             |
| Job type: Geometry optimization                         |              |             |
| Max Force value and threshold                           | 0.000129     | 0.000450    |
| RMS Force value and threshold                           | 0.000017     | 0.000300    |
| Max Displacement value and threshold                    | 0.000755     | 0.001800    |
| RMS Displacement value and threshold                    | 0.000161     | 0.001200    |
| Job type: Frequency and thermochemical analysis         |              |             |
| Temperature                                             | 298.15 K     |             |
| Anharmonic effects                                      | None         |             |
| Anharmonic effects                                      | None         |             |

## c- Results

|                        |                      |
|------------------------|----------------------|
| Total molecular energy | -6478.86009 hartrees |
| HOMO number            | 90                   |
| LUMO+1 energies        | -1.59 eV             |
| LUMO energies          | -1.95 eV             |
| HOMO energies          | -6.96 eV             |
| HOMO-1 energies        | -7.69 eV             |

|                                        |                     |
|----------------------------------------|---------------------|
| Geometry optimization specific results |                     |
| Converged nuclear repulsion energy     | 2222.36871 Hartrees |

|                                                |                      |
|------------------------------------------------|----------------------|
| Frequency and Thermochemistry specific results |                      |
| Enthalpy at 298.15 K                           | -6478.71438 Hartrees |
| Gibbs free energy at 298.15 K                  | -6478.77161 Hartrees |
| Entropy at 298.15 K                            | 0.00019 Hartrees     |

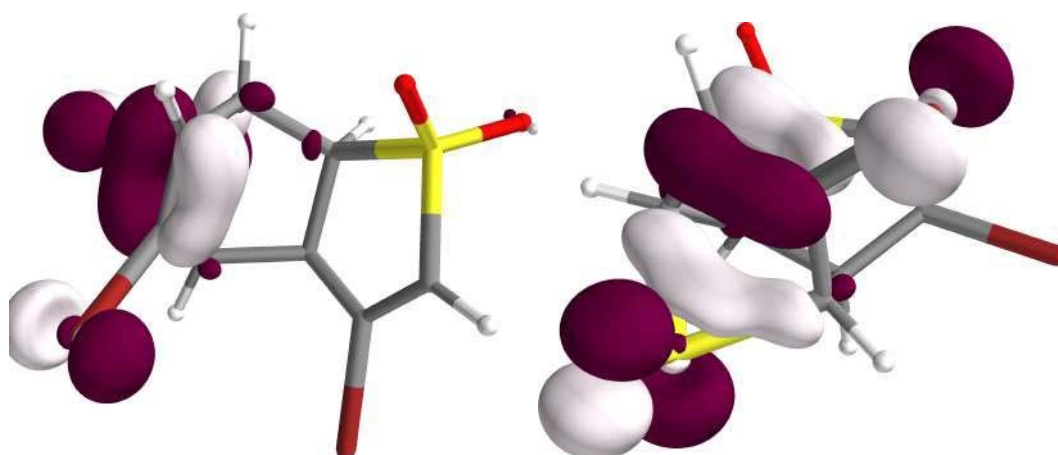

Figure 2: Representation of the HOMO from two points of view.

Table. Most intense (> 50 km/mol) molecular vibrations in wavenumbers

| Frequencies | Intensity | Symmetry |
|-------------|-----------|----------|
| 1653        | 69        | A        |
| 1329        | 68        | A        |
| 1322        | 99        | A        |
| 1237        | 64        | A        |
| 1155        | 152       | A        |
| 1130        | 100       | A        |
| 1125        | 90        | A        |

Table. Converged cartesian atomic coordinates in Angstroms

| Atom | X       | Y       | Z       |
|------|---------|---------|---------|
| S    | -2.1834 | -1.3326 | 0.8232  |
| C    | -0.9640 | -1.6348 | -0.5292 |
| C    | -0.5952 | -0.2376 | -1.1211 |
| C    | -1.3260 | 0.8146  | -0.3291 |
| C    | -2.1144 | 0.4385  | 0.6625  |
| C    | 0.3593  | -2.2822 | -0.0853 |
| S    | 1.3517  | -1.9214 | -1.6877 |
| C    | 0.9611  | -0.1681 | -1.0440 |
| C    | 1.4140  | -0.2699 | 0.3820  |
| C    | 1.0758  | -1.4326 | 0.9297  |
| H    | 1.2317  | -1.7358 | 1.9526  |
| O    | 2.7839  | -2.2402 | -1.5068 |
| Br   | 2.2869  | 1.1670  | 1.2551  |
| H    | -0.9031 | -0.1661 | -2.1664 |
| Br   | -1.1006 | 2.6310  | -0.8435 |
| O    | -3.4832 | -1.8022 | 0.3864  |
| O    | -1.6631 | -1.7566 | 2.1078  |
| H    | 1.4149  | 0.6068  | -1.6526 |
| H    | -2.7147 | 1.0506  | 1.3176  |
| H    | -1.5073 | -2.2516 | -1.2425 |
| H    | 0.2989  | -3.3452 | 0.1267  |

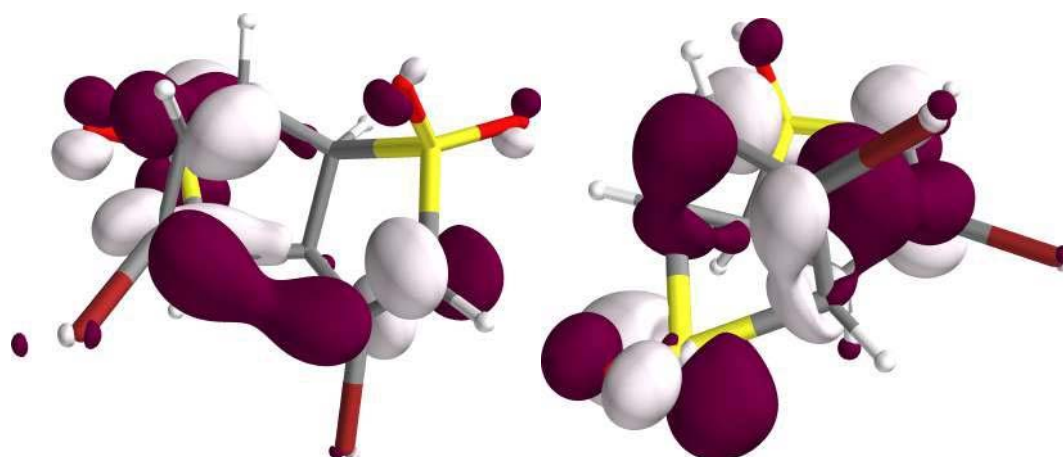

Figure 3: Representation of the LUMO from two points of view.



# 18- Cycloadduct 3-Cy

## a- Description

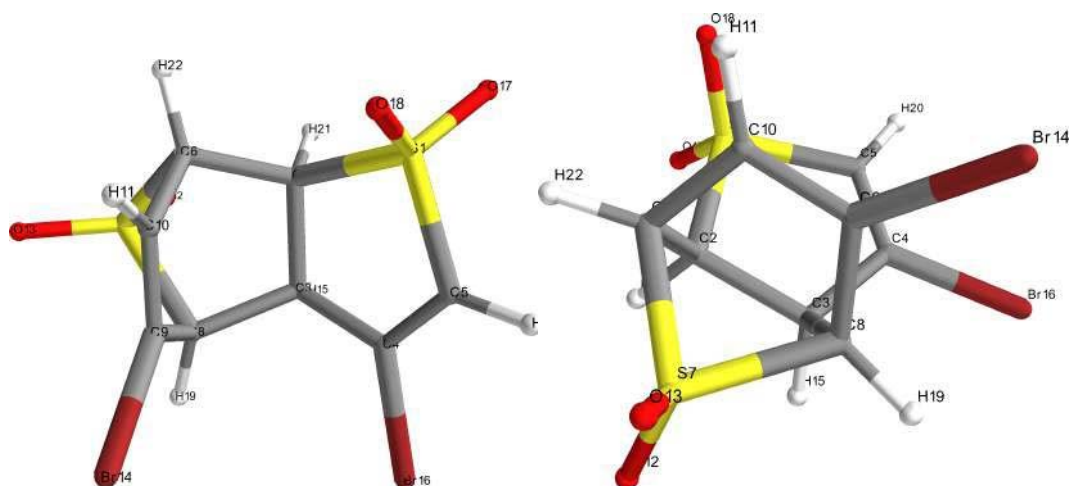

Figure 1: Chemical structure diagram with atomic numbering from two points of view.

|                   |                                                                             |
|-------------------|-----------------------------------------------------------------------------|
| Directory name    | 3-Cy                                                                        |
| Formula           | C <sub>8</sub> H <sub>6</sub> Br <sub>2</sub> O <sub>4</sub> S <sub>2</sub> |
| Charge            | 0                                                                           |
| Spin multiplicity | 1                                                                           |

## b- Computational details

|                                                         |              |             |
|---------------------------------------------------------|--------------|-------------|
| Software                                                | Gaussian     | (2009+D.01) |
| Computational method                                    | DFT          |             |
| Functional                                              | B3LYP        |             |
| Basis set name                                          | 6-311G(2d,p) |             |
| Number of basis set functions                           | 472          |             |
| Closed shell calculation                                | True         |             |
| Requested SCF convergence on RMS and Max density matrix | 1e-08        | 1e-06       |
| Requested SCF convergence on energy                     | 1e-06        |             |
| Job type: Geometry optimization                         |              |             |
| Max Force value and threshold                           | 0.000108     | 0.000450    |
| RMS Force value and threshold                           | 0.000020     | 0.000300    |
| Max Displacement value and threshold                    | 0.001683     | 0.001800    |
| RMS Displacement value and threshold                    | 0.000355     | 0.001200    |
| Job type: Frequency and thermochemical analysis         |              |             |
| Temperature                                             | 298.15 K     |             |
| Anharmonic effects                                      | None         |             |
| Anharmonic effects                                      | None         |             |

## c- Results

|                        |                      |
|------------------------|----------------------|
| Total molecular energy | -6554.10540 hartrees |
| HOMO number            | 94                   |
| LUMO+1 energies        | -1.54 eV             |
| LUMO energies          | -1.86 eV             |
| HOMO energies          | -7.64 eV             |
| HOMO-1 energies        | -8.07 eV             |

|                                                |                      |
|------------------------------------------------|----------------------|
| Geometry optimization specific results         |                      |
| Converged nuclear repulsion energy             | 2430.79511 Hartrees  |
| Frequency and Thermochemistry specific results |                      |
| Enthalpy at 298.15 K                           | -6553.95379 Hartrees |
| Gibbs free energy at 298.15 K                  | -6554.01243 Hartrees |
| Entropy at 298.15 K                            | 0.00020 Hartrees     |

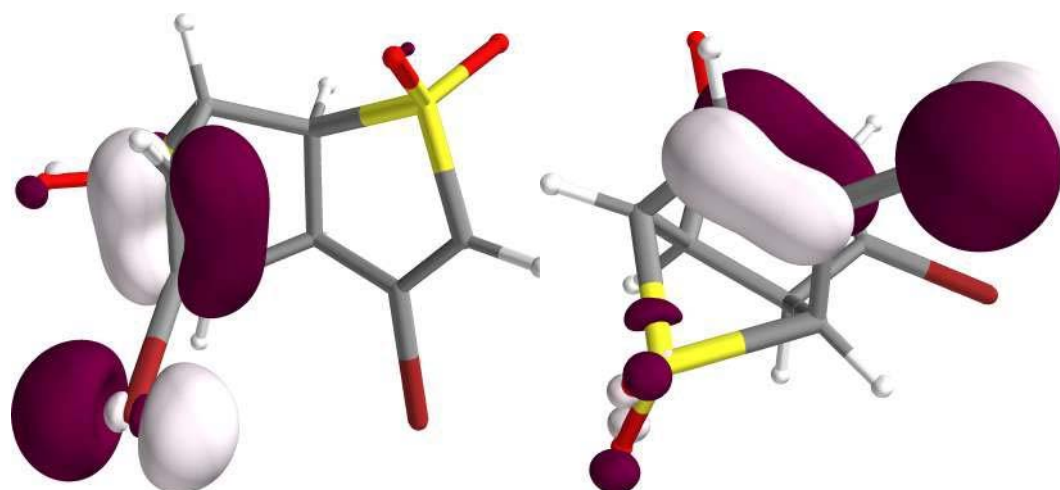

Figure 2: Representation of the HOMO from two points of view.

Table. Most intense (> 50 km/mol) molecular vibrations in wavenumbers

| Frequencies | Intensity | Symmetry |
|-------------|-----------|----------|
| 1654        | 67        | A        |
| 1339        | 162       | A        |
| 1325        | 145       | A        |
| 1233        | 70        | A        |
| 1179        | 101       | A        |
| 1172        | 88        | A        |
| 1131        | 143       | A        |
| 1101        | 78        | A        |
| 550         | 51        | A        |

Table. Converged cartesian atomic coordinates in Angstroms

| Atom | X       | Y       | Z       |
|------|---------|---------|---------|
| S    | -1.7786 | -1.7742 | 1.0410  |
| C    | -0.4407 | -1.8172 | -0.2310 |
| C    | -0.5024 | -0.4522 | -0.9922 |
| C    | -1.5836 | 0.3860  | -0.3614 |
| C    | -2.2777 | -0.1130 | 0.6462  |
| C    | 0.9776  | -1.9515 | 0.3467  |
| S    | 1.9201  | -1.4242 | -1.2188 |
| C    | 0.9280  | 0.1572  | -0.8851 |
| C    | 1.2973  | 0.3525  | 0.5437  |
| C    | 1.3233  | -0.7942 | 1.2288  |
| H    | 1.5979  | -0.9111 | 2.2649  |
| O    | 1.4246  | -2.1087 | -2.3974 |
| O    | 3.3400  | -1.2649 | -1.0163 |
| Br   | 1.7521  | 2.0563  | 1.2293  |
| H    | -0.7339 | -0.6155 | -2.0453 |
| Br   | -1.9157 | 2.1063  | -1.1000 |
| O    | -2.8228 | -2.6956 | 0.6425  |
| O    | -1.2329 | -1.8436 | 2.3822  |
| H    | 1.1440  | 0.9635  | -1.5770 |
| H    | -3.0936 | 0.3356  | 1.1915  |
| H    | -0.6948 | -2.6519 | -0.8792 |
| H    | 1.2421  | -2.9403 | 0.7072  |

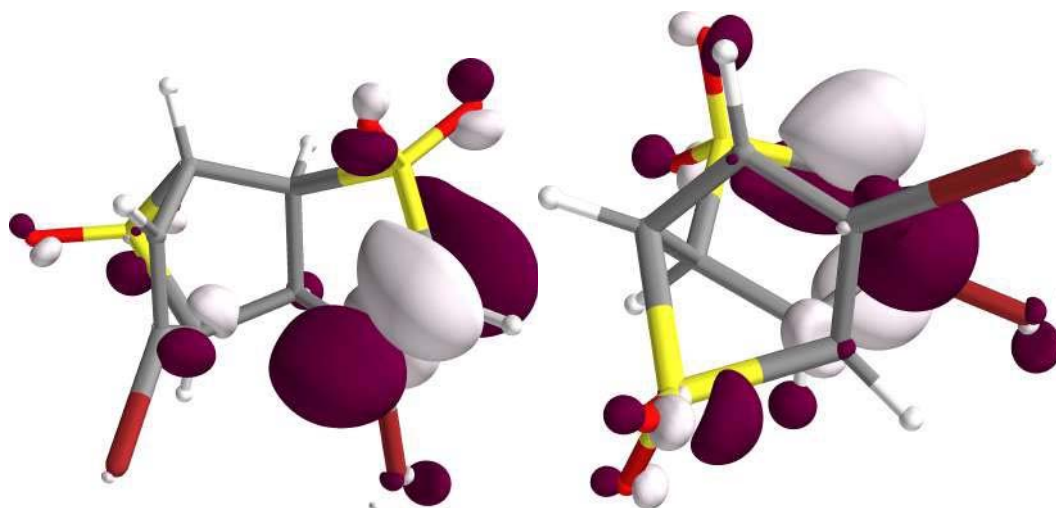

Figure 3: Representation of the LUMO from two points of view.

# 19- 2,5-dibromothiophene 4

## a- Description

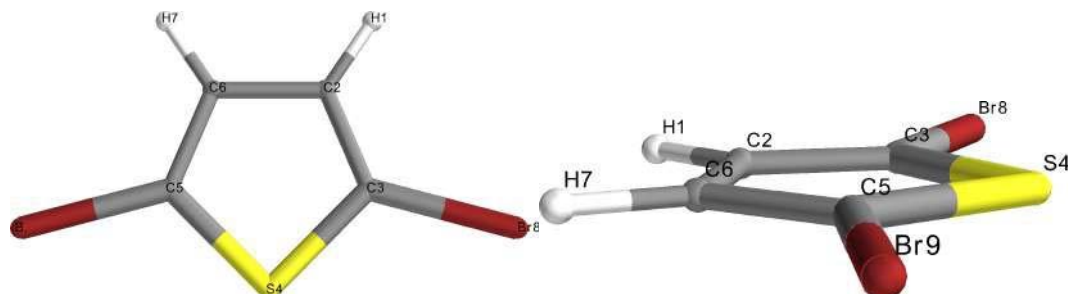

Figure 1: Chemical structure diagram with atomic numbering from two points of view.

|                   |          |
|-------------------|----------|
| Directory name    | 4        |
| Formula           | C4H2Br2S |
| Charge            | 0        |
| Spin multiplicity | 1        |

## b- Computational details

|                                                         |              |             |
|---------------------------------------------------------|--------------|-------------|
| Software                                                | Gaussian     | (2009+D.01) |
| Computational method                                    | DFT          |             |
| Functional                                              | B3LYP        |             |
| Basis set name                                          | 6-311G(2d,p) |             |
| Number of basis set functions                           | 233          |             |
| Closed shell calculation                                | True         |             |
| Requested SCF convergence on RMS and Max density matrix | 1e-08        | 1e-06       |
| Requested SCF convergence on energy                     | 1e-06        |             |
| Job type: Geometry optimization                         |              |             |
| Max Force value and threshold                           | 0.000135     | 0.000450    |
| RMS Force value and threshold                           | 0.000031     | 0.000300    |
| Max Displacement value and threshold                    | 0.000581     | 0.001800    |
| RMS Displacement value and threshold                    | 0.000141     | 0.001200    |
| Job type: Frequency and thermochemical analysis         |              |             |
| Temperature                                             | 298.15 K     |             |
| Anharmonic effects                                      | None         |             |
| Anharmonic effects                                      | None         |             |

## c- Results

|                        |                      |
|------------------------|----------------------|
| Total molecular energy | -5700.14275 hartrees |
| HOMO number            | 56                   |
| LUMO+1 energies        | -1.08 eV             |
| LUMO energies          | -1.19 eV             |
| HOMO energies          | -6.49 eV             |
| HOMO-1 energies        | -7.58 eV             |

|                                        |                    |
|----------------------------------------|--------------------|
| Geometry optimization specific results |                    |
| Converged nuclear repulsion energy     | 794.18300 Hartrees |

|                                                |                      |
|------------------------------------------------|----------------------|
| Frequency and Thermochemistry specific results |                      |
| Enthalpy at 298.15 K                           | -5700.08819 Hartrees |
| Gibbs free energy at 298.15 K                  | -5700.13025 Hartrees |
| Entropy at 298.15 K                            | 0.00014 Hartrees     |

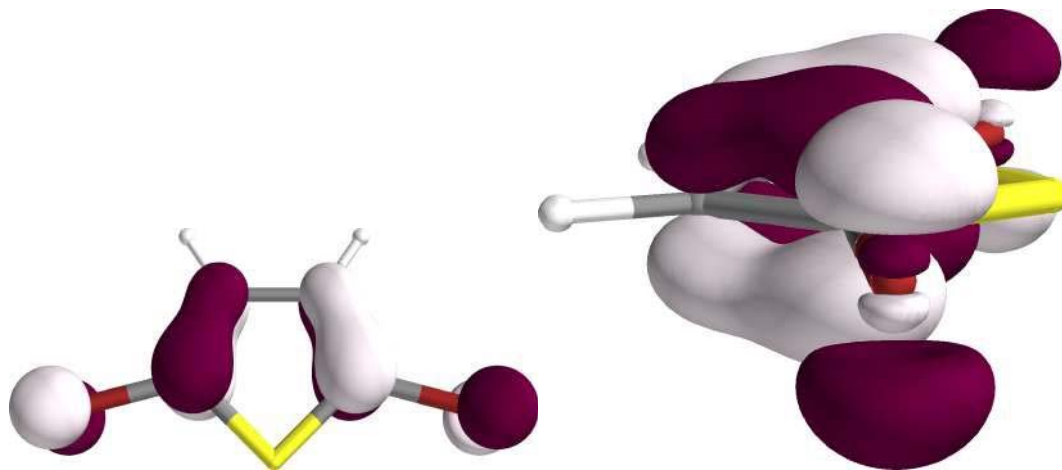

Figure 2: Representation of the HOMO from two points of view.

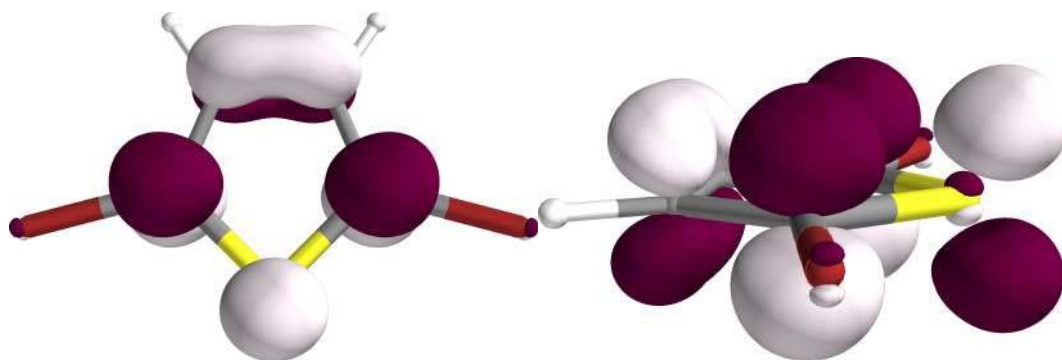

Figure 3: Representation of the LUMO from two points of view.

| Table. Most intense (> 50 km/mol) molecular vibrations in wavenumbers |           |          |
|-----------------------------------------------------------------------|-----------|----------|
| Frequencies                                                           | Intensity | Symmetry |
| 978                                                                   | 87        | A        |

Table. Converged cartesian atomic coordinates in Angstroms

| Atom | X       | Y       | Z       |
|------|---------|---------|---------|
| H    | -1.3179 | -2.4553 | 0.0000  |
| C    | -0.7126 | -1.5604 | 0.0000  |
| C    | -1.2303 | -0.3038 | 0.0000  |
| S    | 0.0000  | 0.9222  | 0.0000  |
| C    | 1.2303  | -0.3038 | 0.0000  |
| C    | 0.7126  | -1.5604 | 0.0000  |
| H    | 1.3179  | -2.4553 | 0.0000  |
| Br   | -3.0567 | 0.1790  | -0.0000 |
| Br   | 3.0567  | 0.1790  | -0.0000 |

## 20- 2,5-dibromothiophene sulfoxide 4-SO

### a- Description

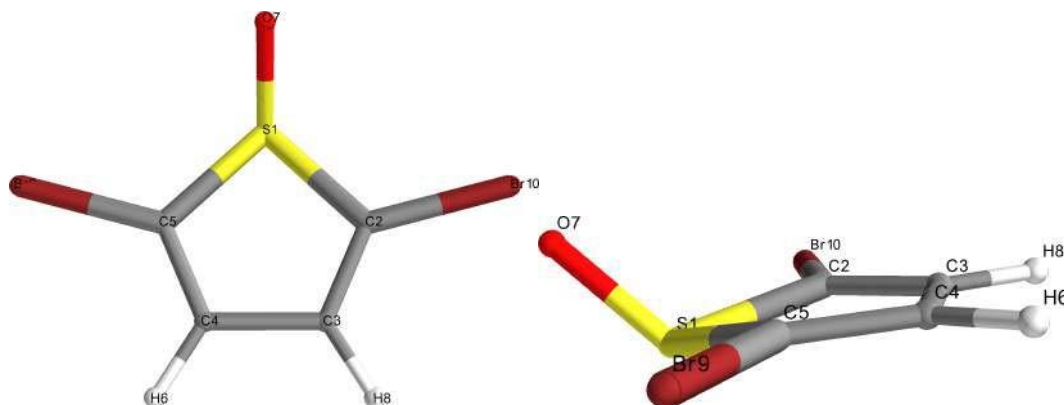

Figure 1: Chemical structure diagram with atomic numbering from two points of view.

|                   |           |
|-------------------|-----------|
| Directory name    | 4-SO      |
| Formula           | C4H2Br2OS |
| Charge            | 0         |
| Spin multiplicity | 1         |

### b- Computational details

|                                                         |              |             |
|---------------------------------------------------------|--------------|-------------|
| Software                                                | Gaussian     | (2009+D.01) |
| Computational method                                    | DFT          |             |
| Functional                                              | B3LYP        |             |
| Basis set name                                          | 6-311G(2d,p) |             |
| Number of basis set functions                           | 256          |             |
| Closed shell calculation                                | True         |             |
| Requested SCF convergence on RMS and Max density matrix | 1e-08        | 1e-06       |
| Requested SCF convergence on energy                     | 1e-06        |             |
| Job type: Geometry optimization                         |              |             |
| Max Force value and threshold                           | 0.000211     | 0.000450    |
| RMS Force value and threshold                           | 0.000063     | 0.000300    |
| Max Displacement value and threshold                    | 0.001361     | 0.001800    |
| RMS Displacement value and threshold                    | 0.000400     | 0.001200    |
| Job type: Frequency and thermochemical analysis         |              |             |
| Temperature                                             | 298.15 K     |             |
| Anharmonic effects                                      | None         |             |
| Anharmonic effects                                      | None         |             |

## c- Results

|                                                |                      |
|------------------------------------------------|----------------------|
| Total molecular energy                         | -5775.31615 hartrees |
| HOMO number                                    | 60                   |
| LUMO+1 energies                                | -1.19 eV             |
| LUMO energies                                  | -2.60 eV             |
| HOMO energies                                  | -6.86 eV             |
| HOMO-1 energies                                | -7.04 eV             |
| Geometry optimization specific results         |                      |
| Converged nuclear repulsion energy             | 946.71174 Hartrees   |
| Frequency and Thermochemistry specific results |                      |
| Enthalpy at 298.15 K                           | -5775.25730 Hartrees |
| Gibbs free energy at 298.15 K                  | -5775.30266 Hartrees |
| Entropy at 298.15 K                            | 0.00015 Hartrees     |

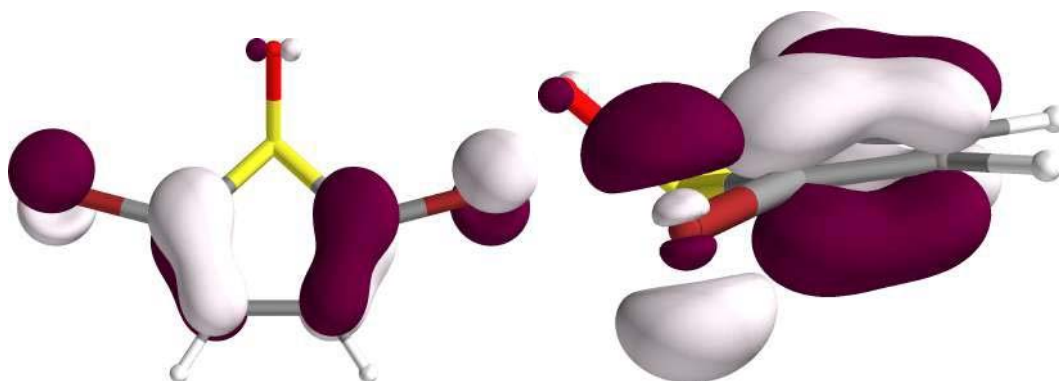

Figure 2: Representation of the HOMO from two points of view.

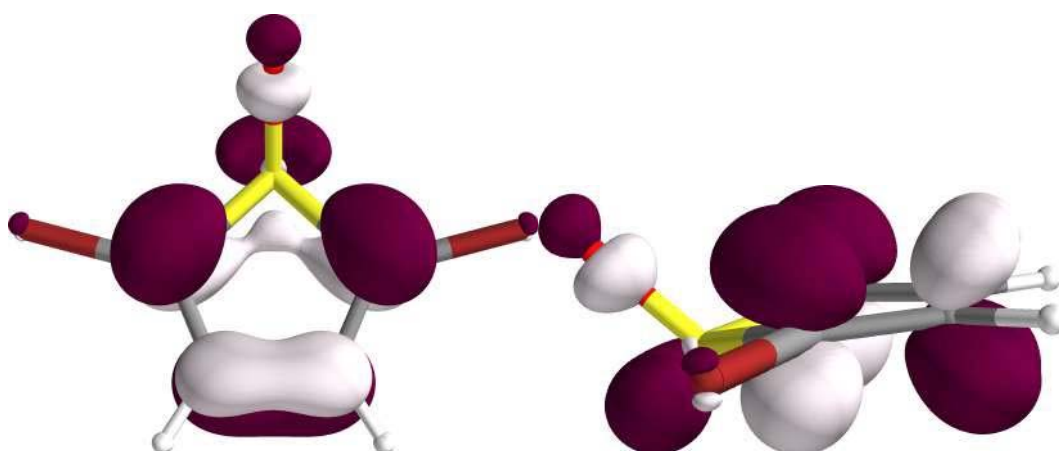

Figure 3: Representation of the LUMO from two points of view.



Table. Most intense (> 50 km/mol) molecular vibrations in wavenumbers

| Frequencies | Intensity | Symmetry |
|-------------|-----------|----------|
| 1113        | 117       | A        |
| 961         | 63        | A        |

Table. Converged cartesian atomic coordinates in Angstroms

| Atom | X       | Y       | Z       |
|------|---------|---------|---------|
| S    | 0.0001  | -0.8066 | -0.3589 |
| C    | -1.2643 | 0.4540  | 0.0286  |
| C    | -0.7306 | 1.6743  | 0.1448  |
| C    | 0.7307  | 1.6743  | 0.1449  |
| C    | 1.2645  | 0.4541  | 0.0285  |
| H    | 1.3076  | 2.5862  | 0.2281  |
| O    | 0.0003  | -1.9636 | 0.5676  |
| H    | -1.3075 | 2.5861  | 0.2279  |
| Br   | 3.0772  | -0.0300 | -0.0191 |
| Br   | -3.0773 | -0.0300 | -0.0191 |
